# Supplementary material for: Asymmetric total syntheses of aspilactonol F and aspiketolactonol and synthetic studies toward diplofuranoxin
Source: Royal Society of Chemistry journal article supplement (doi:10.1039/d4ob00549j), 2024-01-01

## Supporting information

### **Asymmetric Total Syntheses of Aspilactonol F, Aspiketolactonol and Synthetic Studies Toward Diplofuranoxin**

Sagar B. Khandekar and Rodney A. Fernandes\*  
Department of Chemistry, Indian Institute of Technology Bombay, Powai  
Mumbai 400076, Maharashtra, India

Email: [rfernand@chem.iitb.ac.in](mailto:rfernand@chem.iitb.ac.in)

$^1\text{H}$ ,  $^{13}\text{C}$  NMR and HRMS spectra of all compounds

S2–S47

<sup>1</sup>H NMR (400 MHz, CDCl<sub>3</sub>) and <sup>13</sup>C{<sup>1</sup>H} NMR (100 MHz, CDCl<sub>3</sub>) of compound **3**

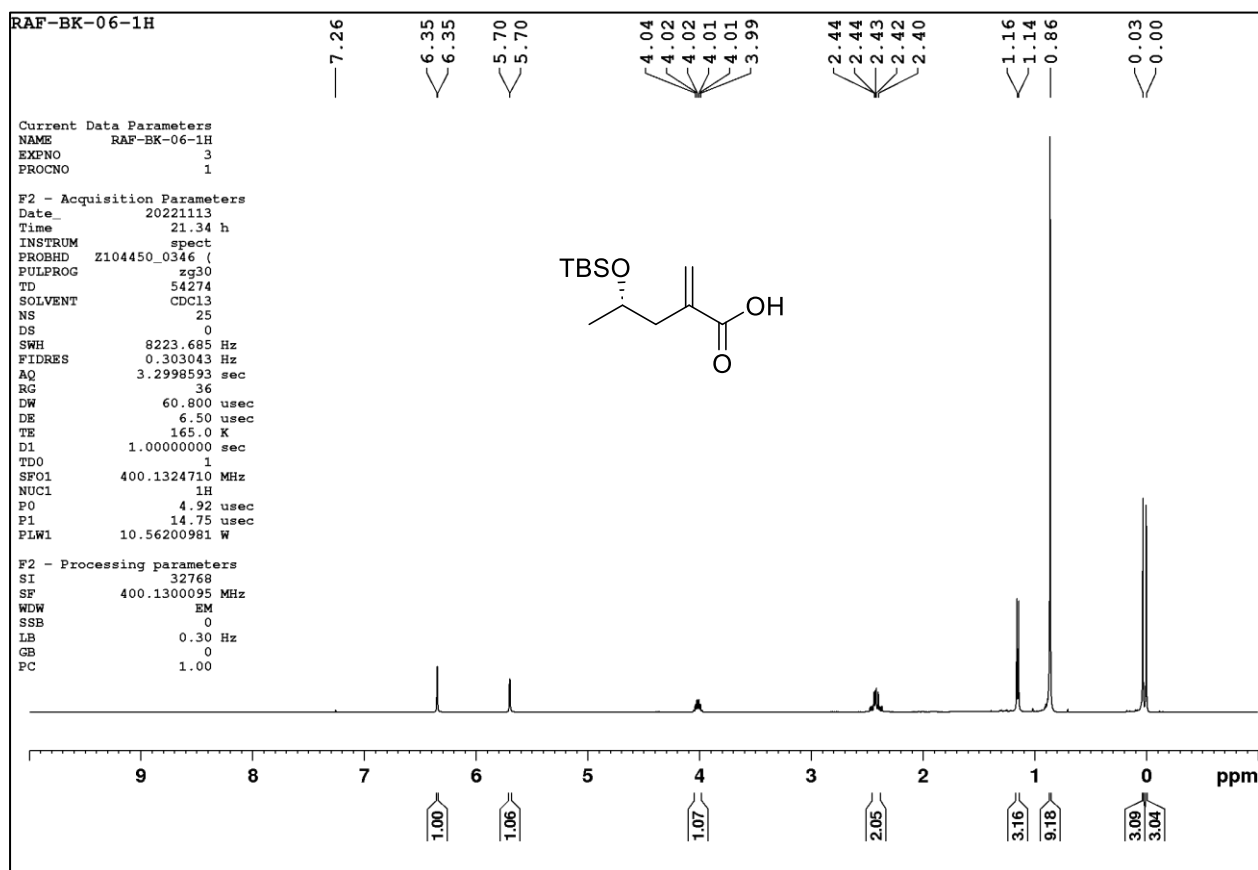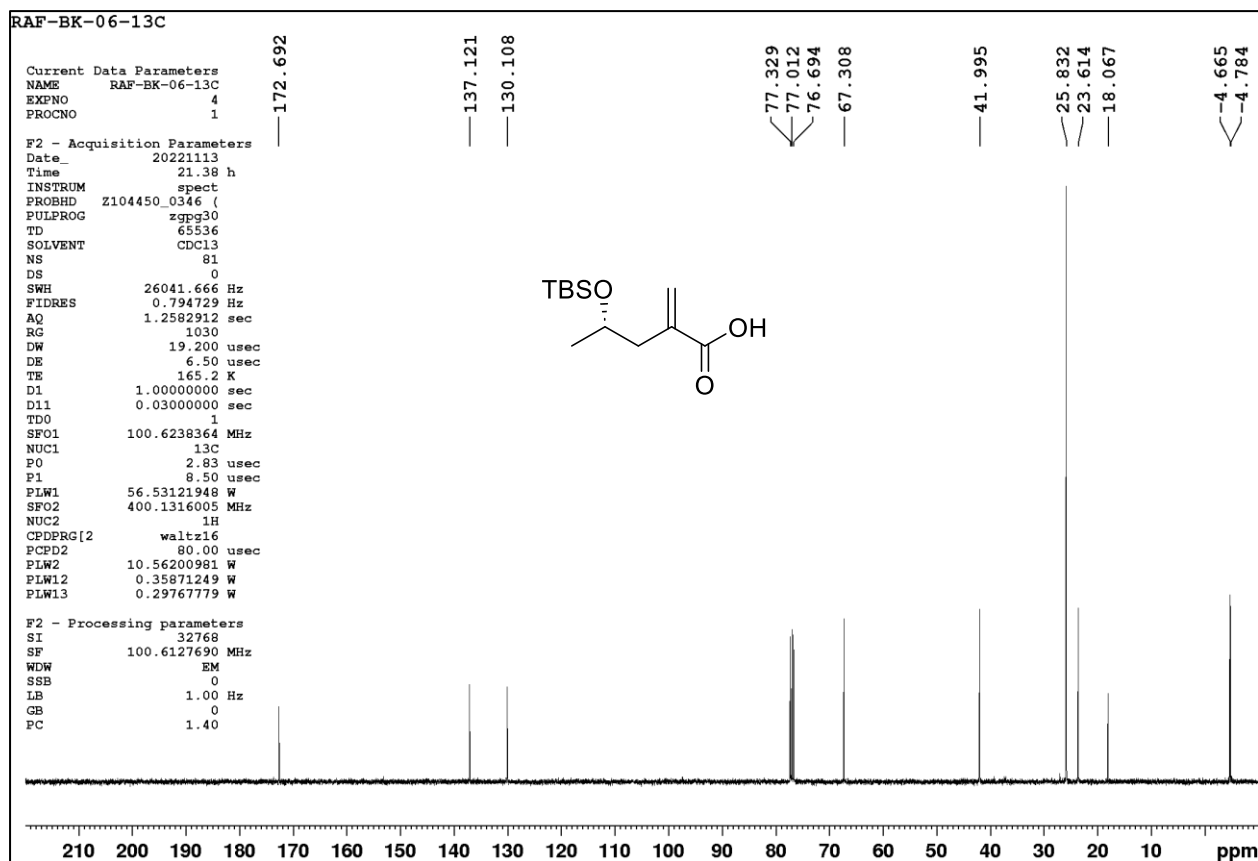

3: HRMS (Q-TOF)  $m/z$ :  $[M + H]^+$  Calcd for  $C_{12}H_{25}O_3Si$  245.1568; Found 245.1578.

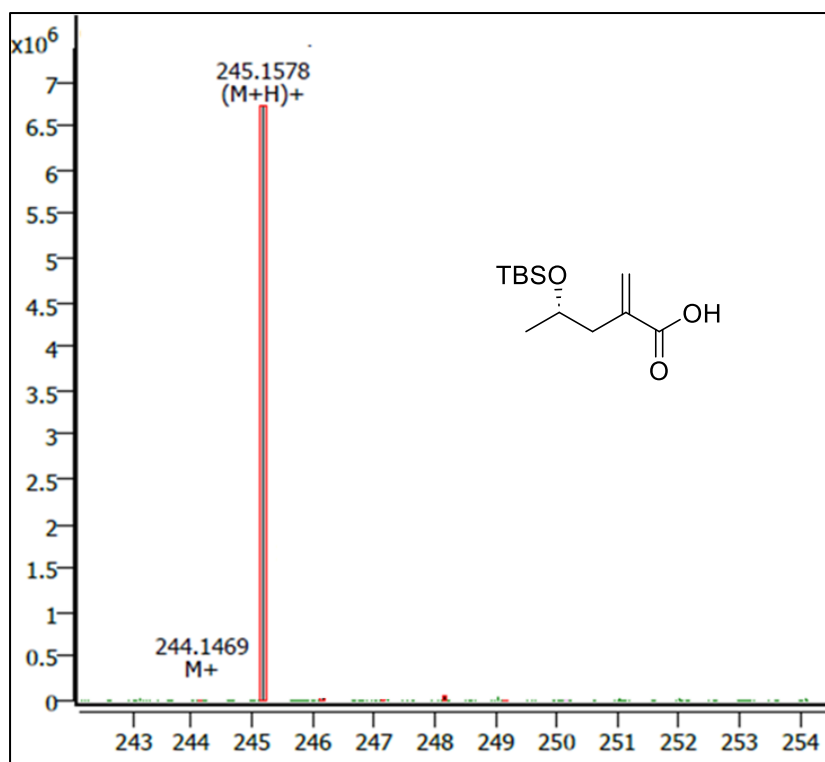

$^1\text{H}$  NMR (500 MHz,  $\text{CDCl}_3$ ) and  $^{13}\text{C}\{^1\text{H}\}$  NMR (125 MHz,  $\text{CDCl}_3$ ) of compound **11**

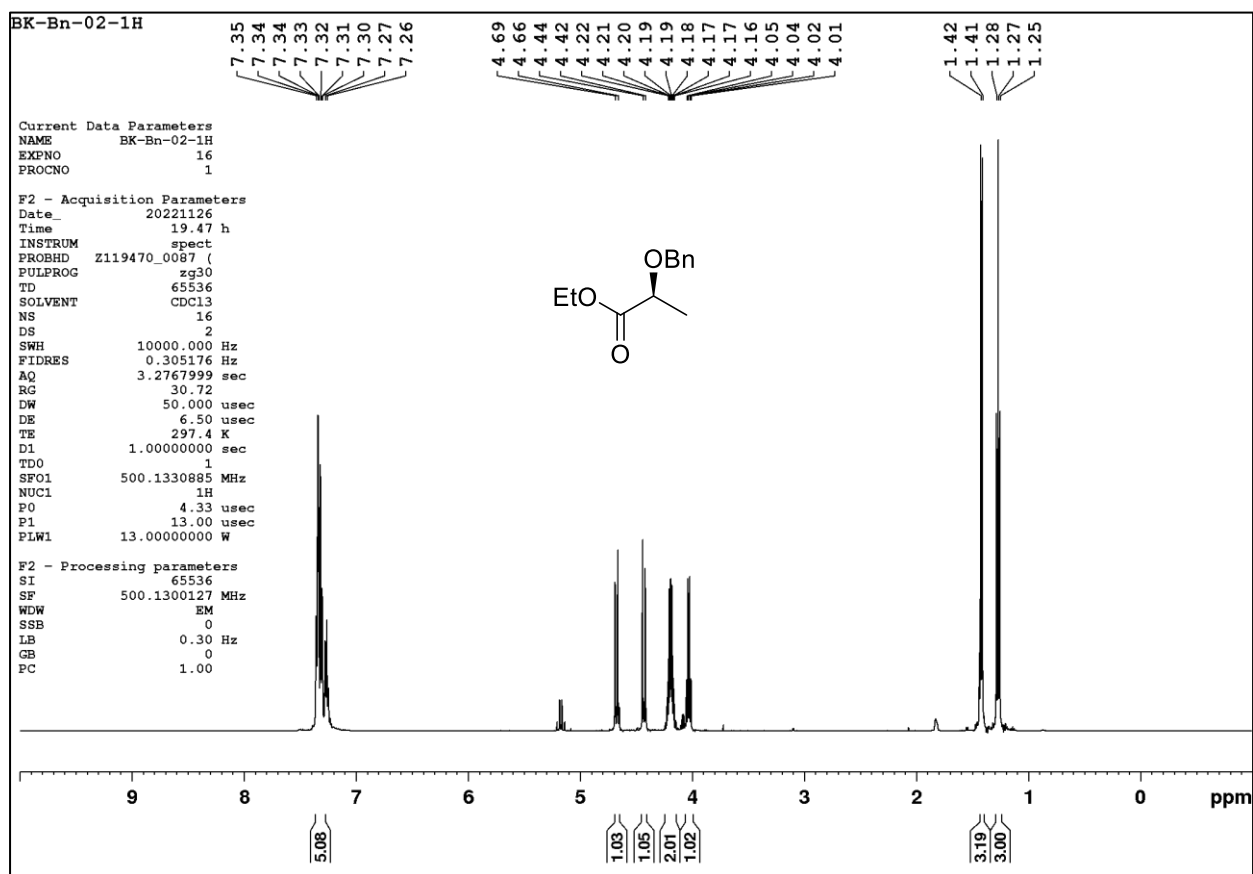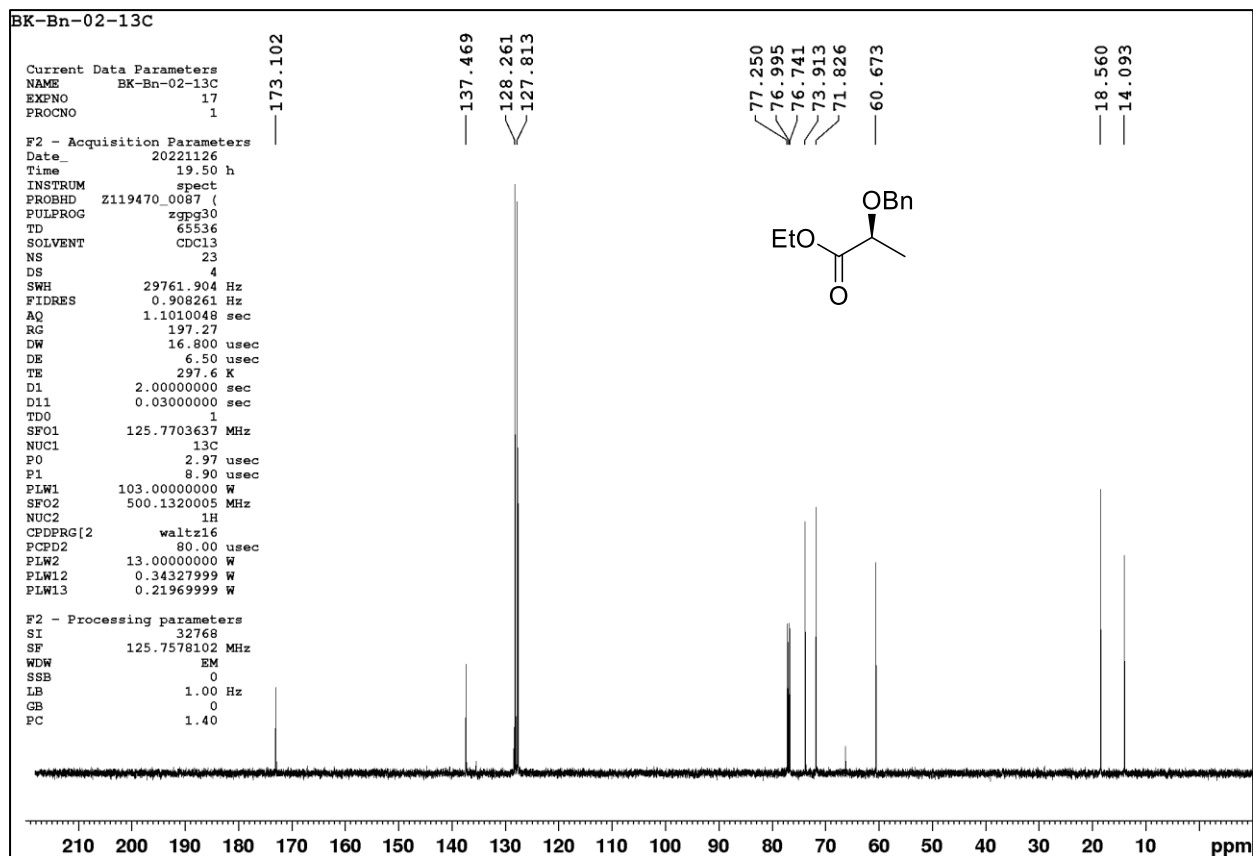

11: HRMS (Q-TOF)  $m/z$ :  $[M + Na]^+$  Calcd for  $C_{12}H_{16}O_3Na$  231.0992; Found 209.0990.

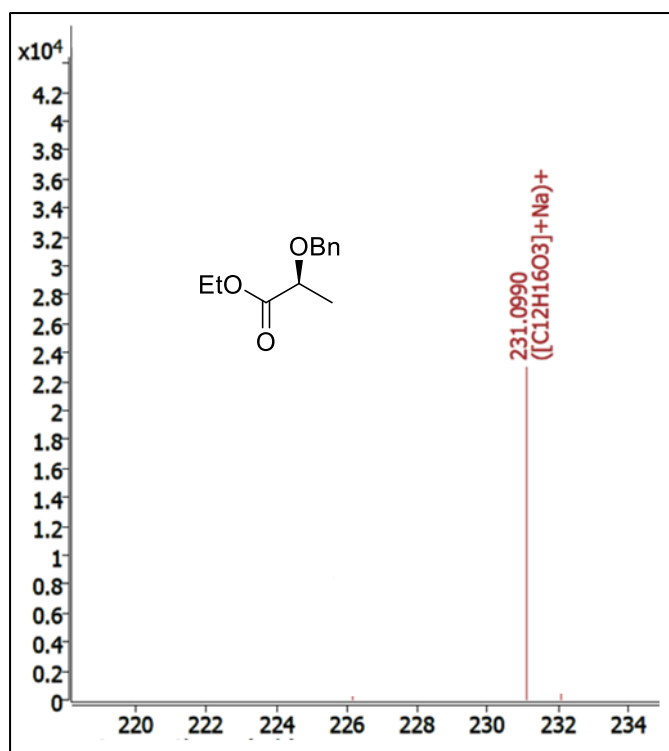

$^1\text{H}$  NMR (400 MHz,  $\text{CDCl}_3$ ) and  $^{13}\text{C}\{^1\text{H}\}$  NMR (100 MHz,  $\text{CDCl}_3$ ) of compound **4a**

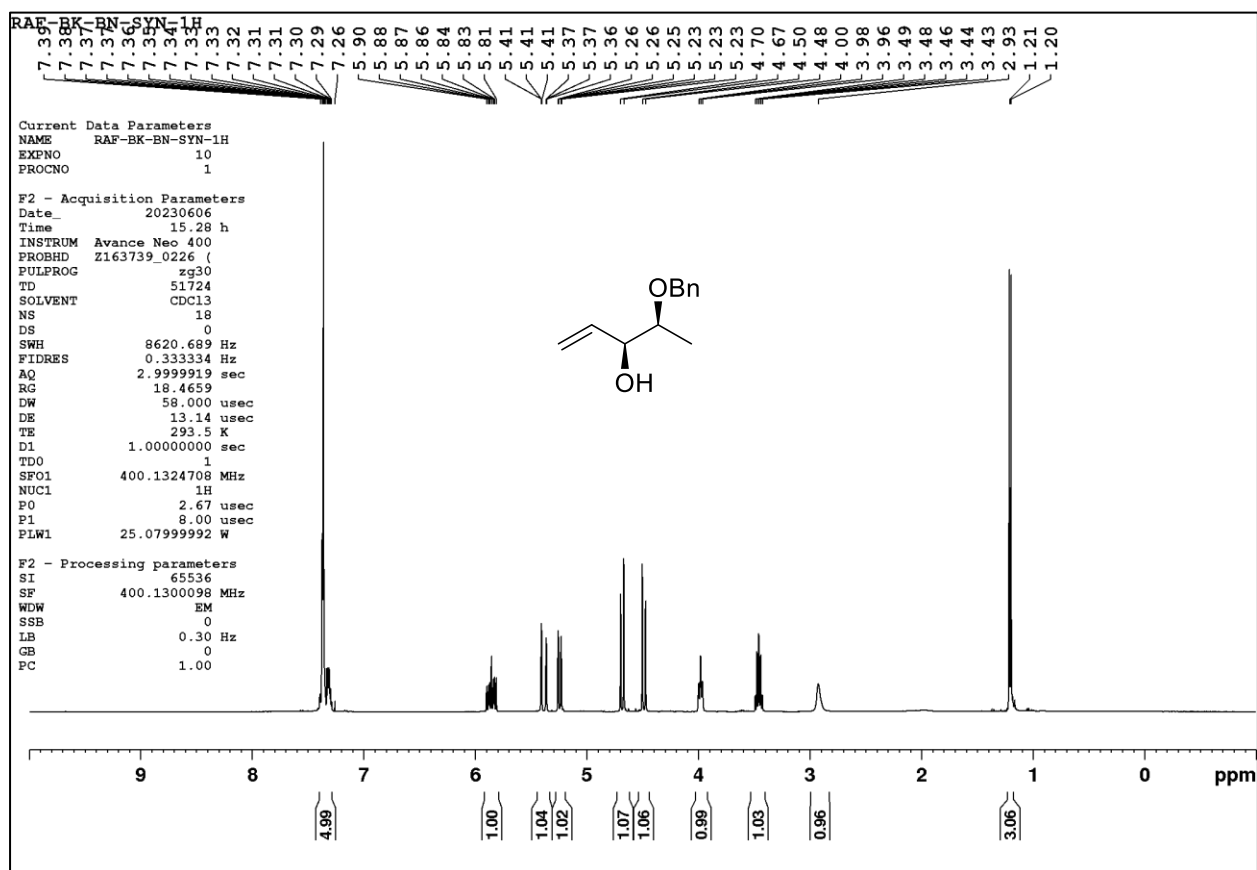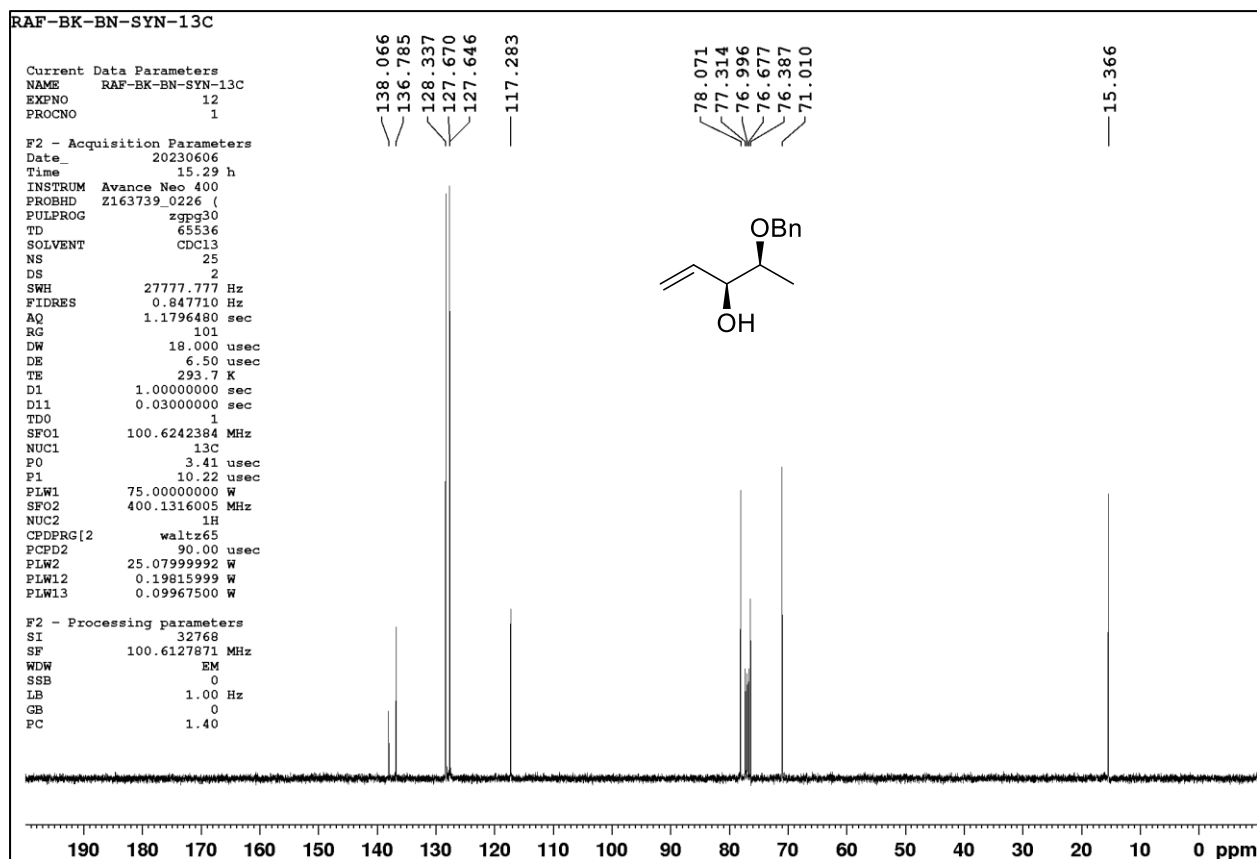

**4a:** HRMS (Q-TOF)  $m/z$ :  $[M + H]^+$  Calcd for  $C_{12}H_{17}O_2$  193.1224; Found 193.1226.

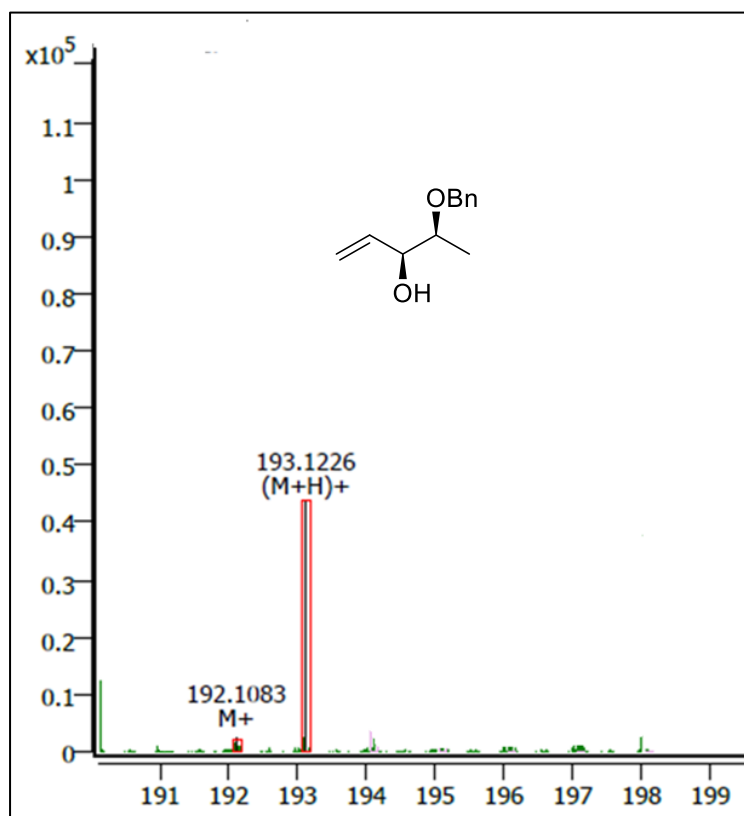

$^1\text{H}$  NMR (400 MHz,  $\text{CDCl}_3$ ) and  $^{13}\text{C}\{^1\text{H}\}$  NMR (100 MHz,  $\text{CDCl}_3$ ) of compound **4b**

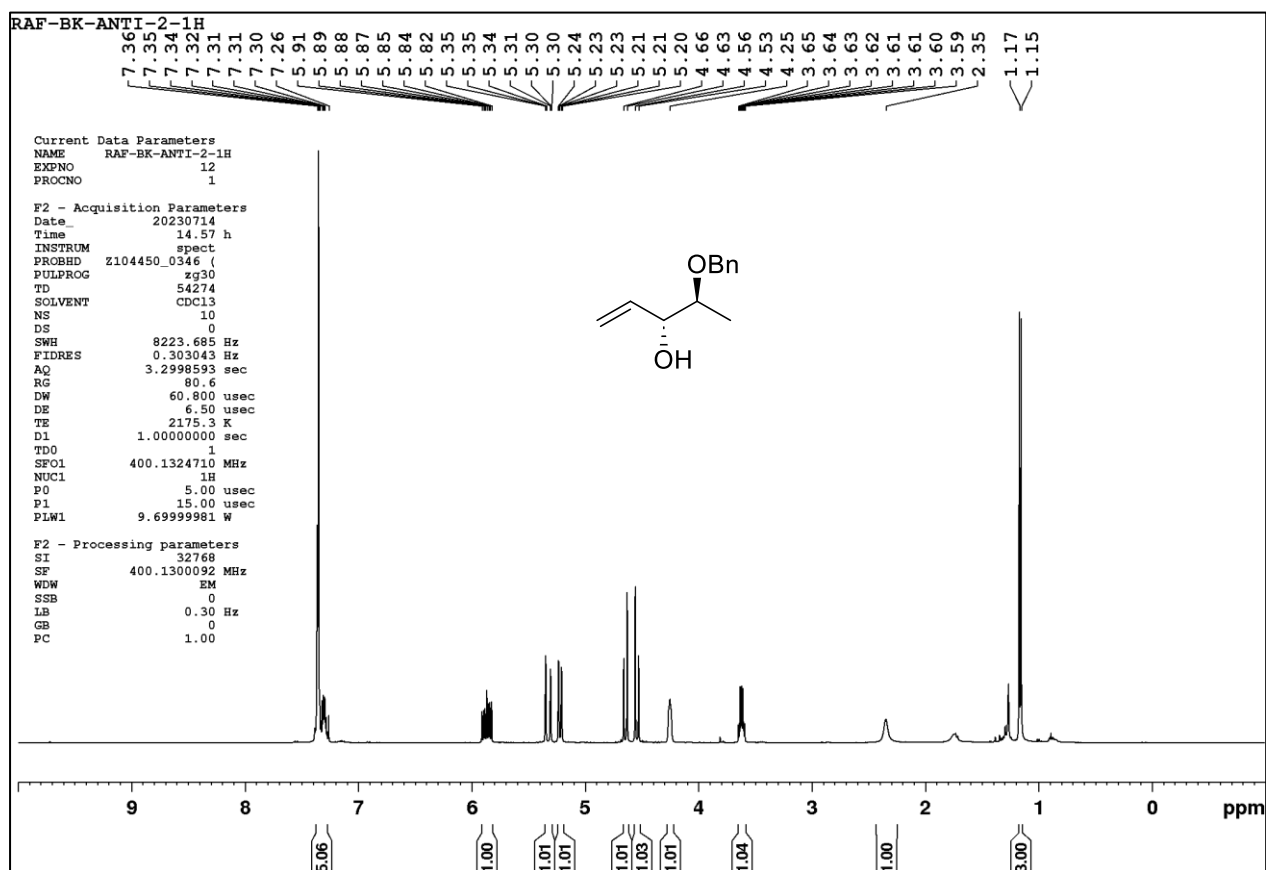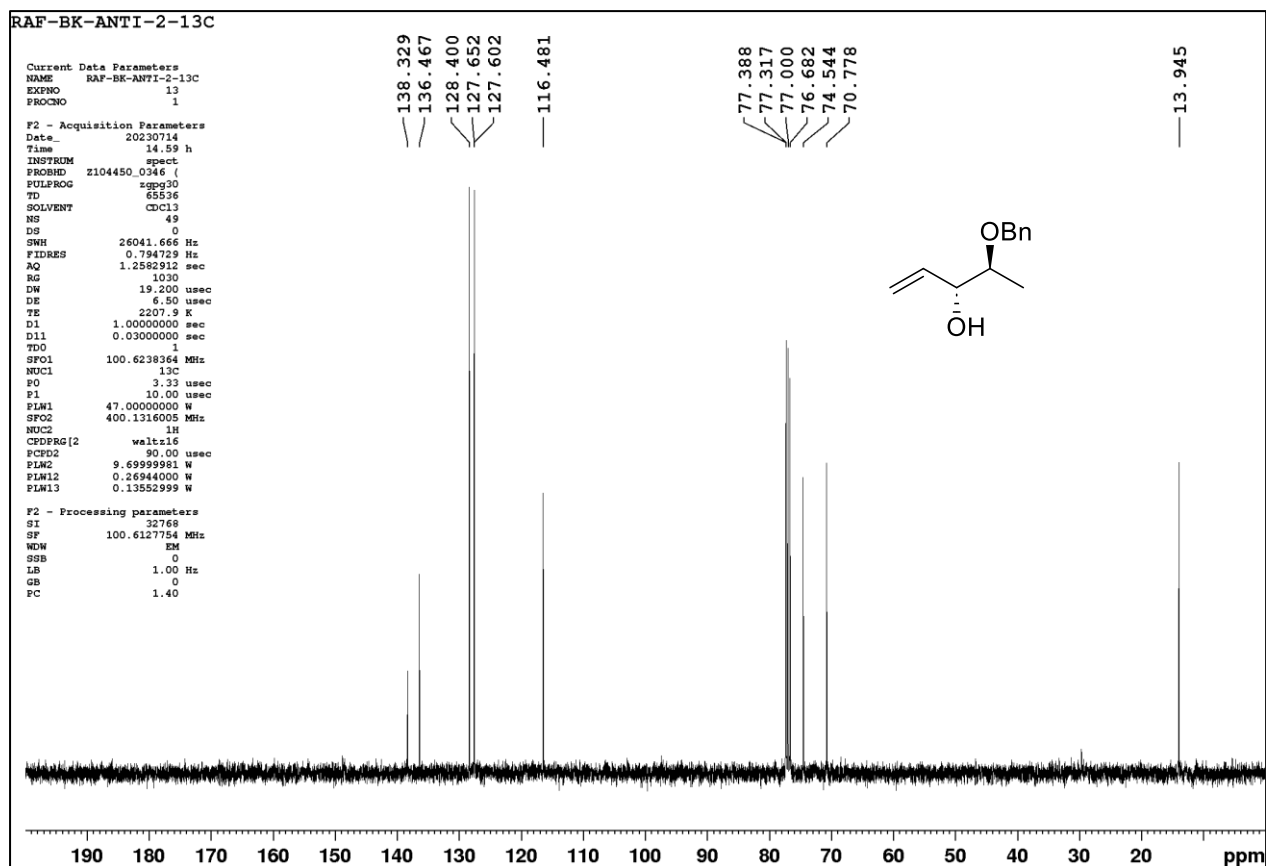



**4b:** HRMS (Q-TOF)  $m/z$ :  $[M + Na]^+$  Calcd for  $C_{12}H_{16}O_2Na$  215.1043; Found 215.1044.

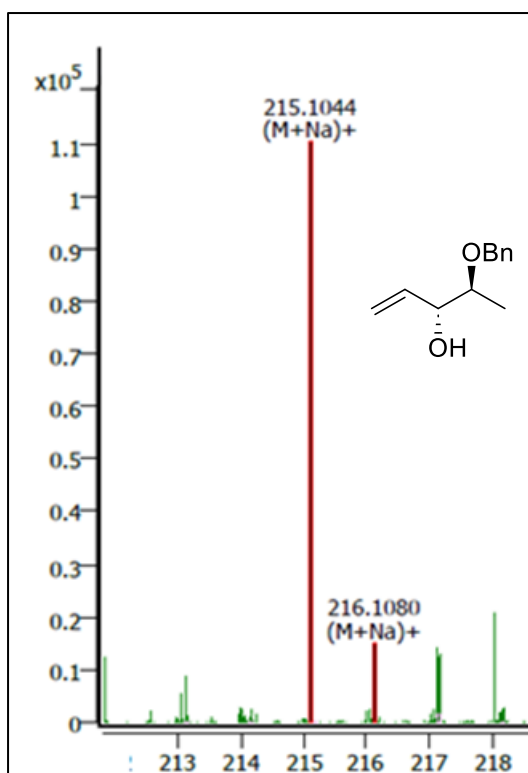

$^1\text{H}$  NMR (500 MHz,  $\text{CDCl}_3$ ) and  $^{13}\text{C}\{^1\text{H}\}$  NMR (125 MHz,  $\text{CDCl}_3$ ) of compound **12a**

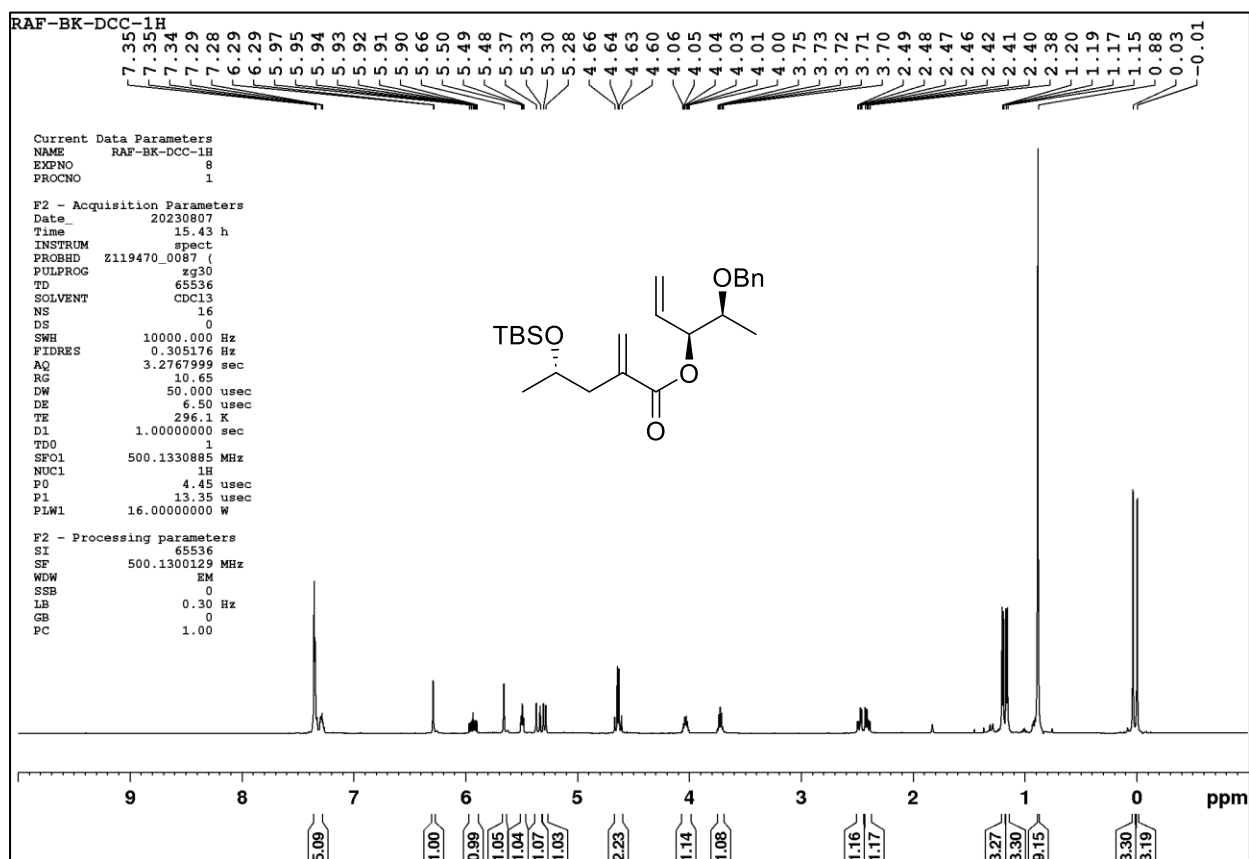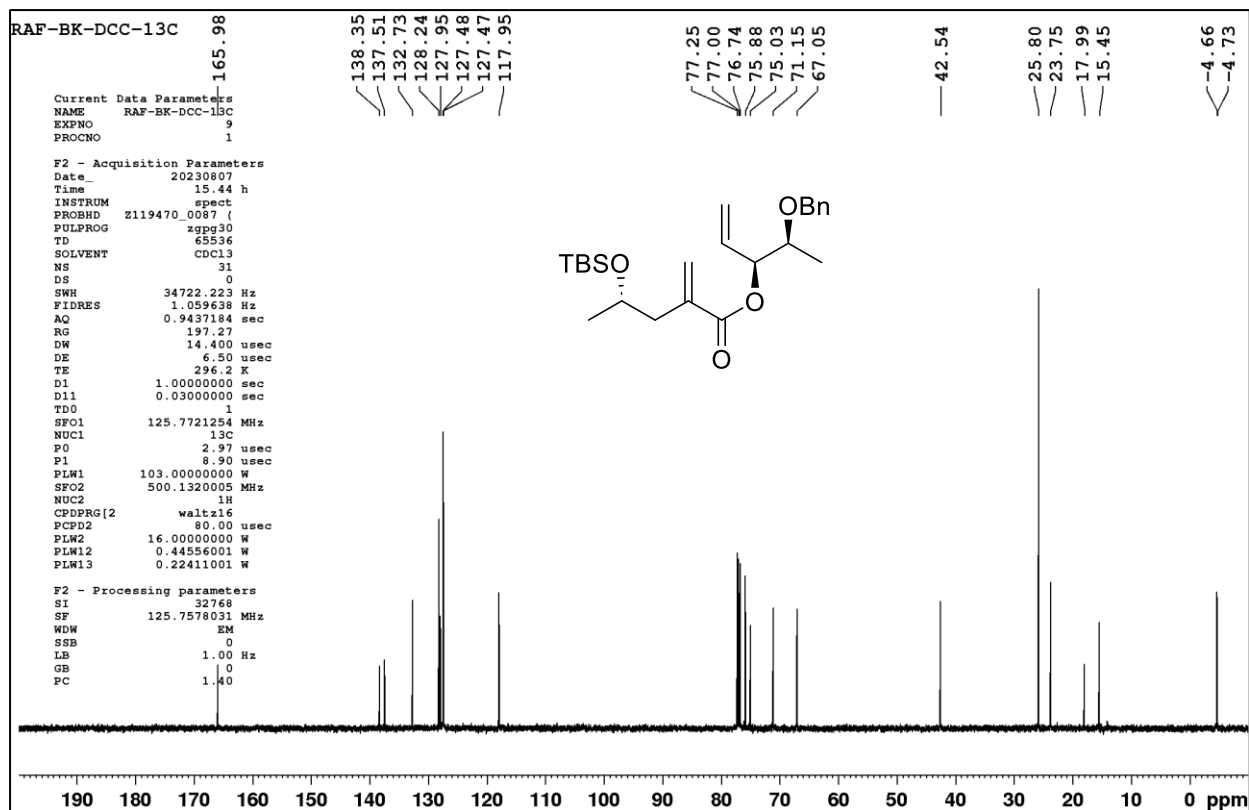



$^1\text{H}$  NMR (400 MHz,  $\text{CDCl}_3$ ) and  $^{13}\text{C}\{^1\text{H}\}$  NMR (100 MHz,  $\text{CDCl}_3$ ) of compound **12b**

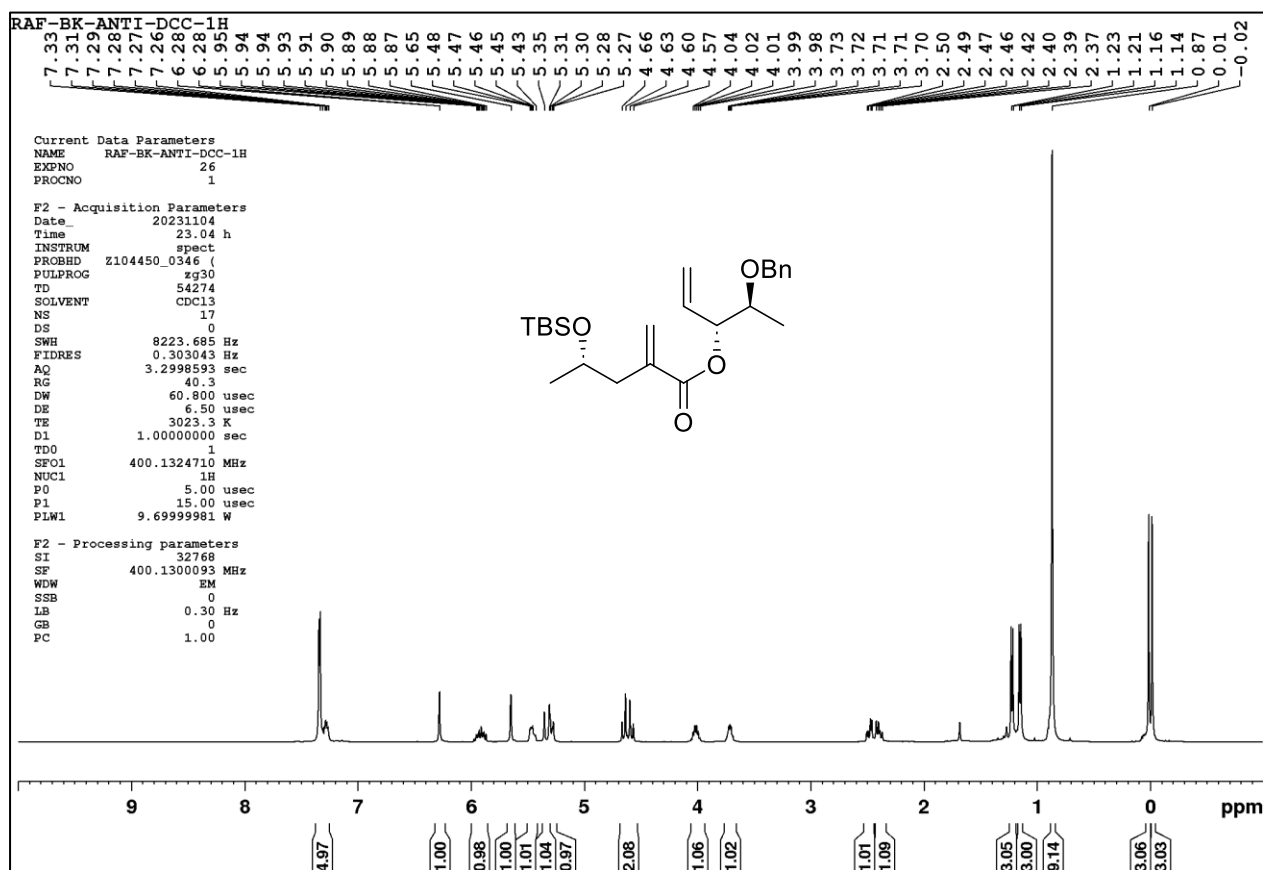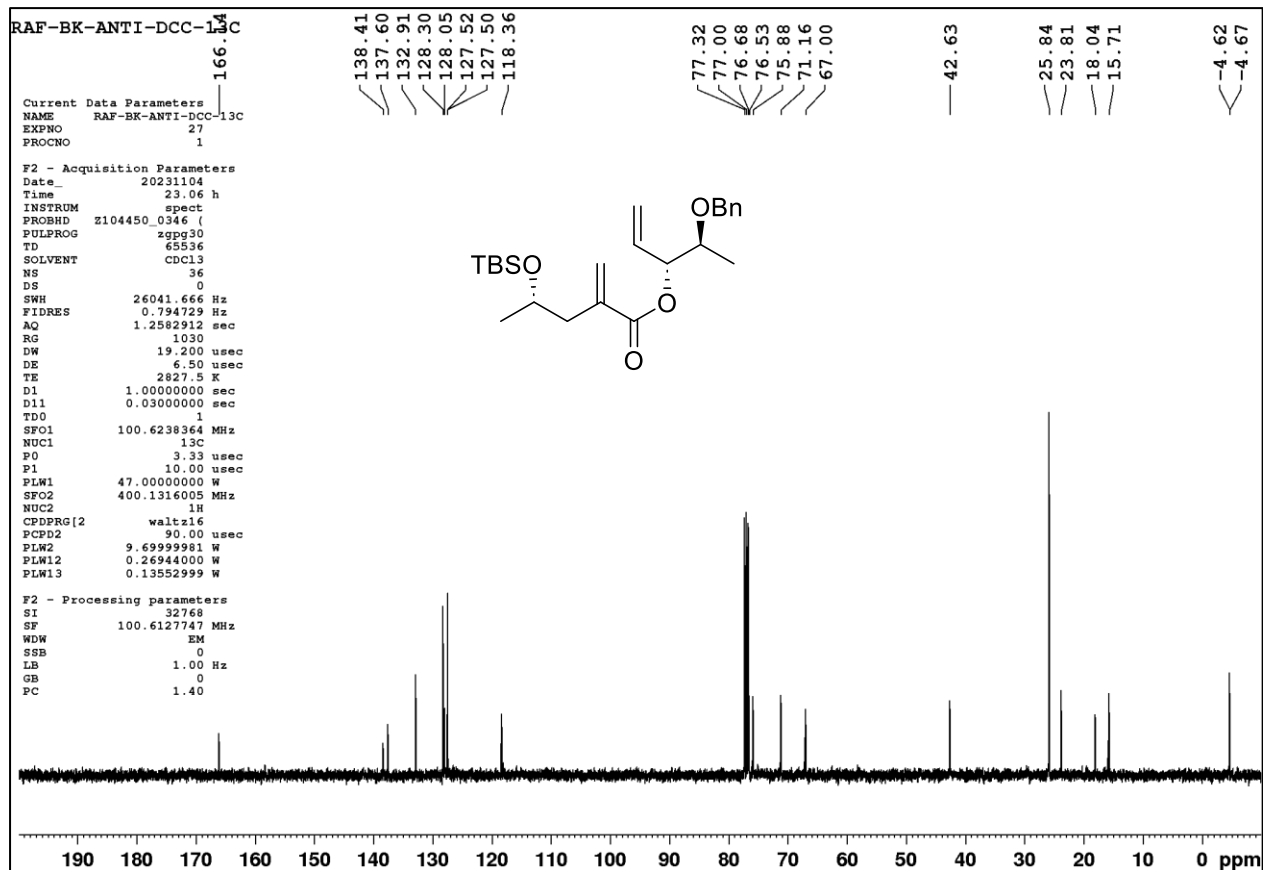

**12b:** HRMS (Q-TOF)  $m/z$ :  $[M + Na]^+$  Calcd for  $C_{24}H_{38}O_4SiNa$  441.2432; Found 441.2437.

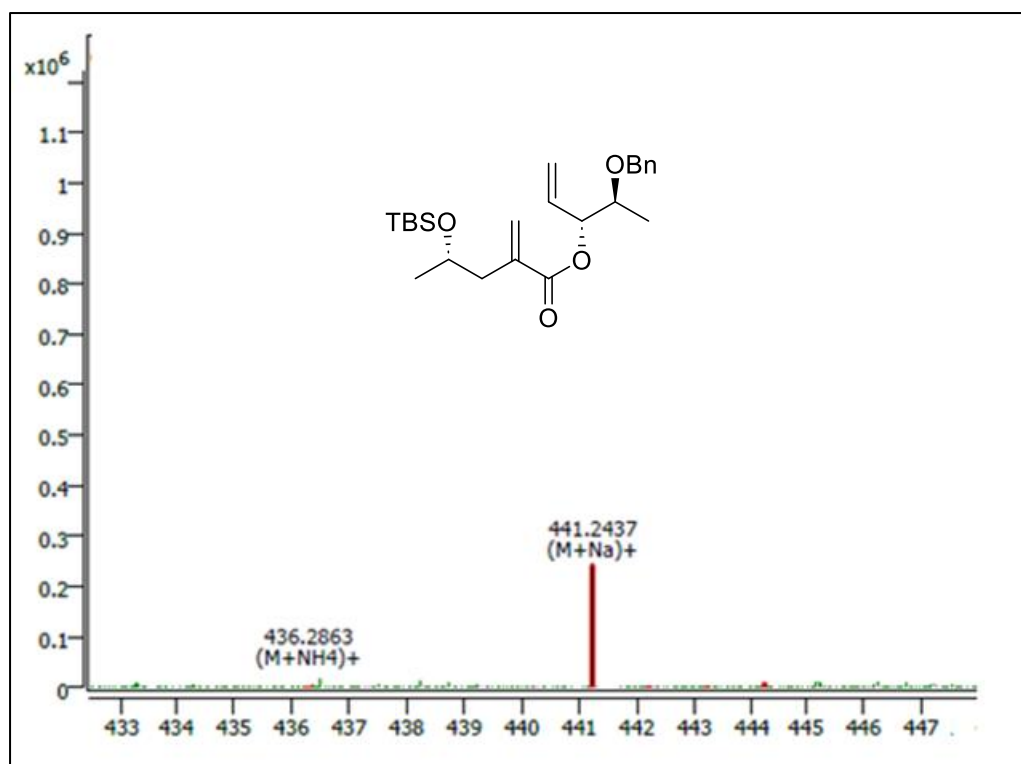

$^1\text{H}$  NMR (500 MHz,  $\text{CDCl}_3$ ) and  $^{13}\text{C}\{^1\text{H}\}$  NMR (125 MHz,  $\text{CDCl}_3$ ) of compound **13**

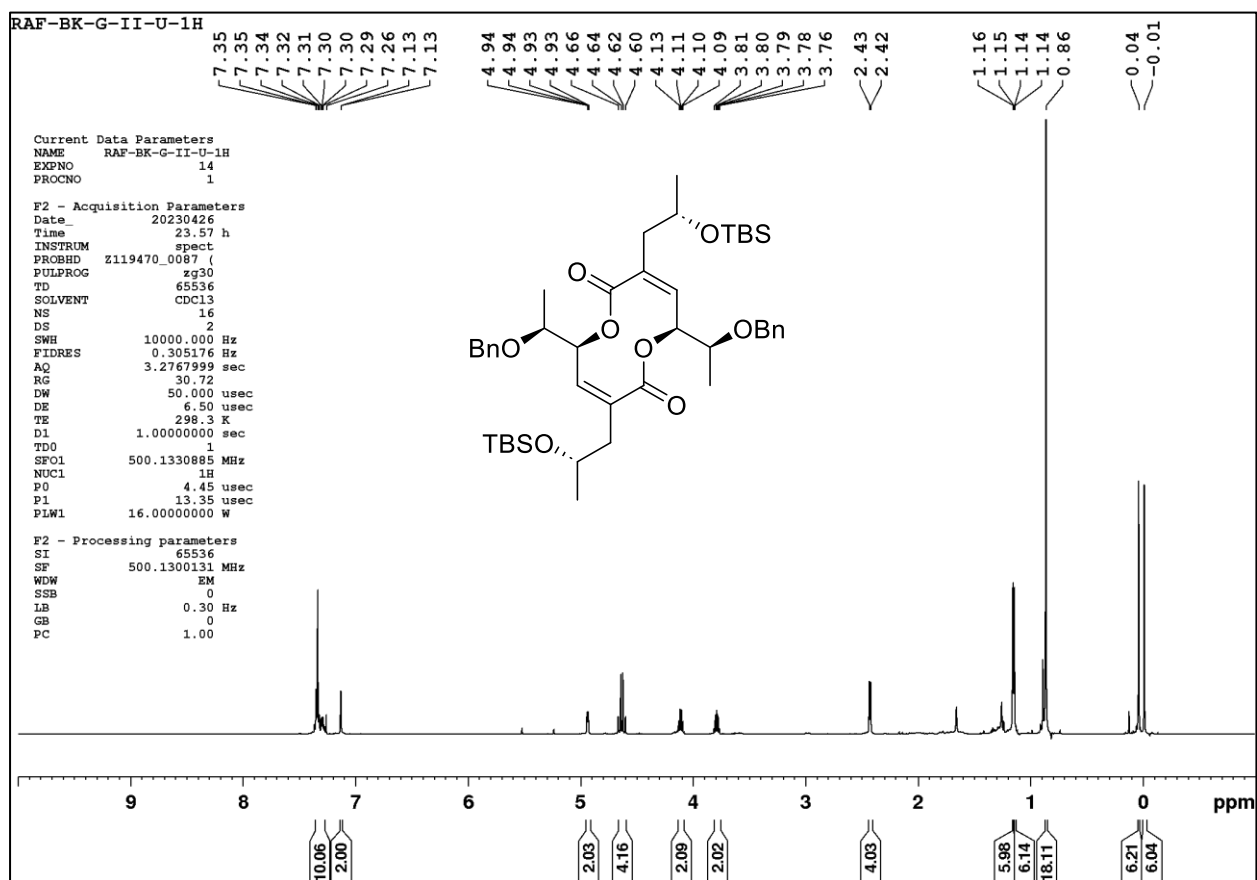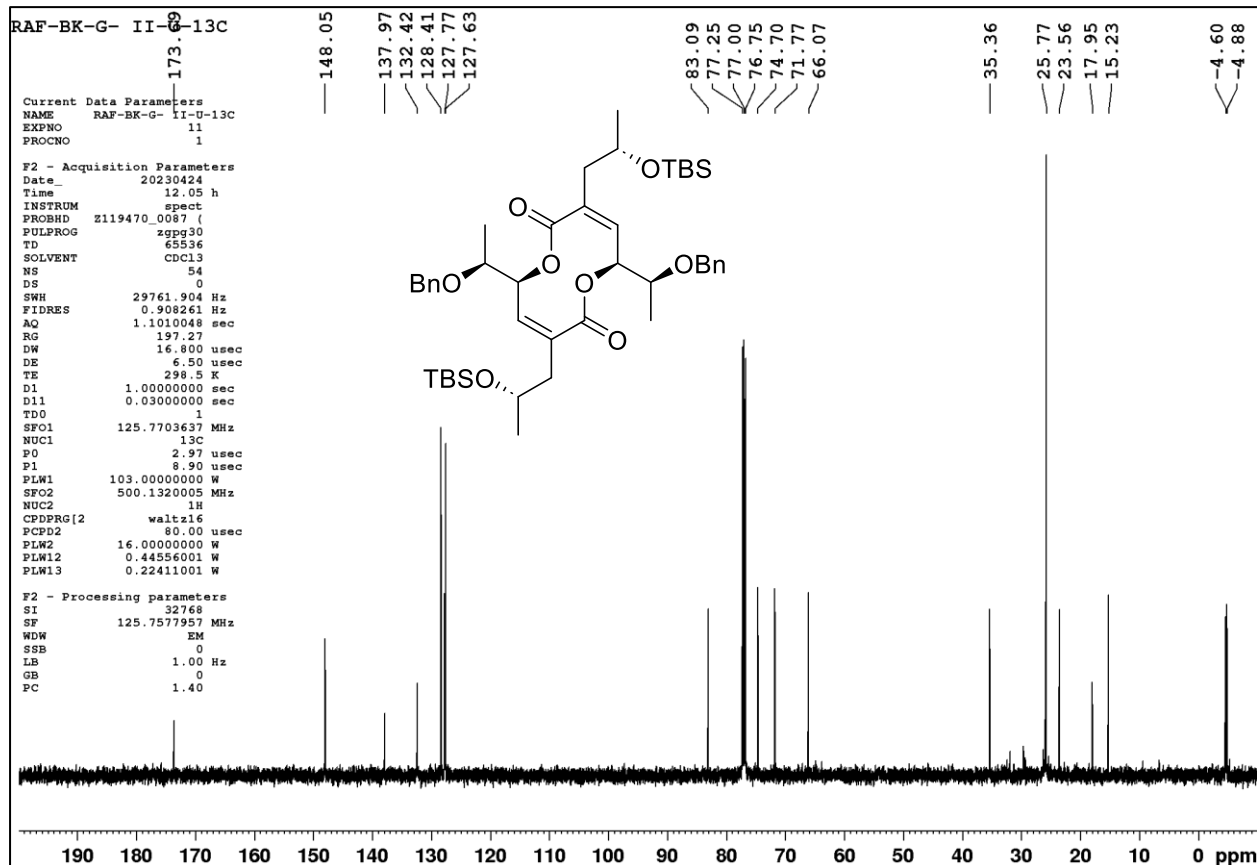

### H-H COSY spectra of compound 13

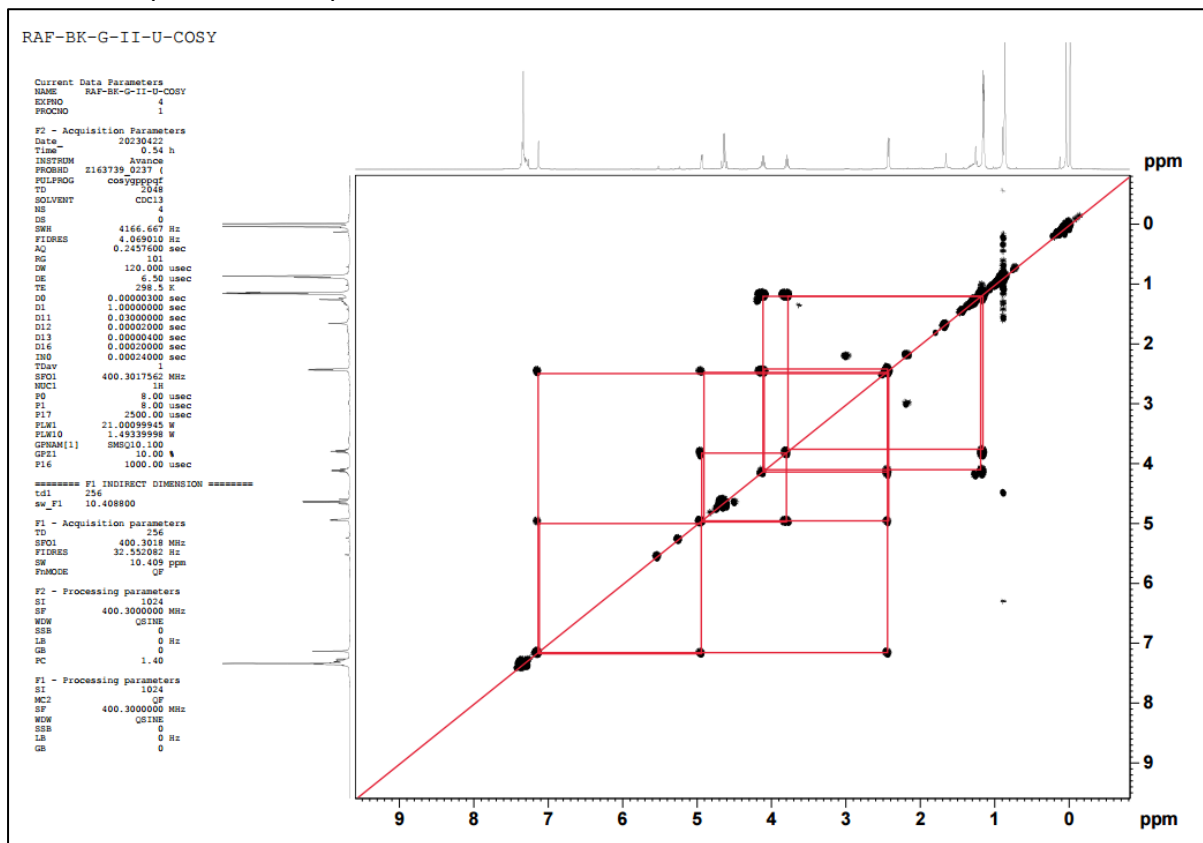

### NOESY spectra of compound 13

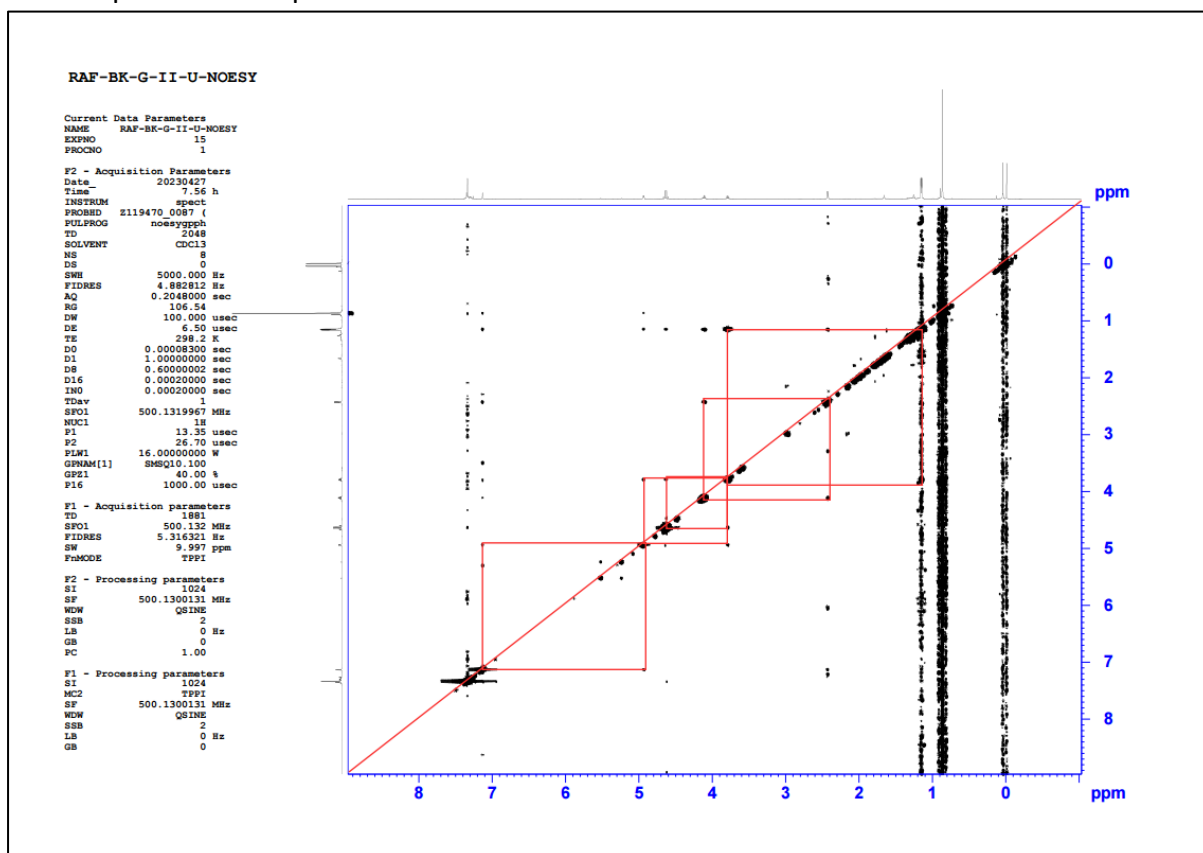

### HSQC spectra of compound 13

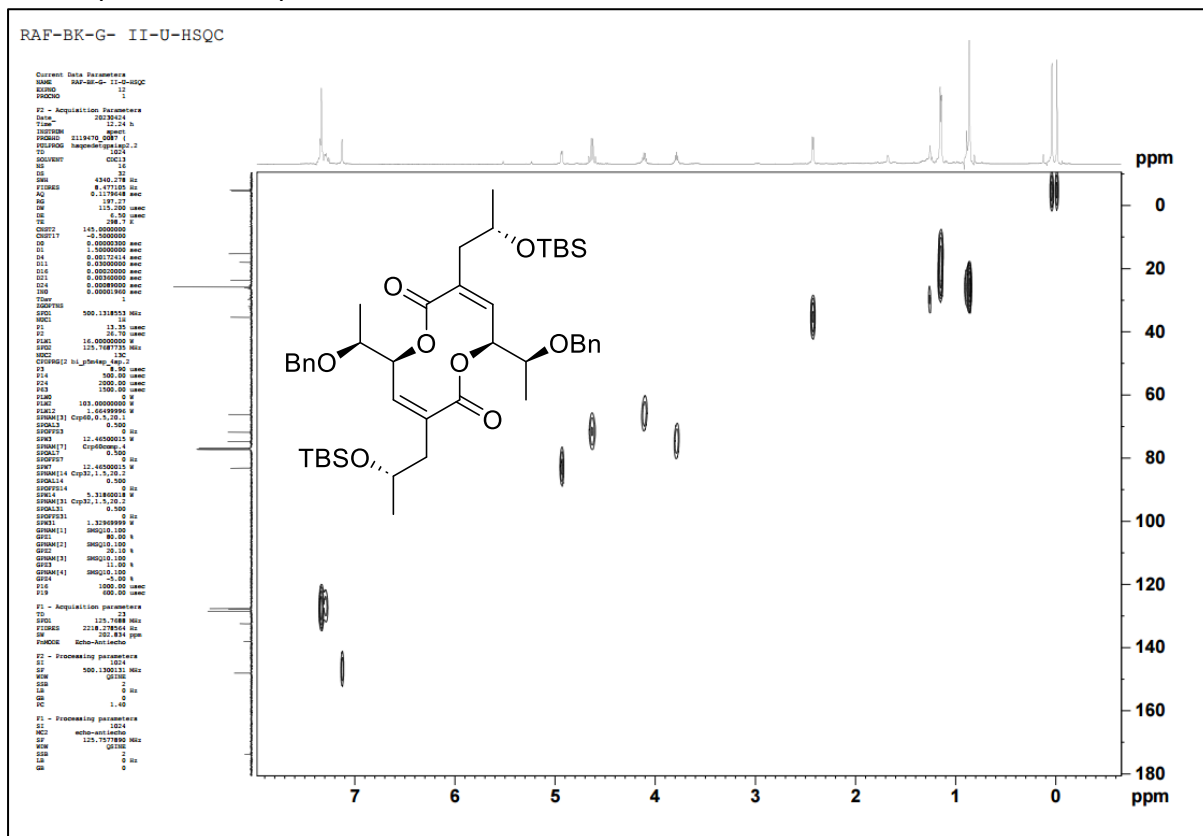

**13:** HRMS (Q-TOF)  $m/z$ :  $[M + Na]^+$  Calcd for  $C_{44}H_{68}O_8Si_2Na$  803.4345; Found 803.4348.

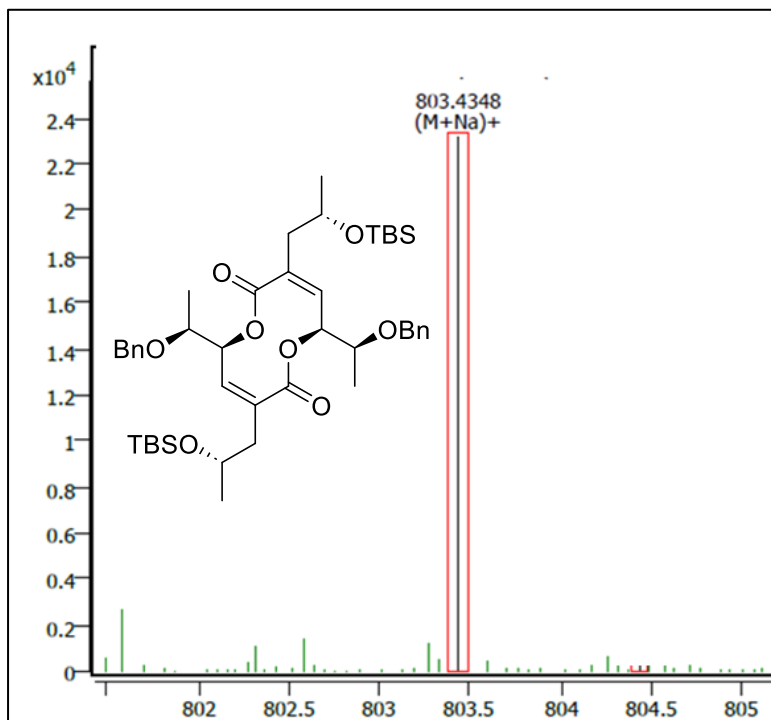



<sup>1</sup>H NMR (500 MHz, CDCl<sub>3</sub>) and <sup>13</sup>C{<sup>1</sup>H} NMR (125 MHz, CDCl<sub>3</sub>) of compound **2a**

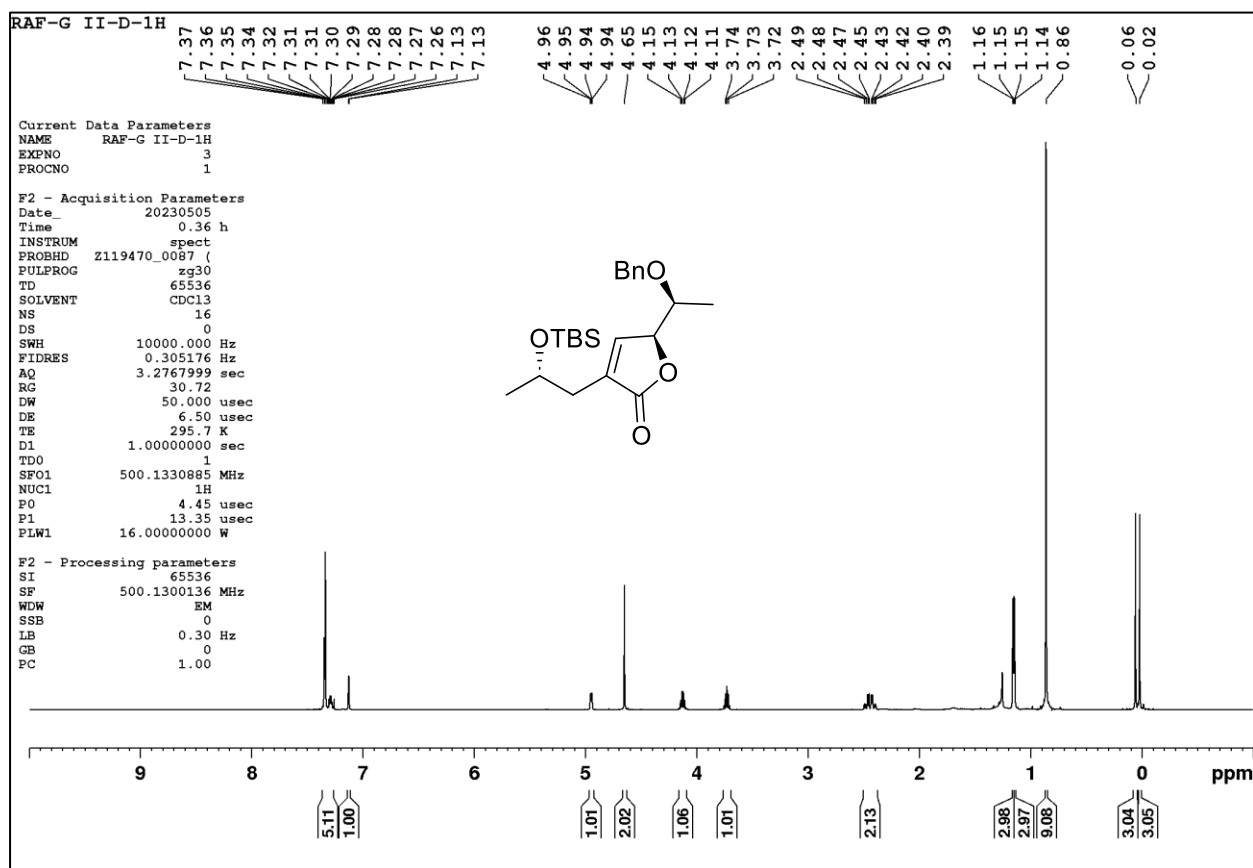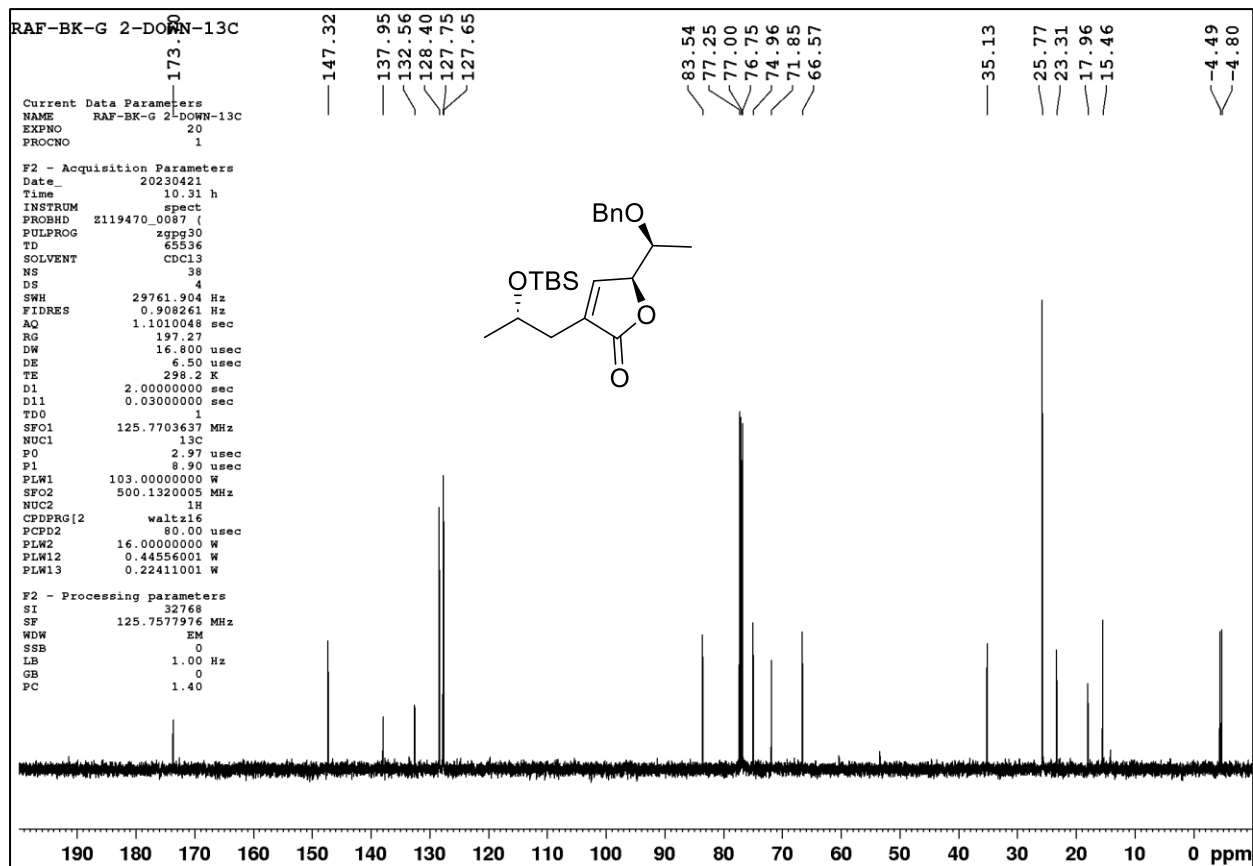

## H-H COSY spectra of compound 2a

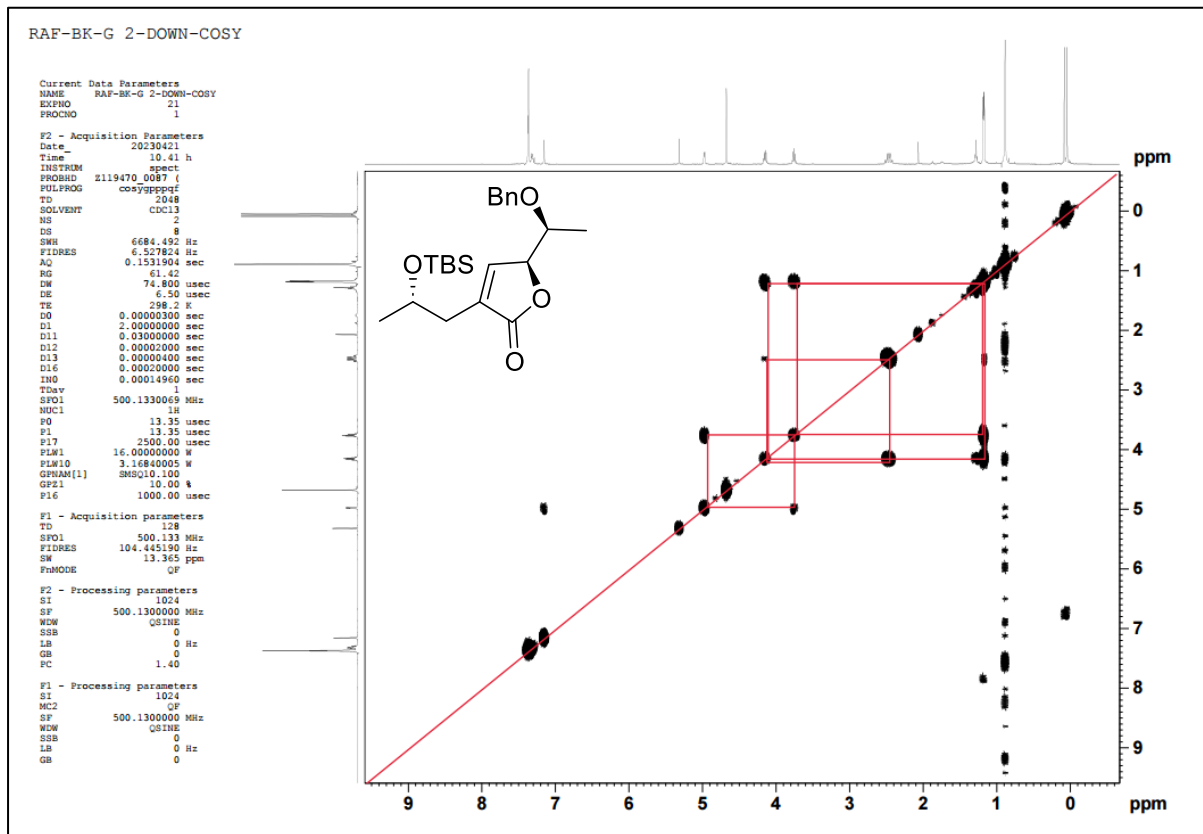

## NOESY spectra of compound 2a

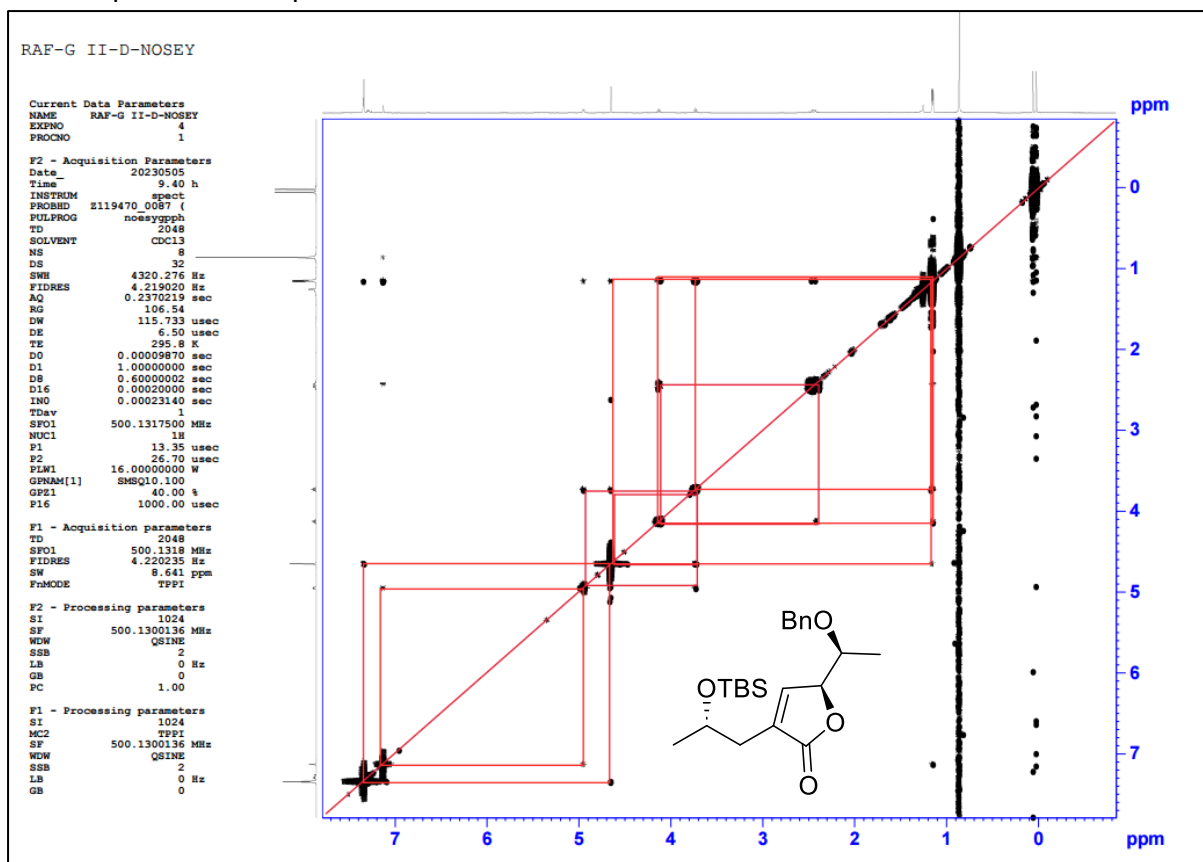



<sup>1</sup>H NMR (500 MHz, CDCl<sub>3</sub>) and <sup>13</sup>C{<sup>1</sup>H} NMR (125 MHz, CDCl<sub>3</sub>) of compound **2b**

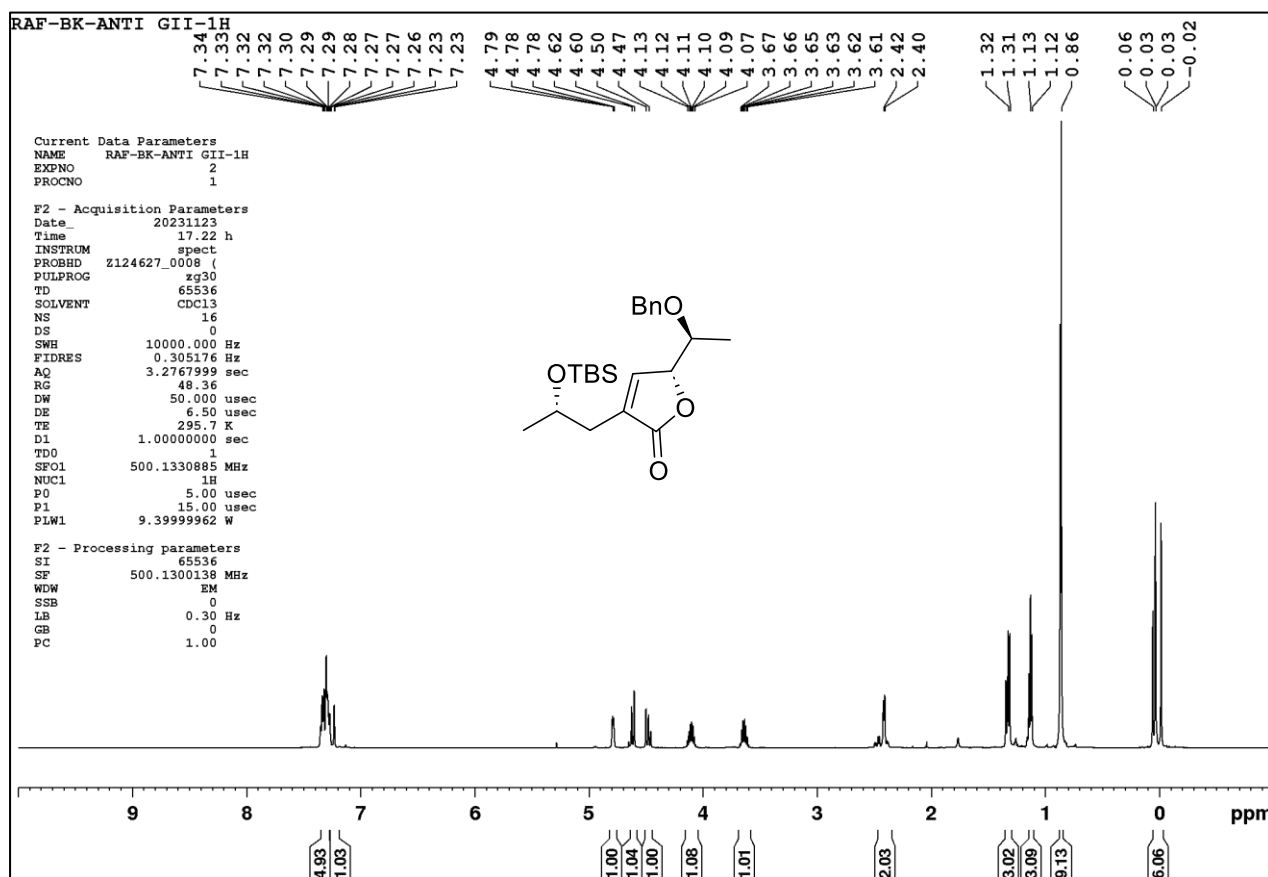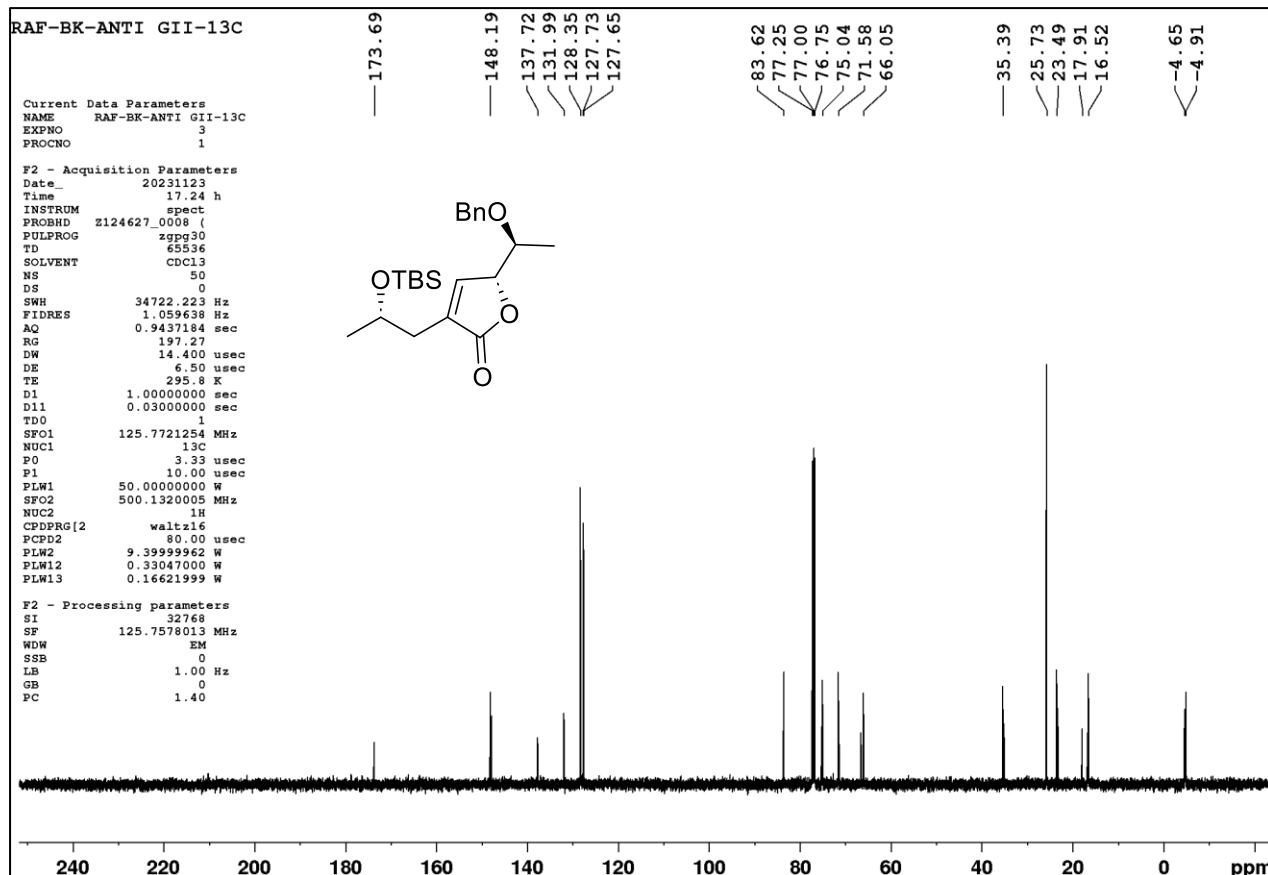

**2b:** HRMS (Q-TOF)  $m/z$ :  $[M + H]^+$  Calcd for  $C_{22}H_{35}O_4Si$  391.2300; Found 391.2297.

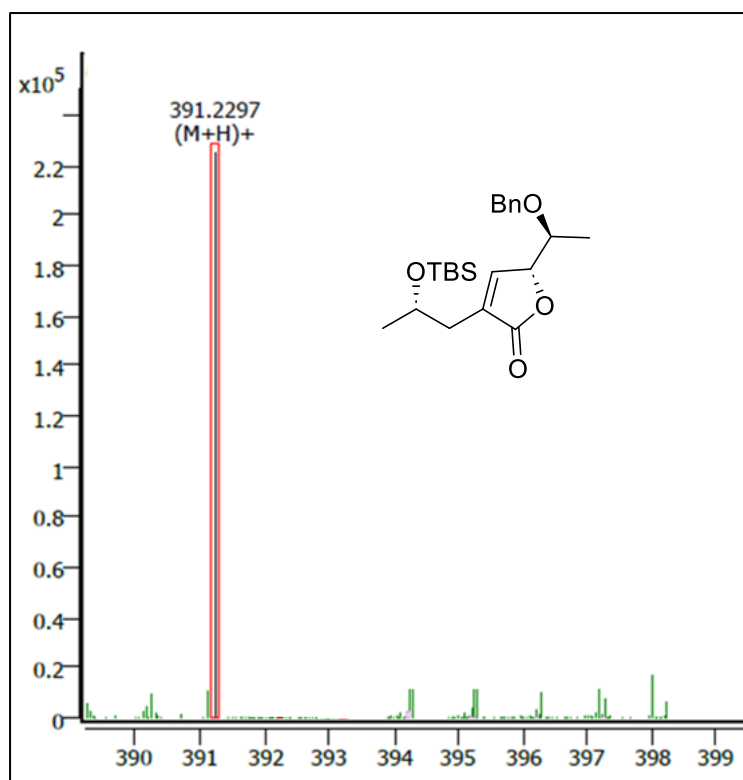

$^1\text{H}$  NMR (500 MHz,  $\text{CDCl}_3$ ) and  $^{13}\text{C}\{^1\text{H}\}$  NMR (125 MHz,  $\text{CDCl}_3$ ) of compound **1a'**

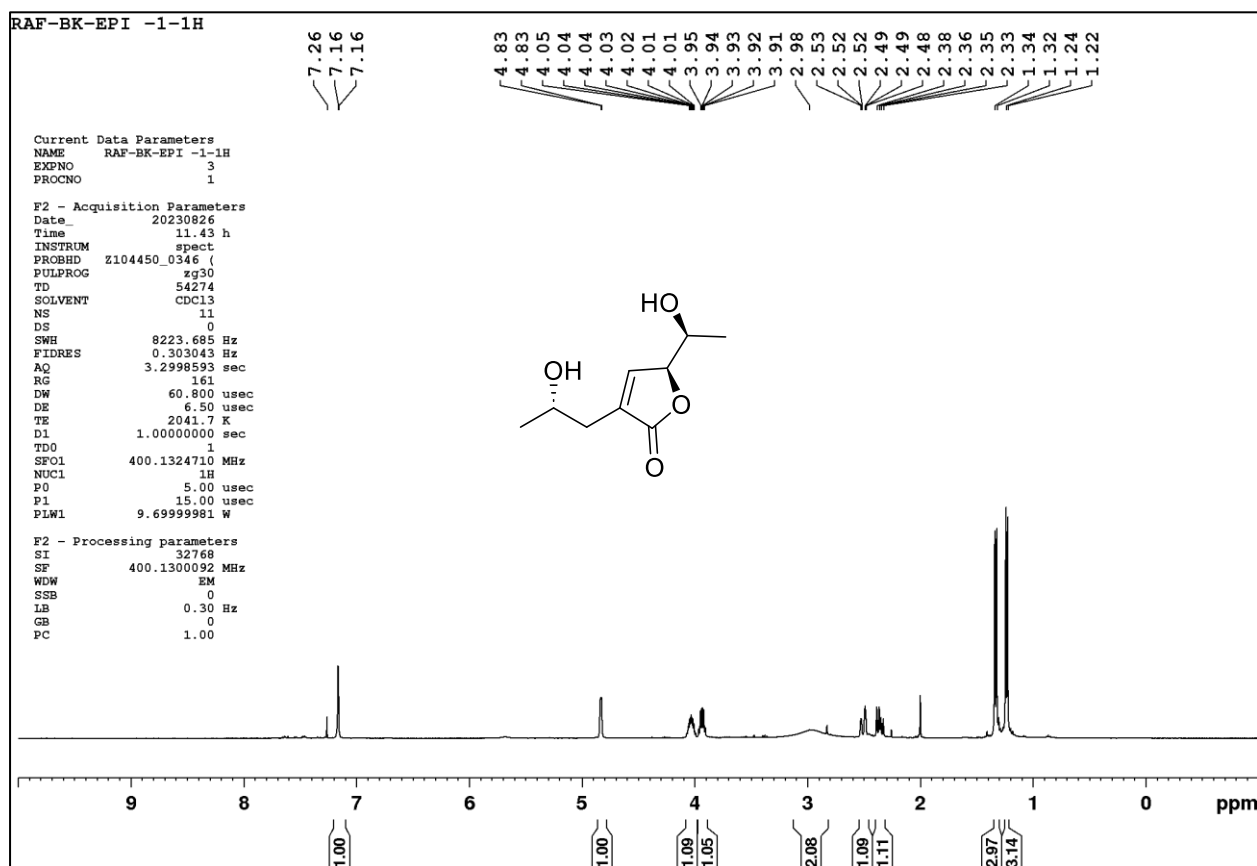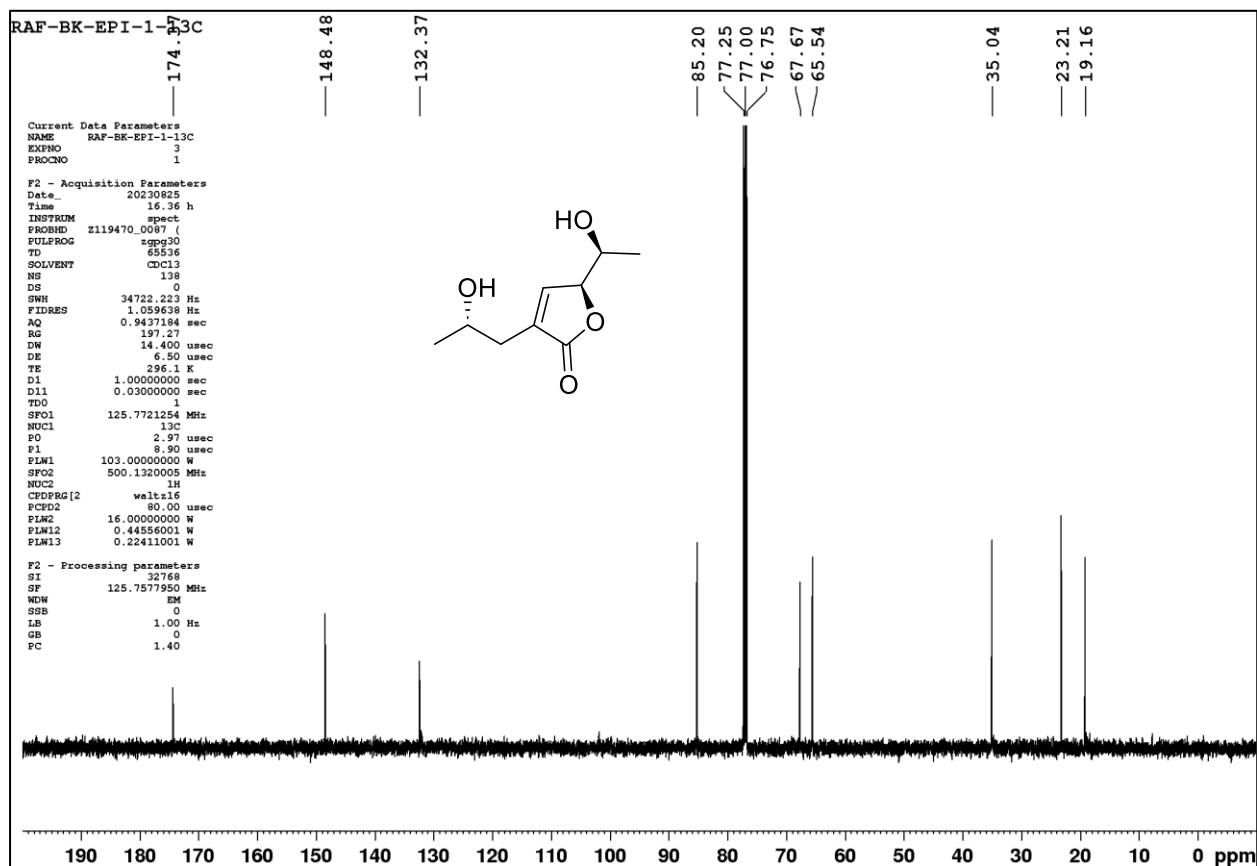

### H-H COSY spectra of compound 1a'

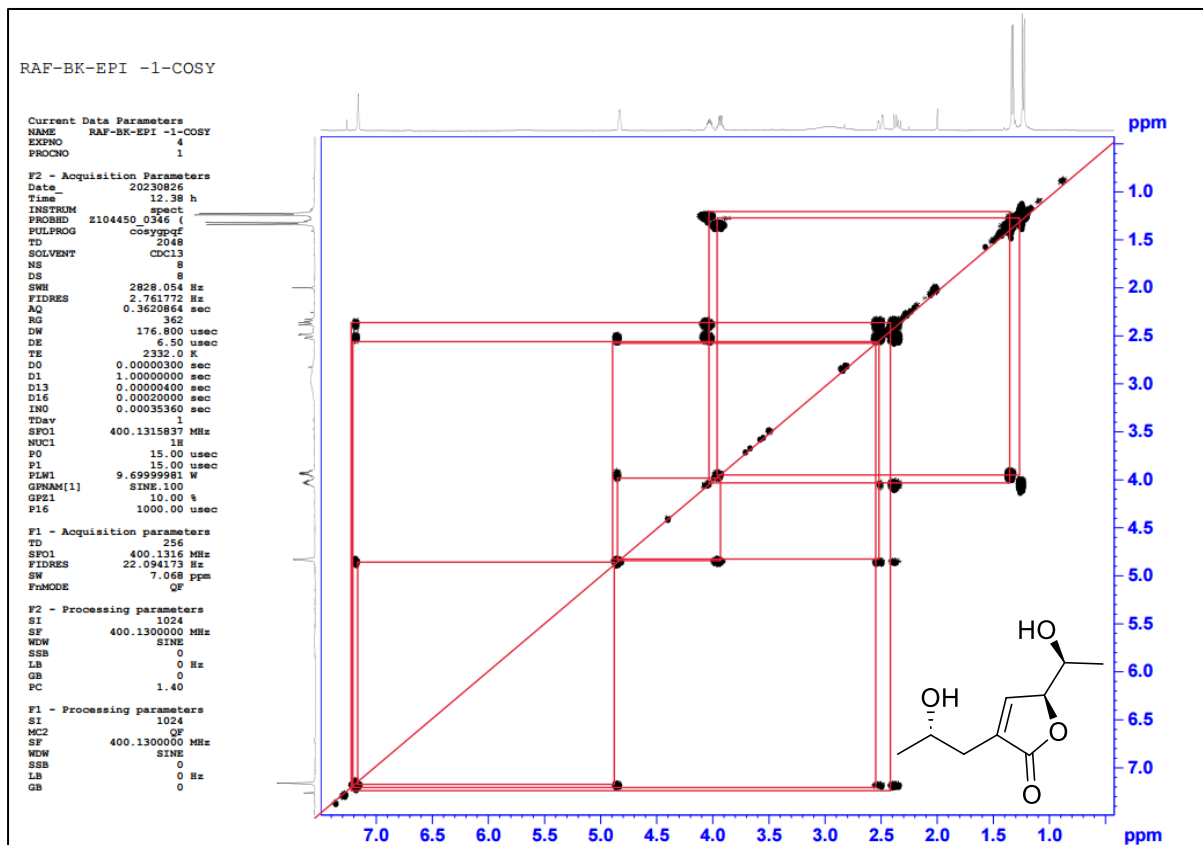

### NOESY spectra of compound 1a'

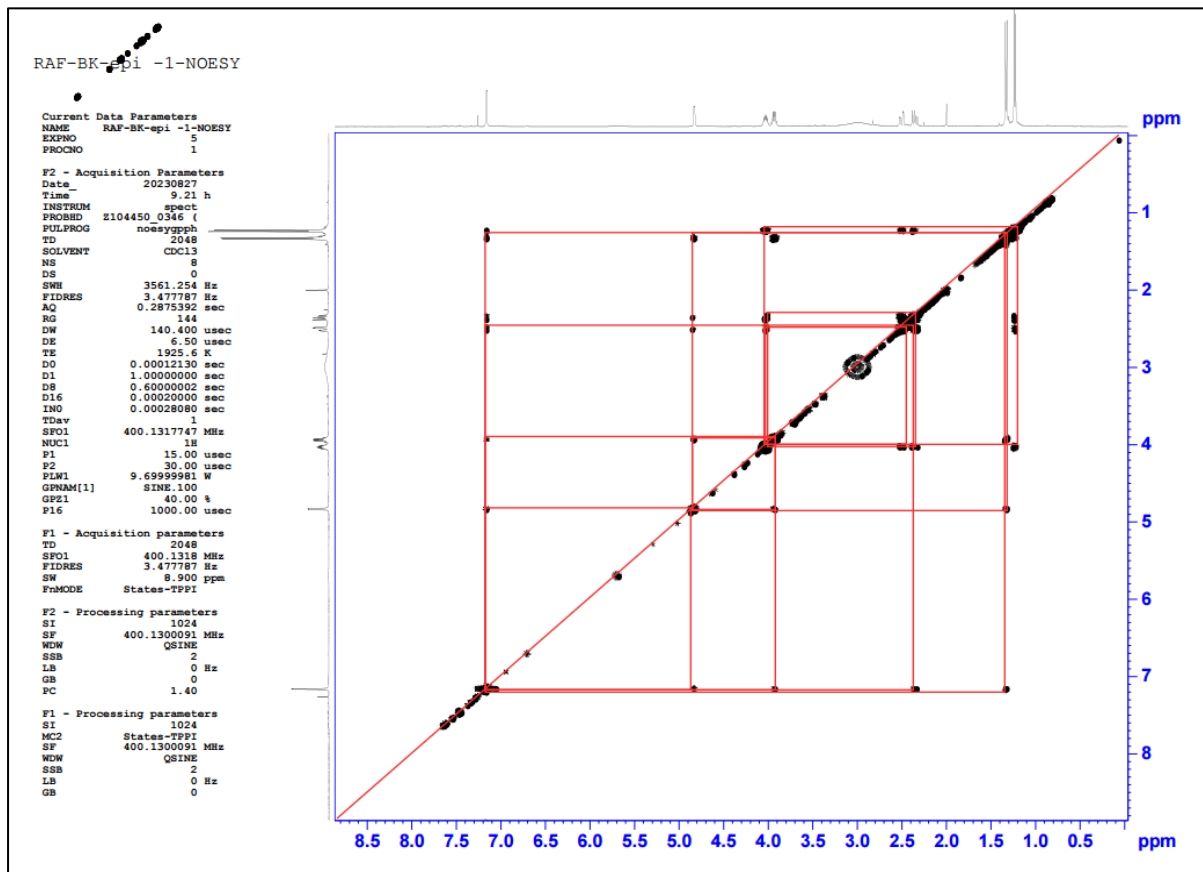

### HSQC spectra of compound 1a'

RAF-BK-epi -1-HSQC

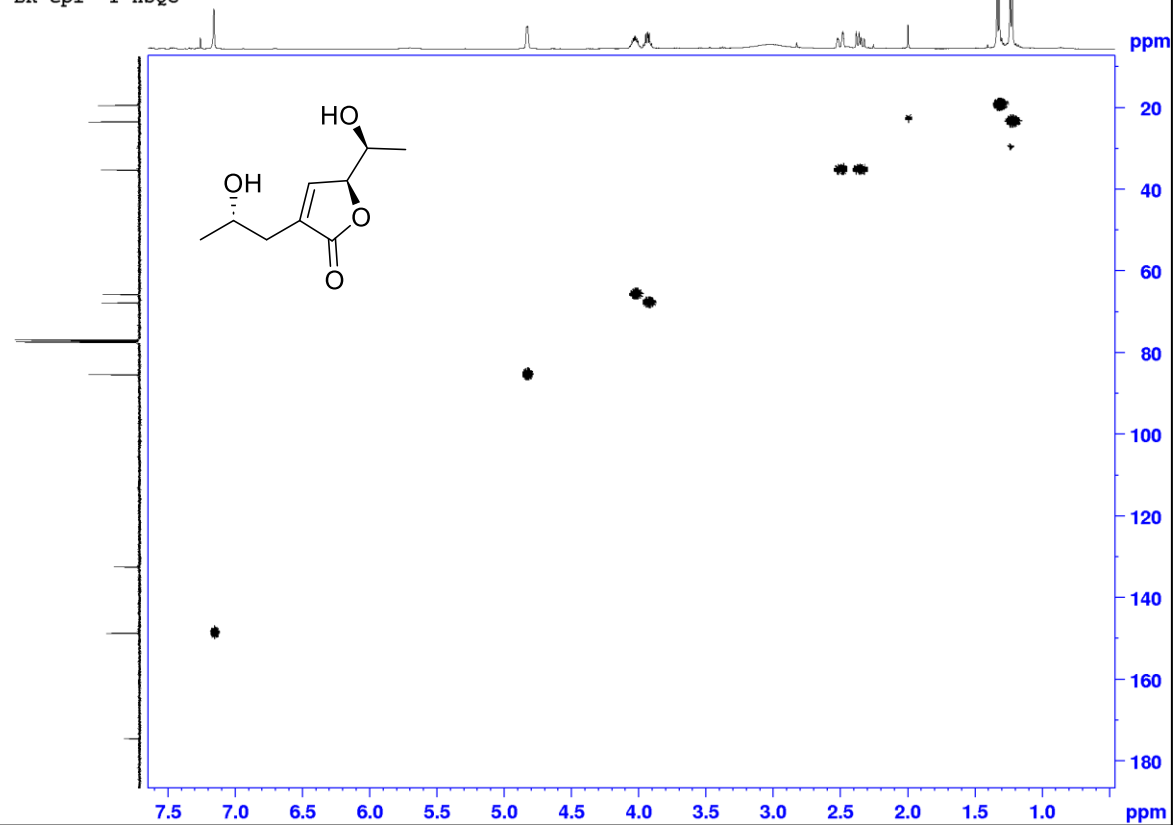

### HMBC spectra of compound 1a'

RAF-BK-epi-1-HMBC

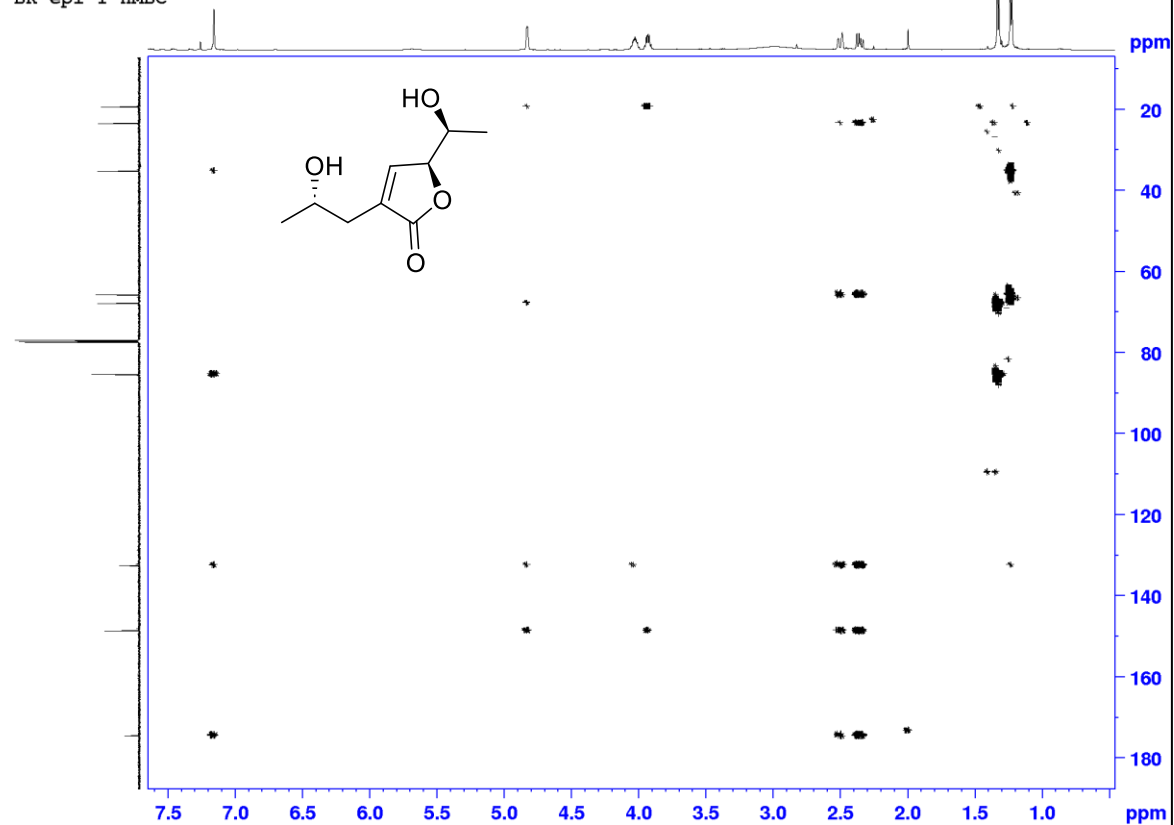



**1a'**: HRMS (Q-TOF)  $m/z$ :  $[M + H]^+$  Calcd for  $C_9H_{15}O_4$  187.0965; Found 187.0965.

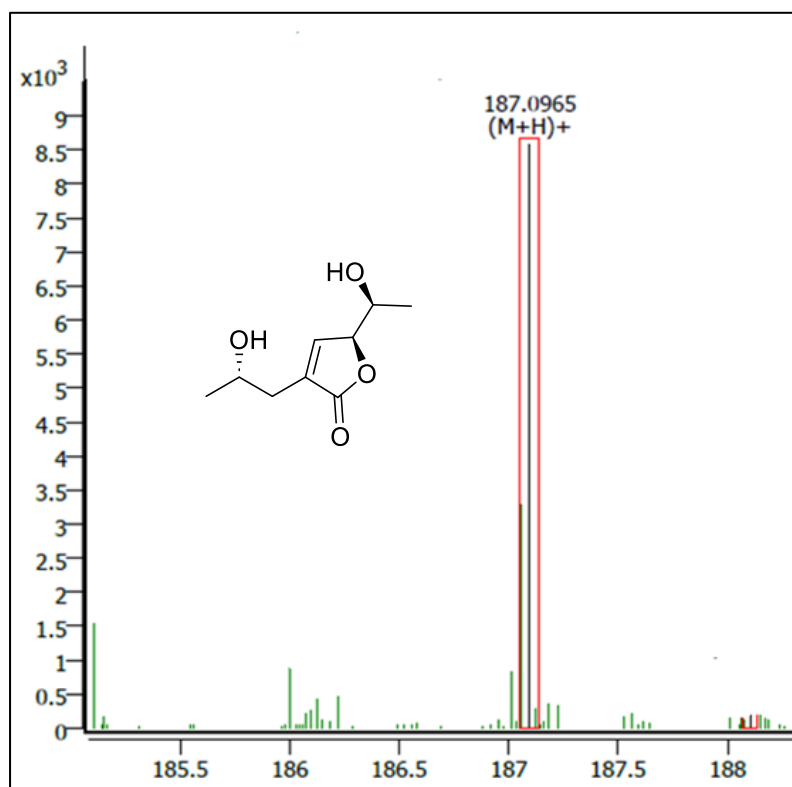

$^1\text{H}$  NMR (500 MHz,  $\text{CDCl}_3$ ) and  $^{13}\text{C}\{^1\text{H}\}$  NMR (125 MHz,  $\text{CDCl}_3$ ) of compound **1a**

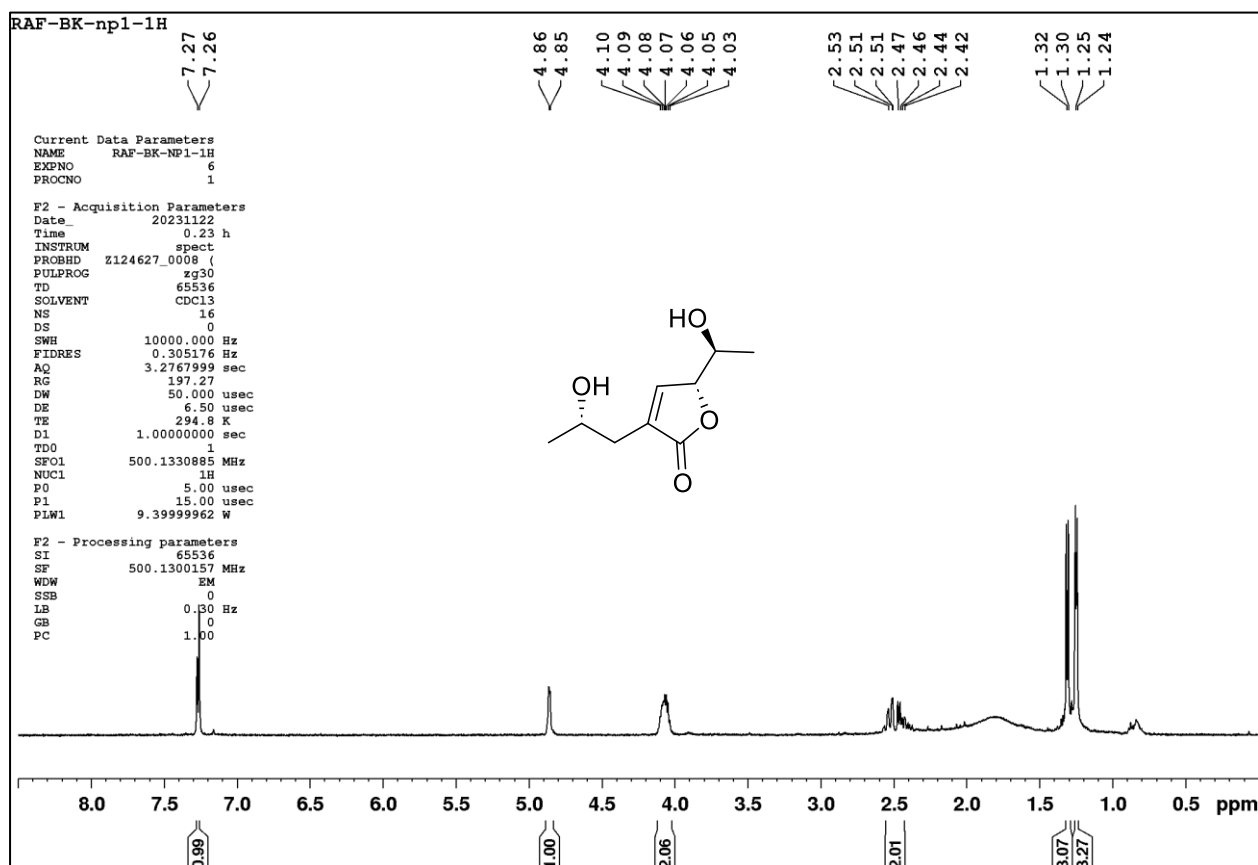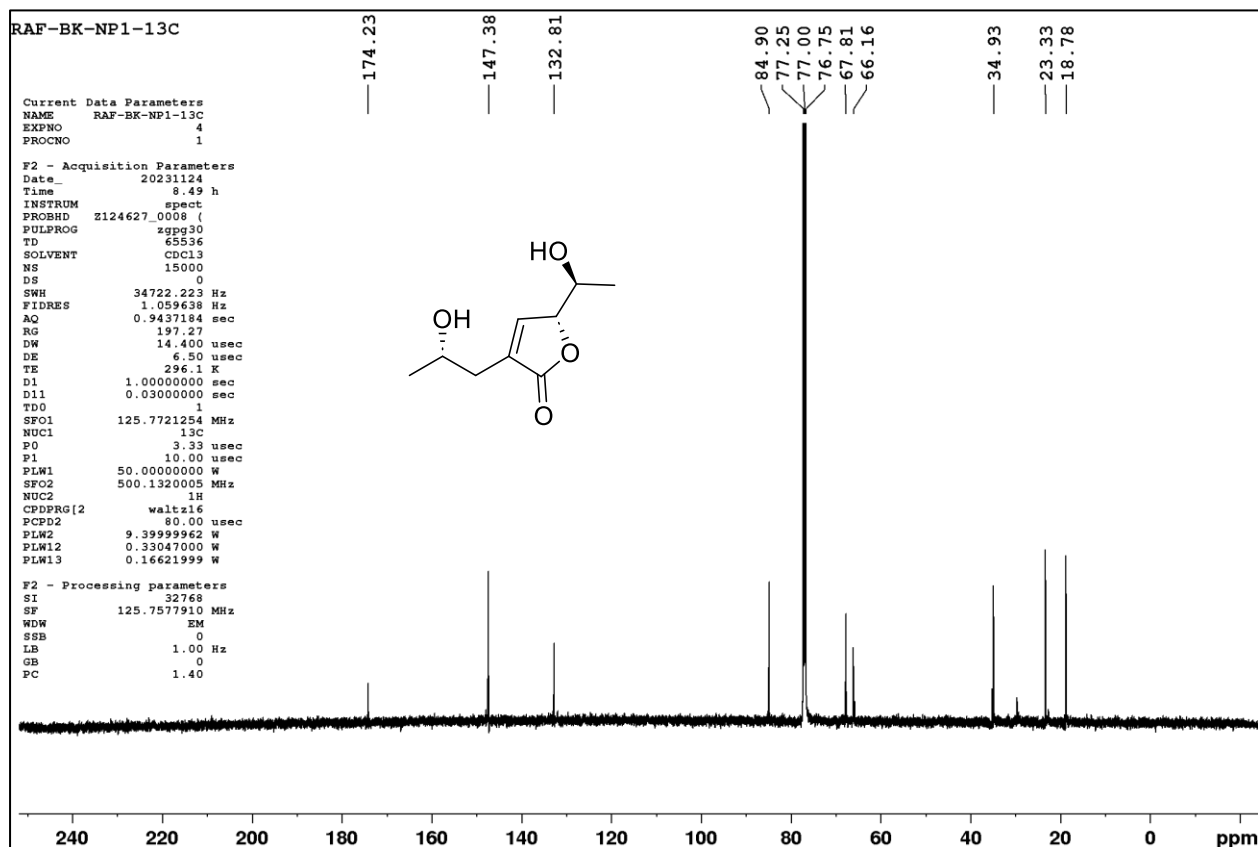

<sup>1</sup>H NMR Comparison data of compound **1a**: Isolated and our work

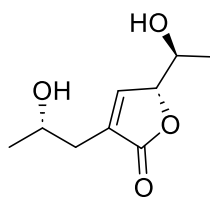

| <sup>1</sup> H NMR (500 MHz, CDCl <sub>3</sub> )<br>Isolated by Yurchenko<br><i>Mar. Drugs</i> , 2019, 17, 579 | <sup>1</sup> H NMR (500 MHz, CDCl <sub>3</sub> )<br>Our work |
|----------------------------------------------------------------------------------------------------------------|--------------------------------------------------------------|
| 7.27 (d, <i>J</i> = 1.4 Hz, 1H)                                                                                | 7.27 (s, 1H)                                                 |
| 4.85 (dd, <i>J</i> = 4.4, 1.4 Hz, 1H)                                                                          | 4.86 (d, <i>J</i> = 5.0 Hz, 1H)                              |
| 4.08 (m, 1H)                                                                                                   | 4.11–4.02 (m, 2H)                                            |
| 4.05 (qd, <i>J</i> = 6.4, 4.4 Hz, 1H)                                                                          |                                                              |
| 2.52 (ddt, <i>J</i> = 15.0, 3.8, 1.4 Hz, 1H)                                                                   | 2.57–2.37 (m, 2H)                                            |
| 2.45 (ddt, <i>J</i> = 15.0, 7.8, 1.4 Hz, 1H)                                                                   |                                                              |
| 1.31 (d, <i>J</i> = 6.4 Hz, 3H)                                                                                | 1.30 (d, <i>J</i> = 6.7 Hz, 3H)                              |
| 1.25 (d, <i>J</i> = 6.3 Hz, 3H)                                                                                | 1.25 (d, <i>J</i> = 6.2 Hz, 3H)                              |

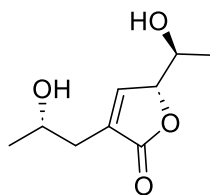

<sup>13</sup>C NMR Comparison data of compound **1a**: Isolated and our work

| <sup>13</sup> C NMR (125 MHz, CDCl <sub>3</sub> )<br>Isolated by Yurchenko<br><i>Mar. Drugs</i> , 2019, 17, 579. | <sup>13</sup> C NMR (125 MHz, CDCl <sub>3</sub> )<br>Our work |
|------------------------------------------------------------------------------------------------------------------|---------------------------------------------------------------|
| 174.2                                                                                                            | 174.2                                                         |
| 147.4                                                                                                            | 147.4                                                         |
| 132.8                                                                                                            | 132.8                                                         |
| 84.9                                                                                                             | 84.9                                                          |
| 67.8                                                                                                             | 67.8                                                          |
| 66.2                                                                                                             | 66.2                                                          |
| 34.9                                                                                                             | 34.9                                                          |
| 23.3                                                                                                             | 23.3                                                          |
| 18.8                                                                                                             | 18.8                                                          |

### H-H COSY spectra of compound 1a

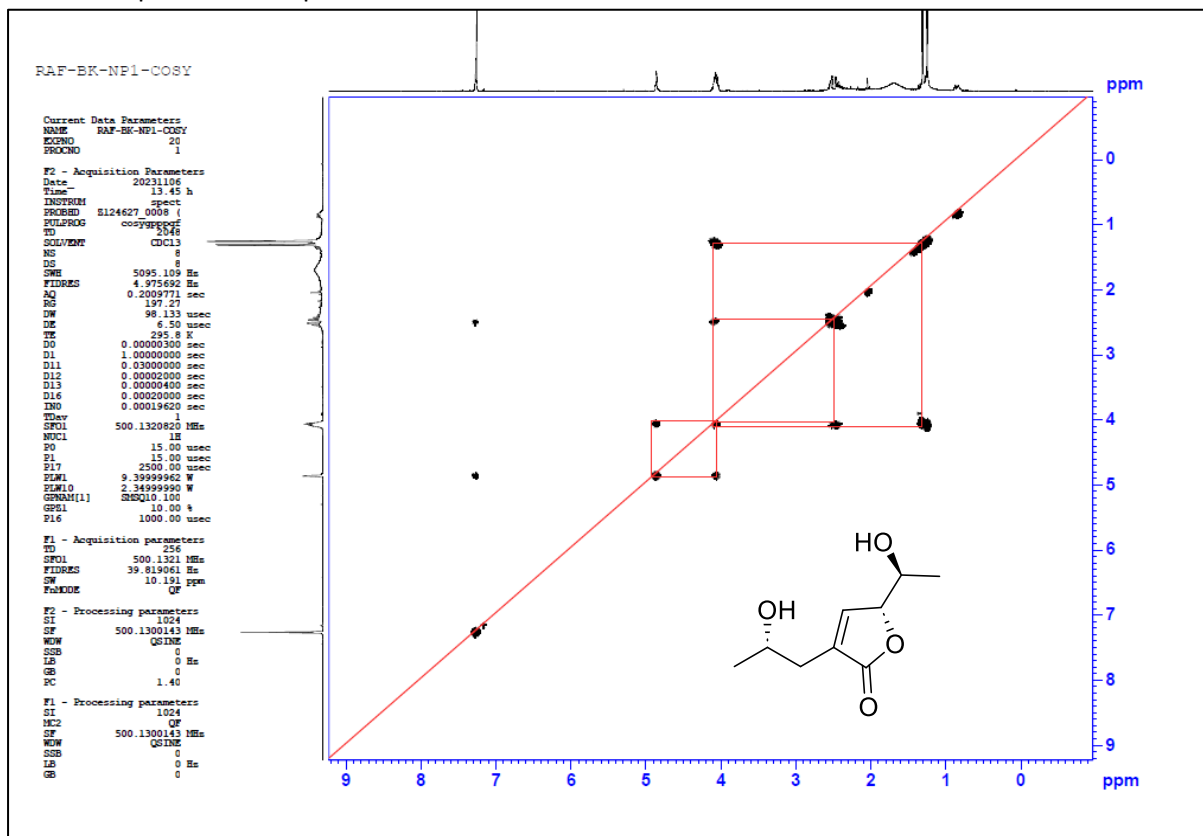

### NOESY spectra of compound 1a

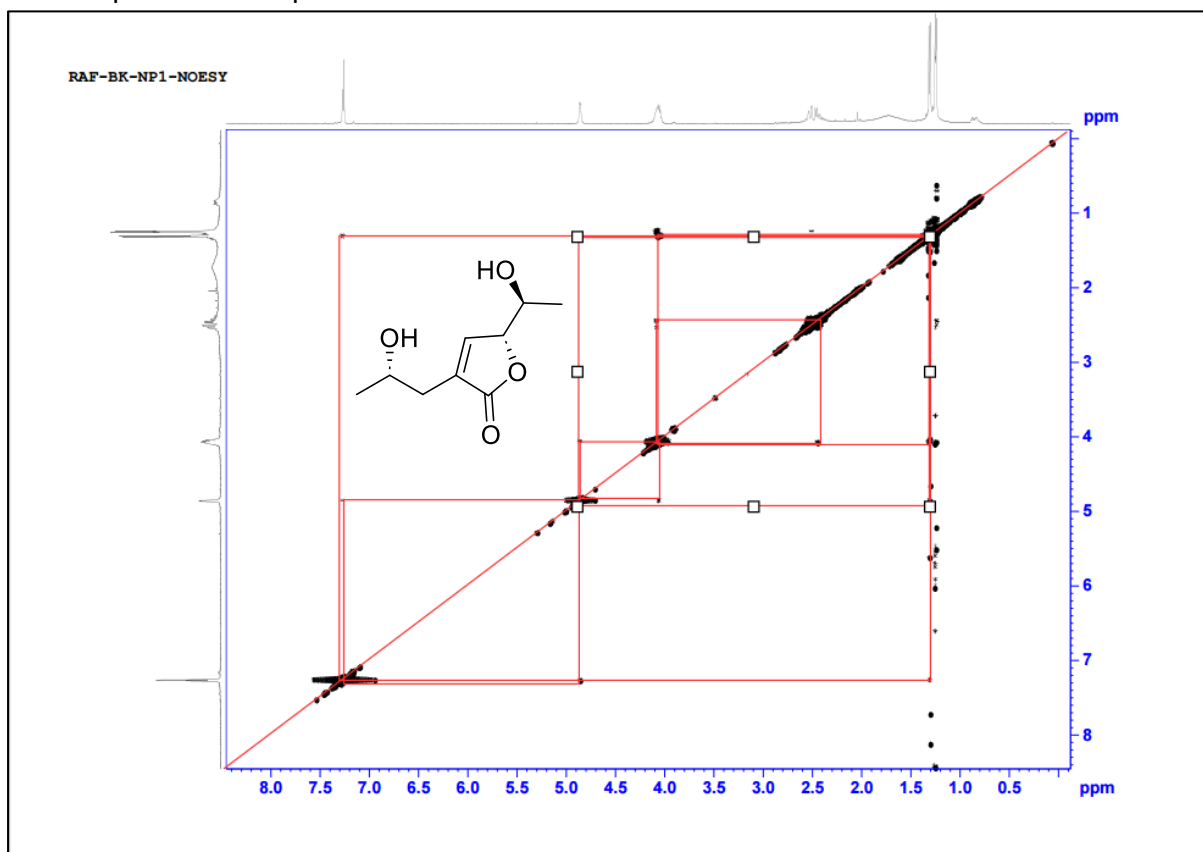

### HSQC spectra of compound 1a

RAF-BK-np1-HSQC

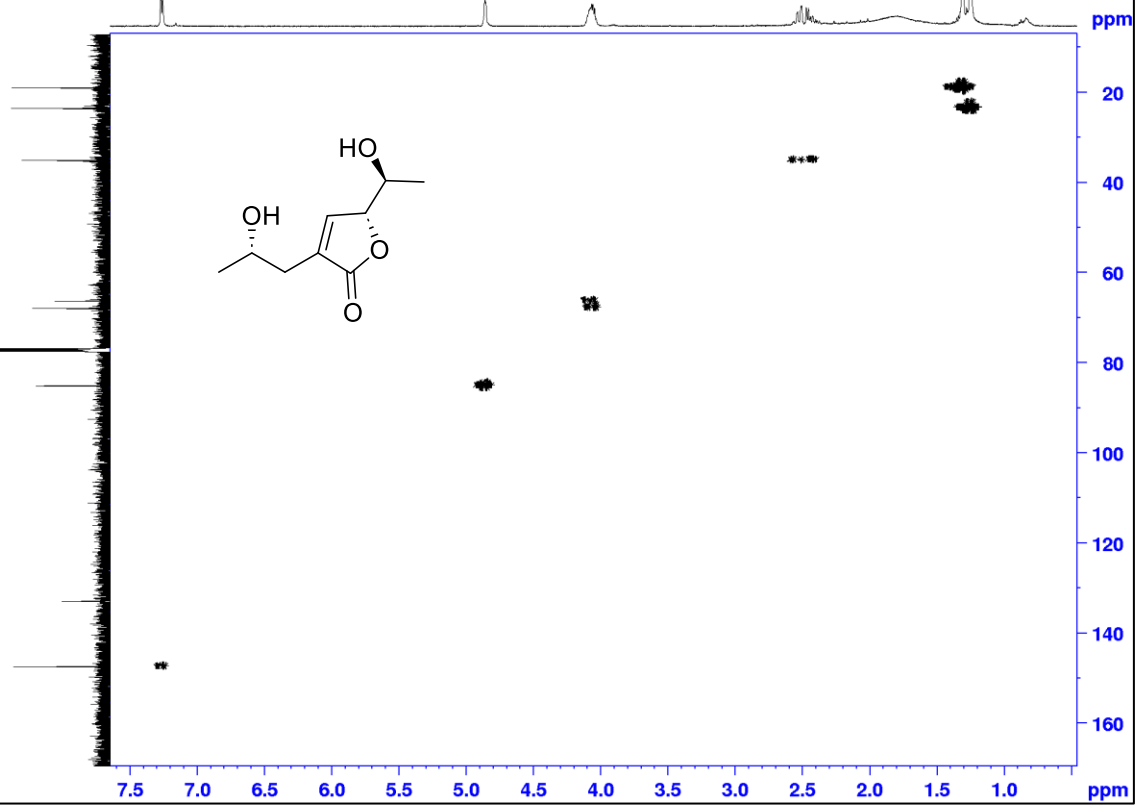

### HSBC spectra of compound 1a

RAF-BK-np1-MHBC

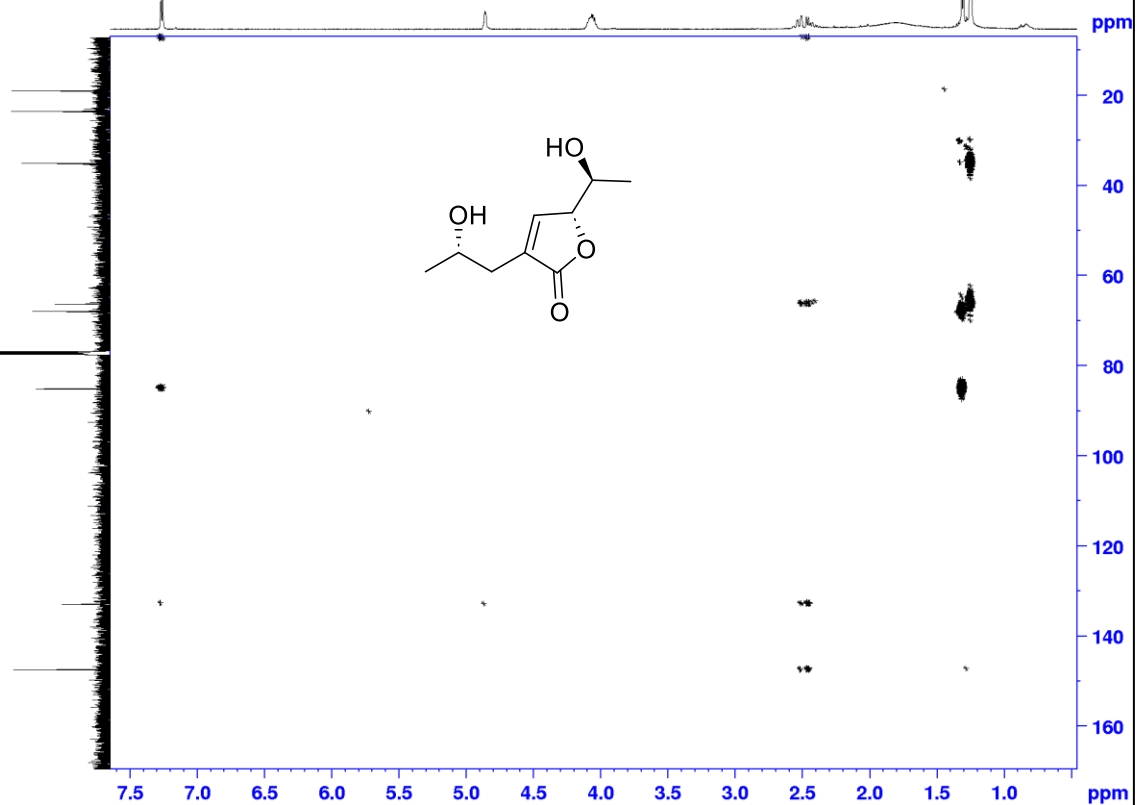

**1a:** HRMS (Q-TOF)  $m/z$ :  $[M + H]^+$  Calcd for  $C_9H_{15}O_4$  187.0965; Found 187.0962.

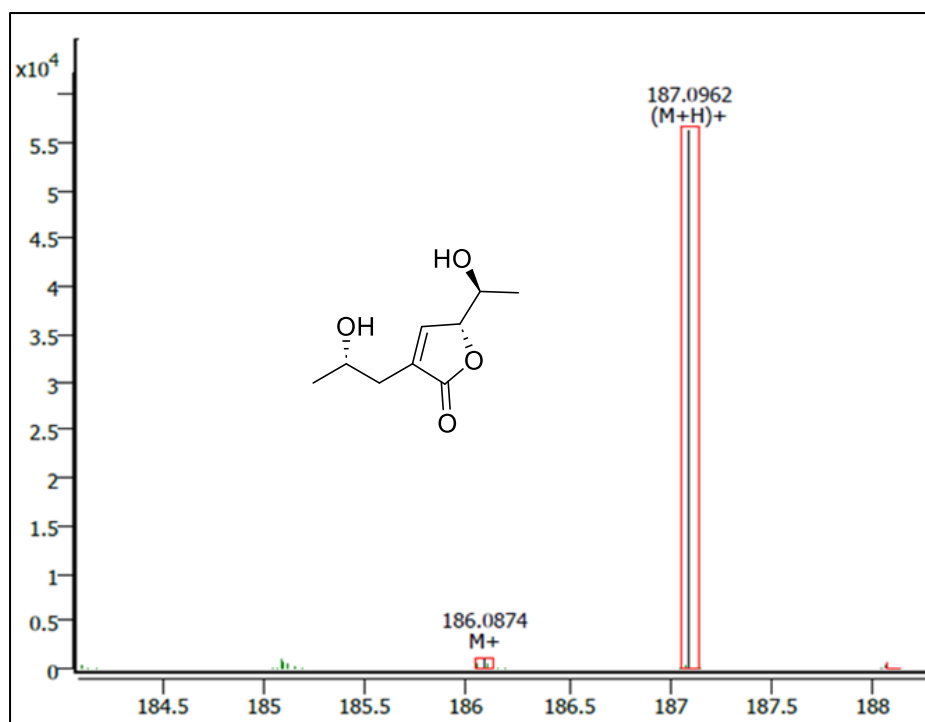

$^1\text{H}$  NMR (500 MHz,  $\text{CDCl}_3$ ) and  $^{13}\text{C}\{^1\text{H}\}$  NMR (125 MHz,  $\text{CDCl}_3$ ) of compound **14a**

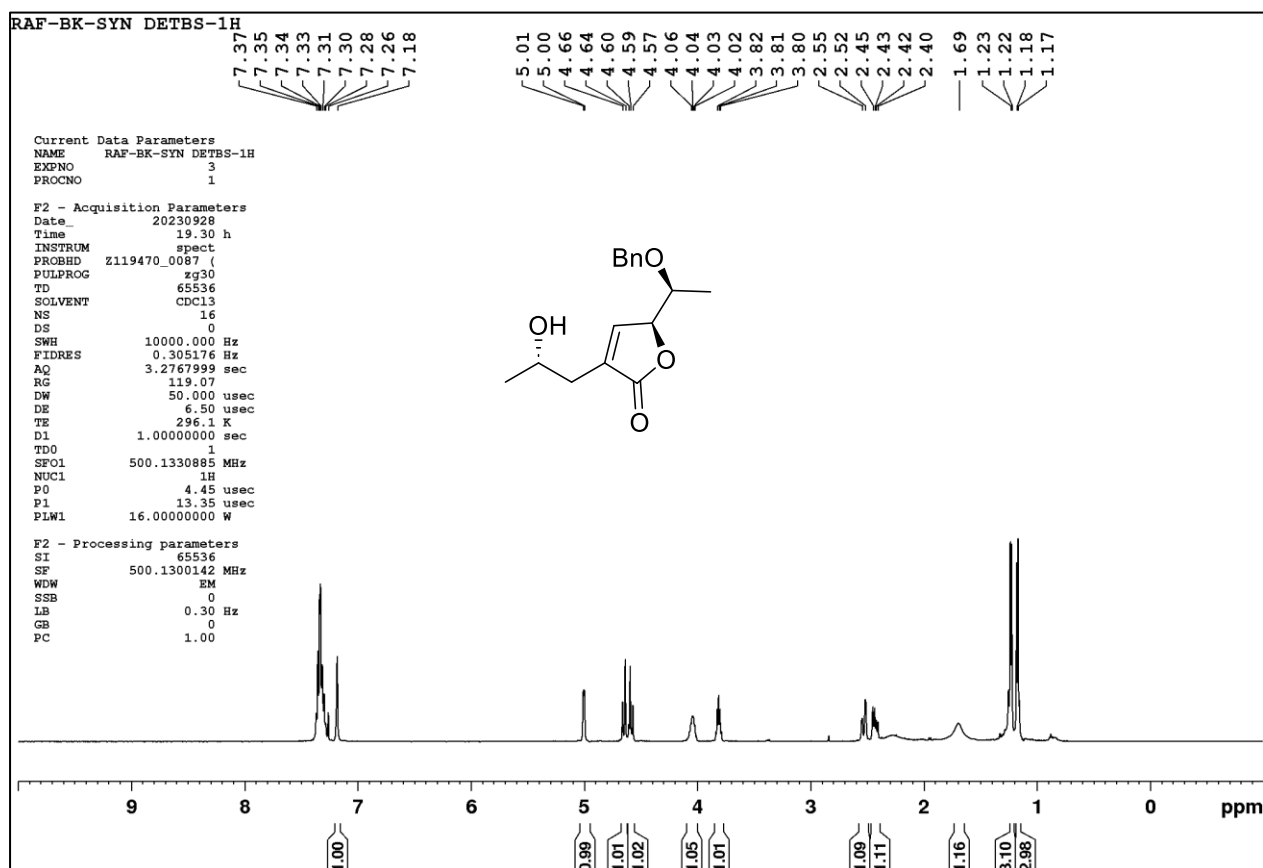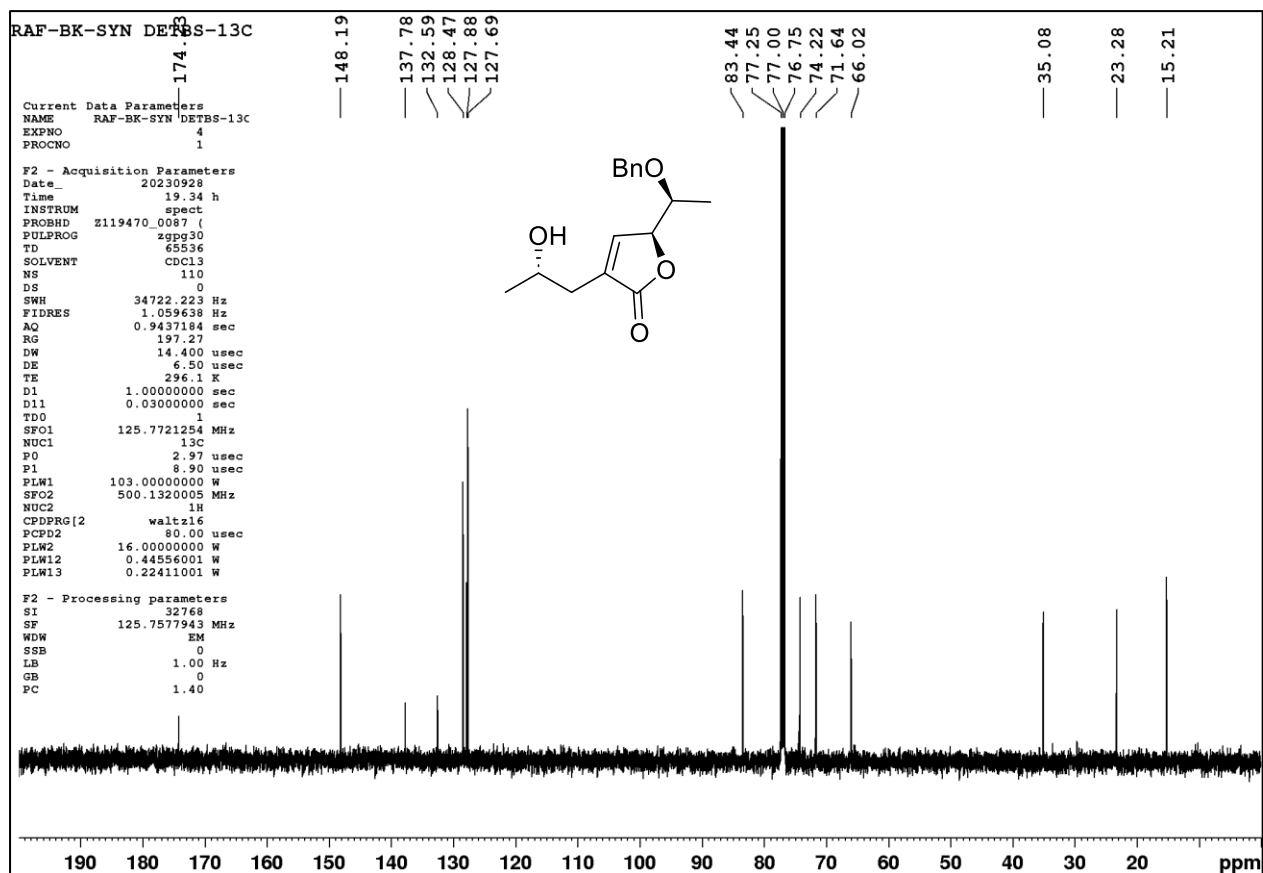

**14a:** HRMS (Q-TOF)  $m/z$ :  $[M + H]^+$  Calcd for  $C_{16}H_{21}O_4$  277.1435; Found 277.1442.

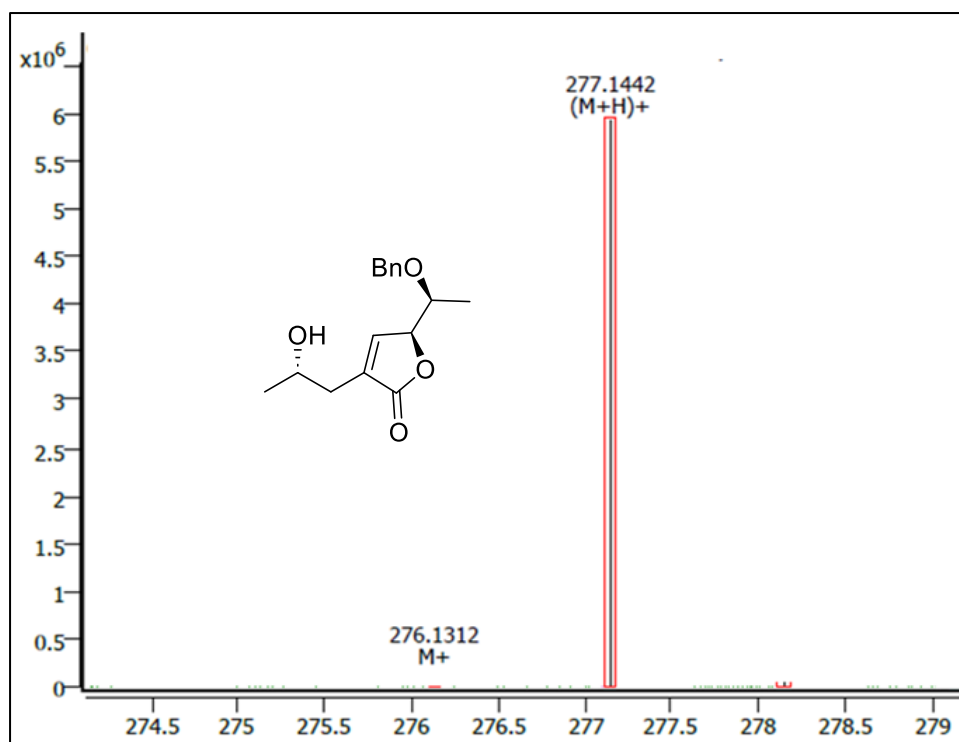



<sup>1</sup>H NMR (400 MHz, CDCl<sub>3</sub>) and <sup>13</sup>C{<sup>1</sup>H} NMR (100 MHz, CDCl<sub>3</sub>) of compound **14b**

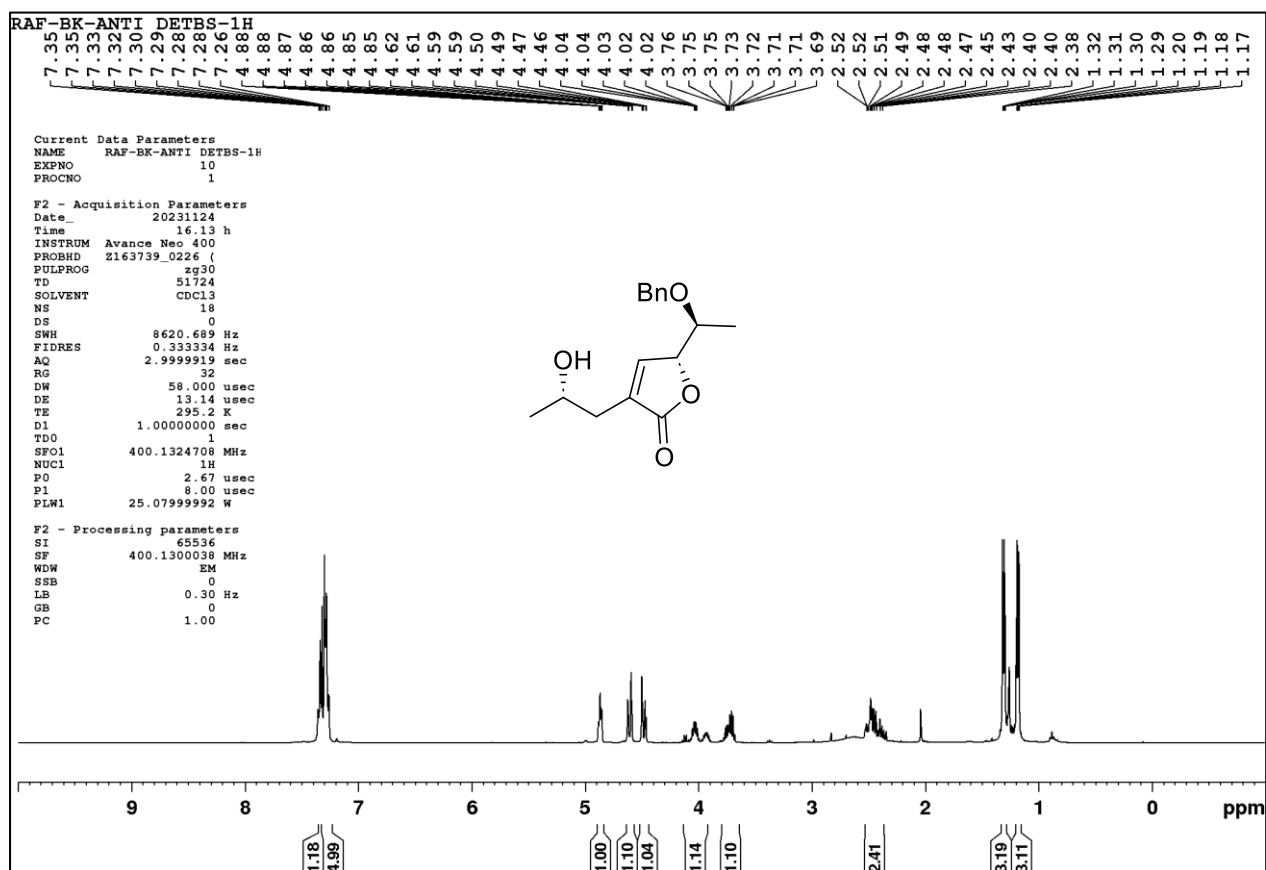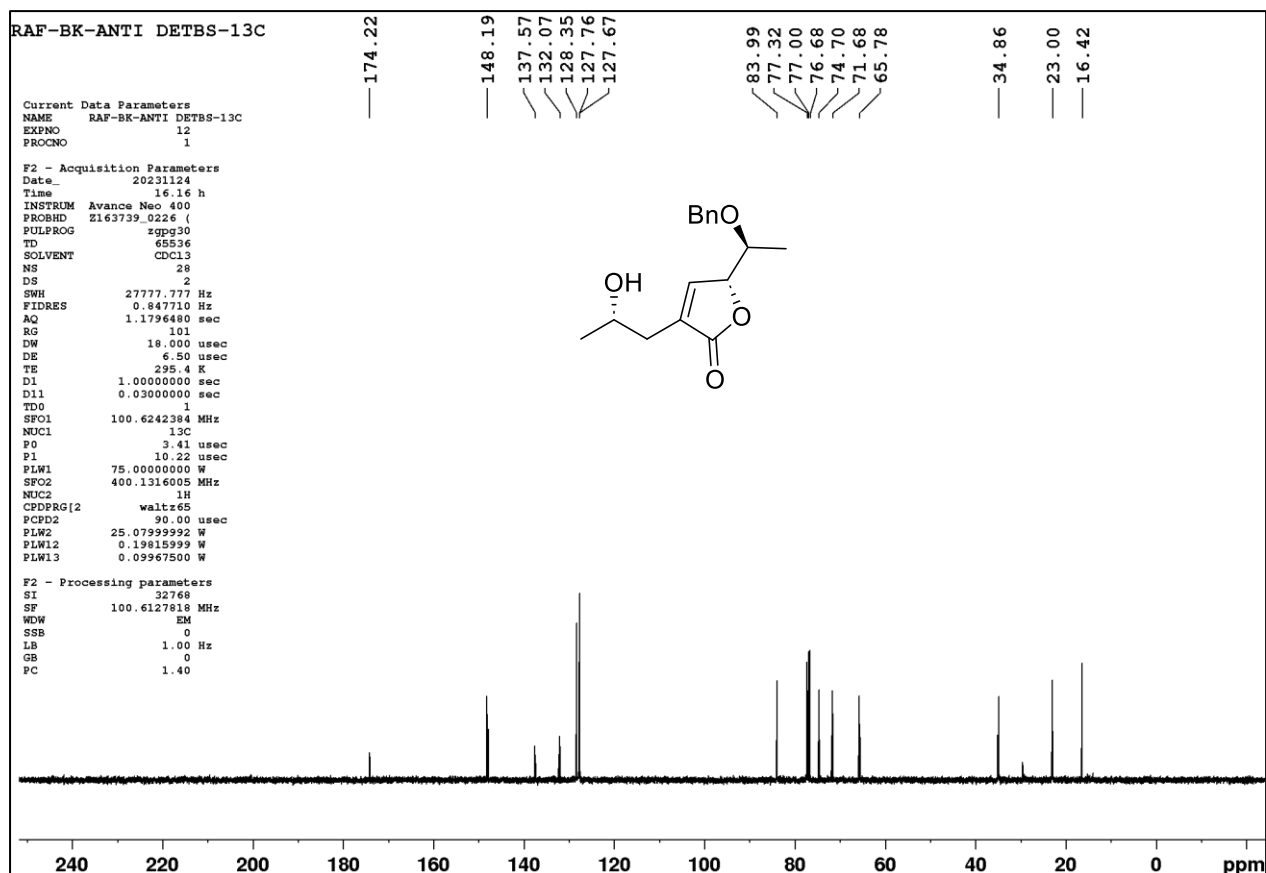

**14b:** HRMS (Q-TOF)  $m/z$ :  $[M + H]^+$  Calcd for  $C_{16}H_{21}O_4$  277.1435; Found 277.1440.

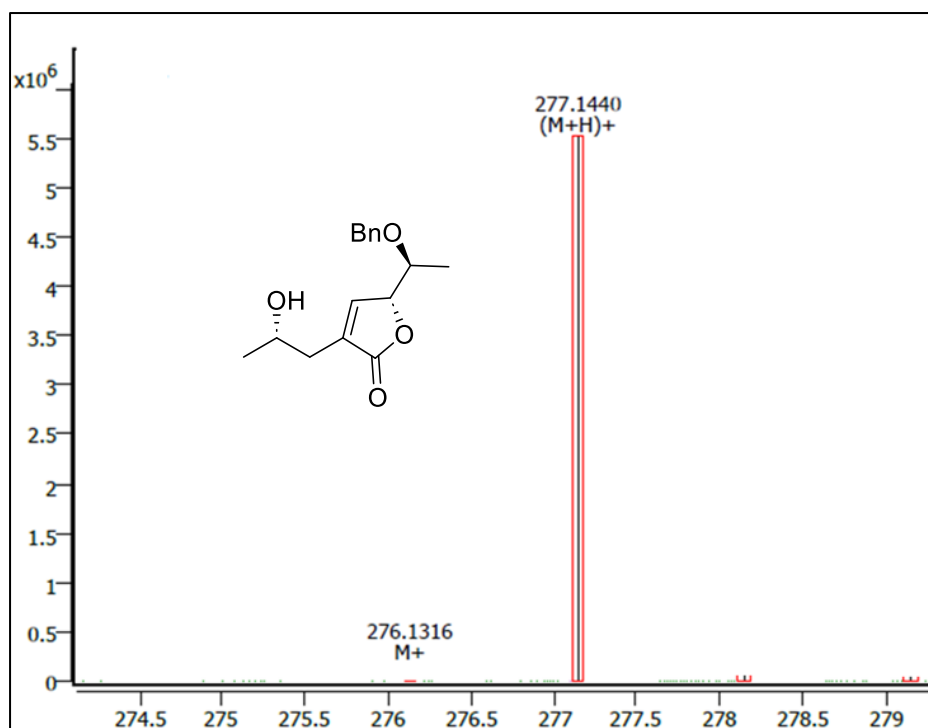

$^1\text{H}$  NMR (400 MHz,  $\text{CDCl}_3$ ) and  $^{13}\text{C}\{^1\text{H}\}$  NMR (100 MHz,  $\text{CDCl}_3$ ) of compound **15a**

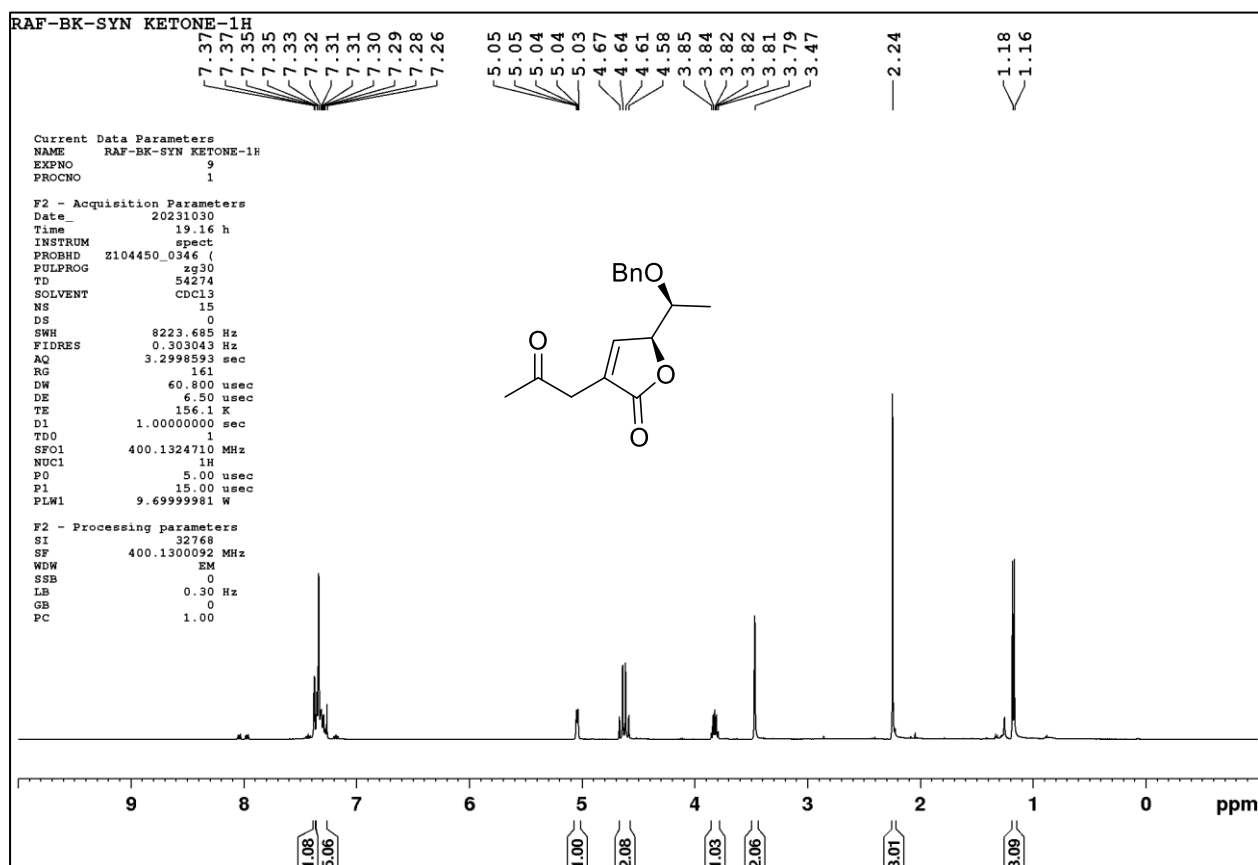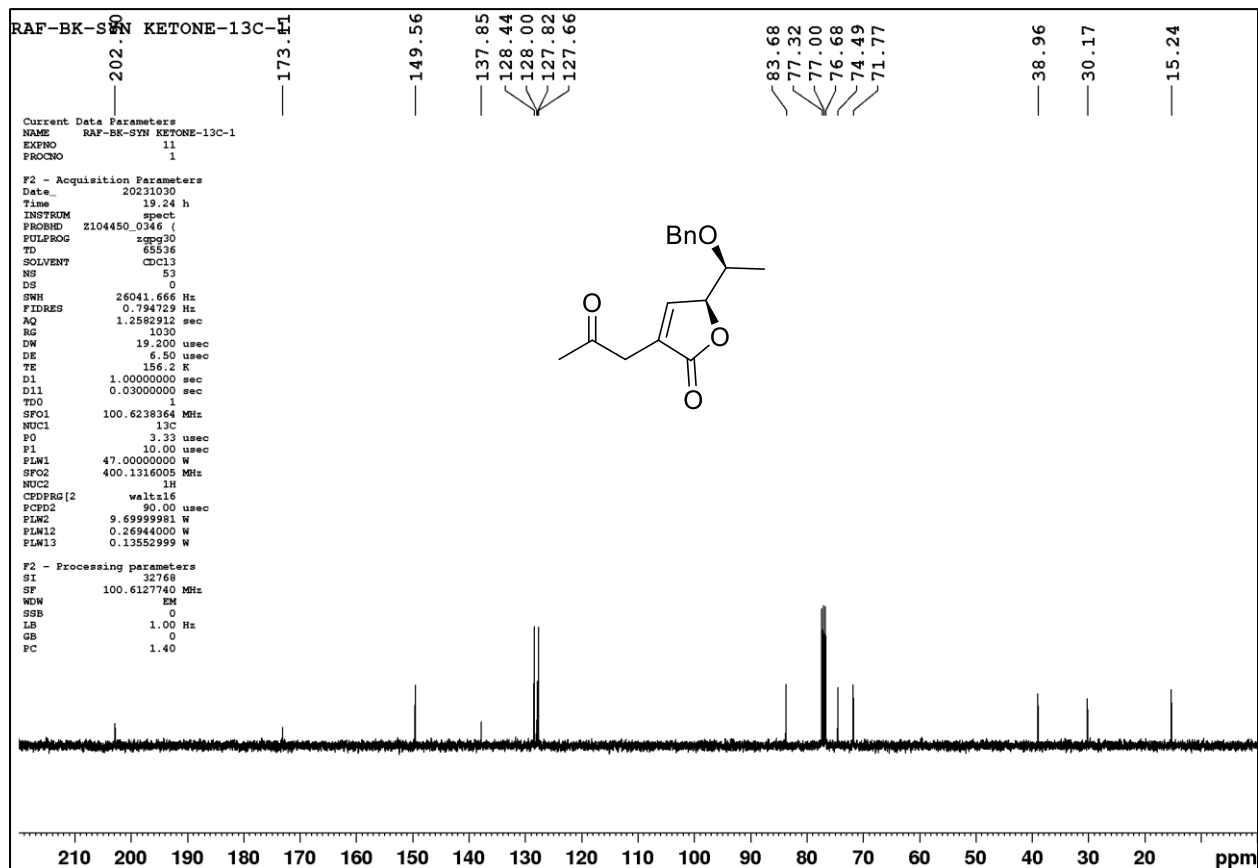

**15a:** HRMS (Q-TOF)  $m/z$ :  $[M + H]^+$  Calcd for  $C_{16}H_{19}O_4$  275.1278; Found 275.1278.

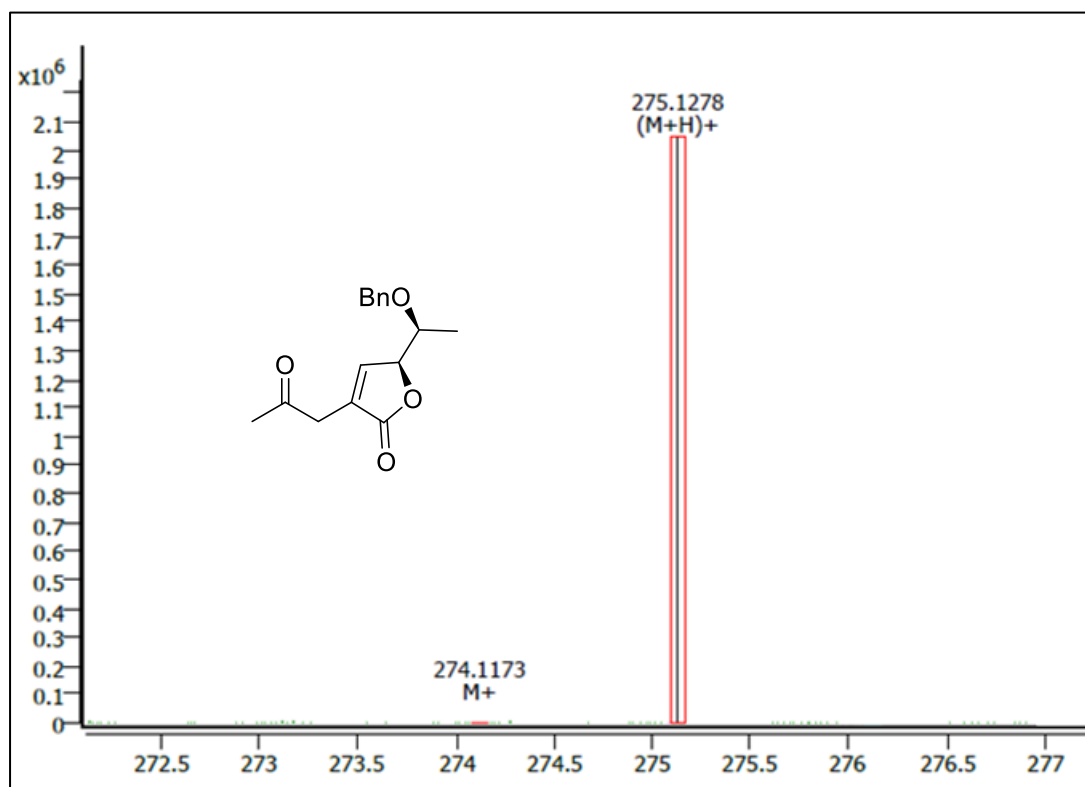

$^1\text{H}$  NMR (400 MHz,  $\text{CDCl}_3$ ) and  $^{13}\text{C}\{^1\text{H}\}$  NMR (100 MHz,  $\text{CDCl}_3$ ) of compound **15b**

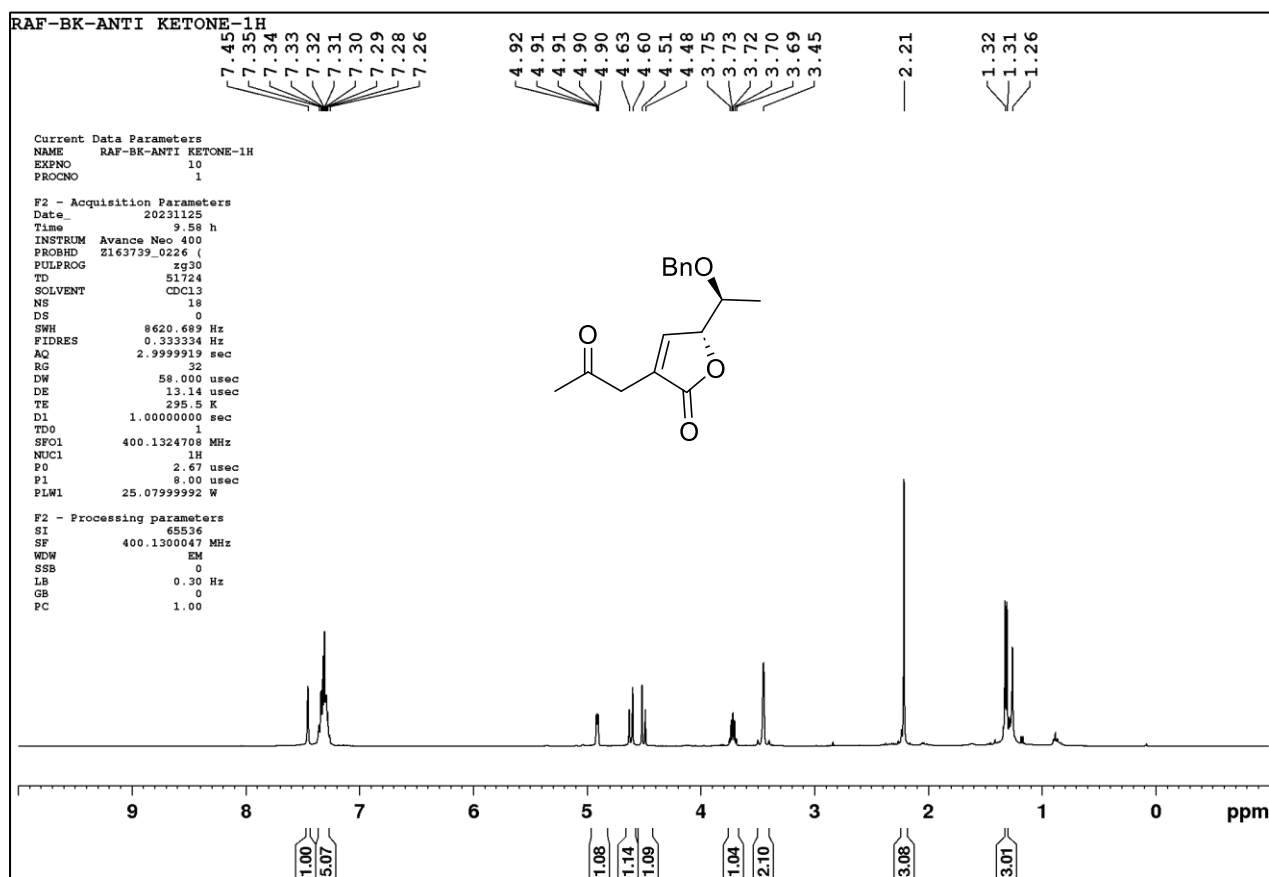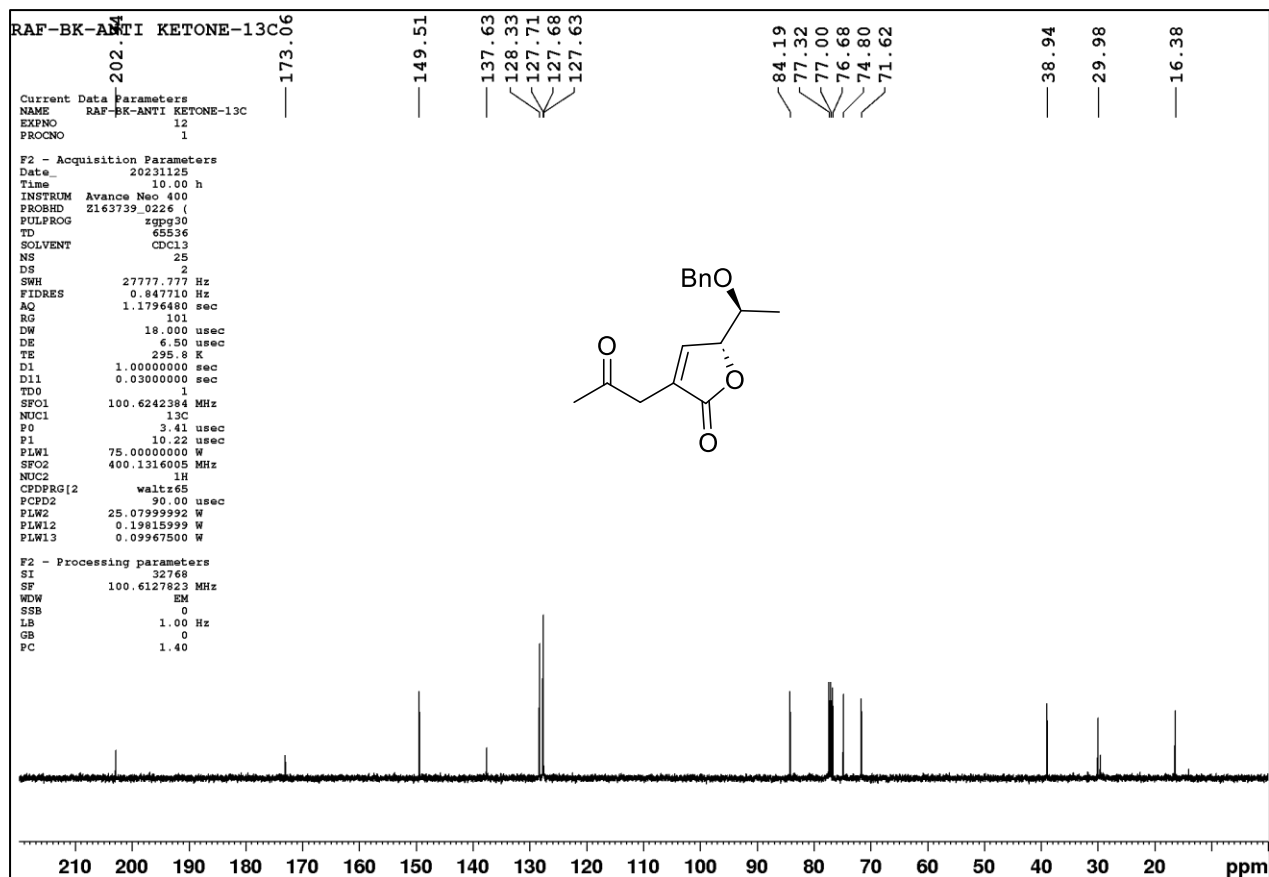

**15b:** HRMS (Q-TOF)  $m/z$ :  $[M + H]^+$  Calcd for  $C_{16}H_{19}O_4$  275.1278; Found 275.1279.

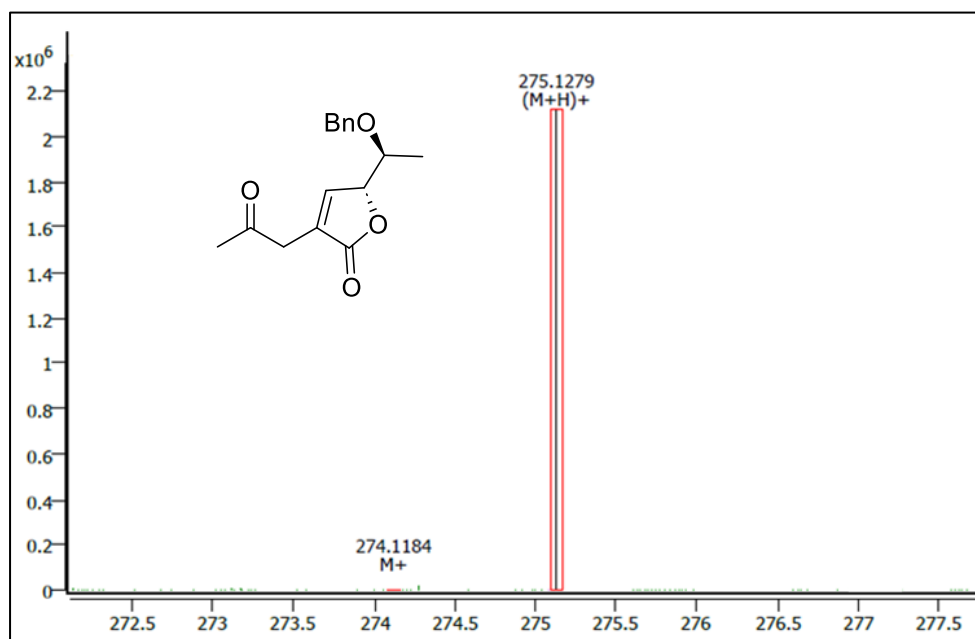

<sup>1</sup>H NMR (400 MHz, CDCl<sub>3</sub>) and <sup>13</sup>C{<sup>1</sup>H} NMR (100 MHz, CDCl<sub>3</sub>) of compound **1b'**

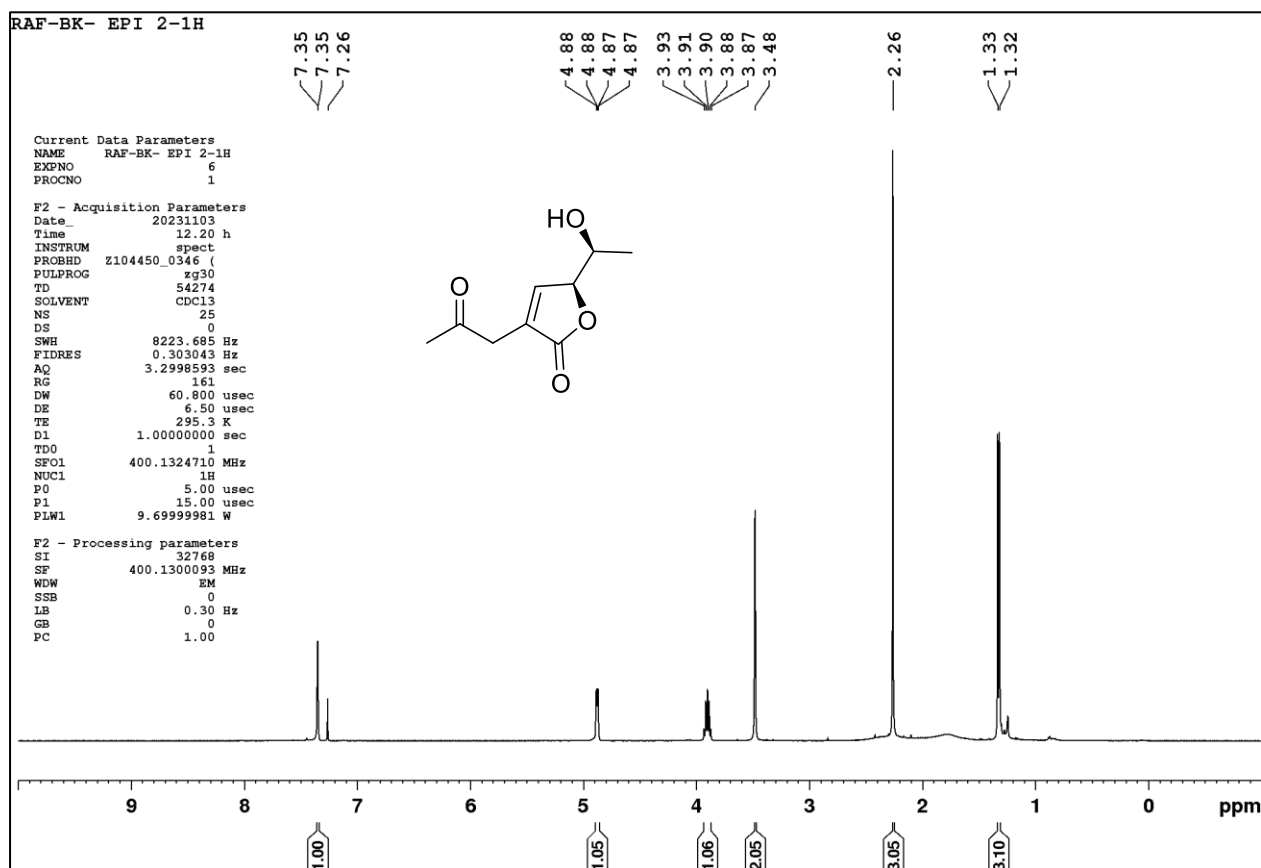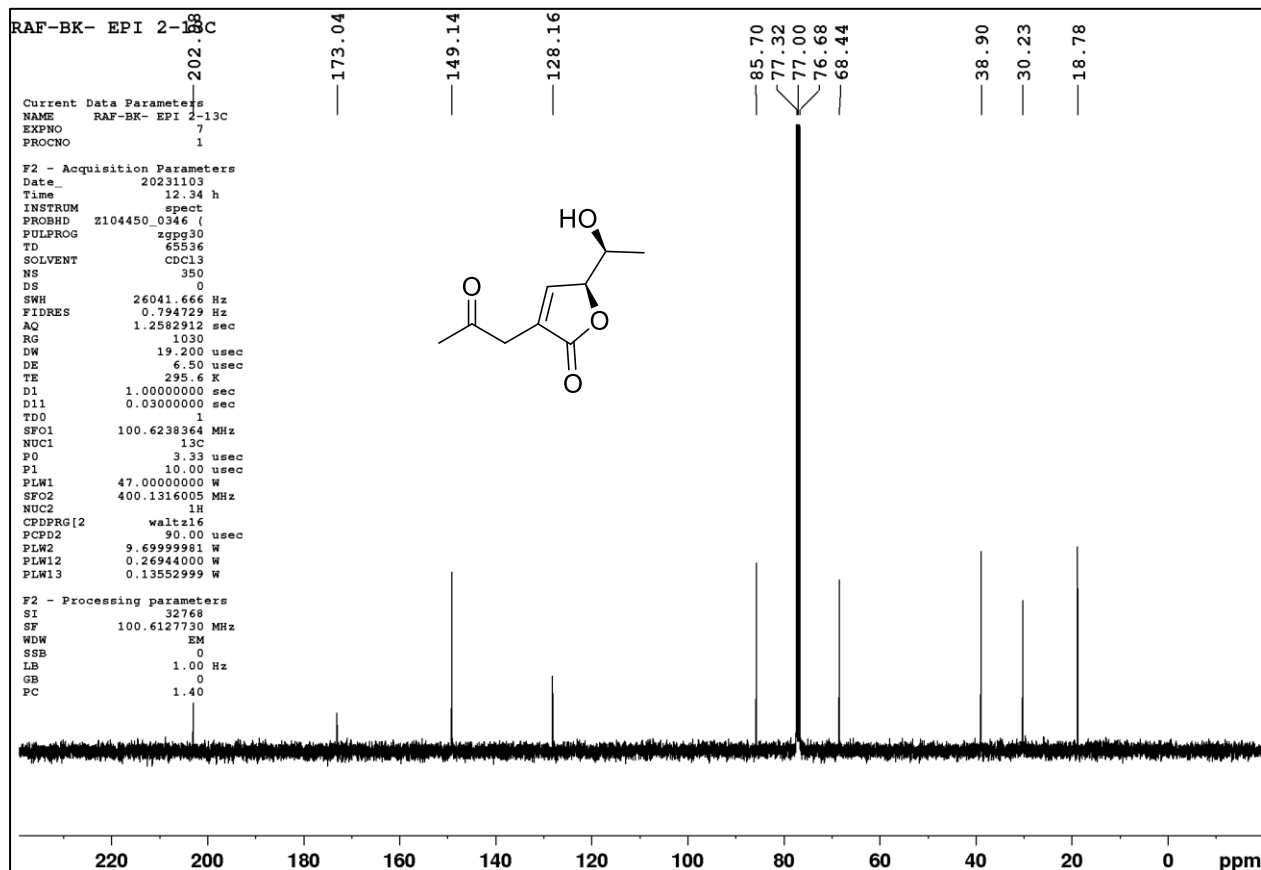

### H-H COSY spectra of compound **1b'**

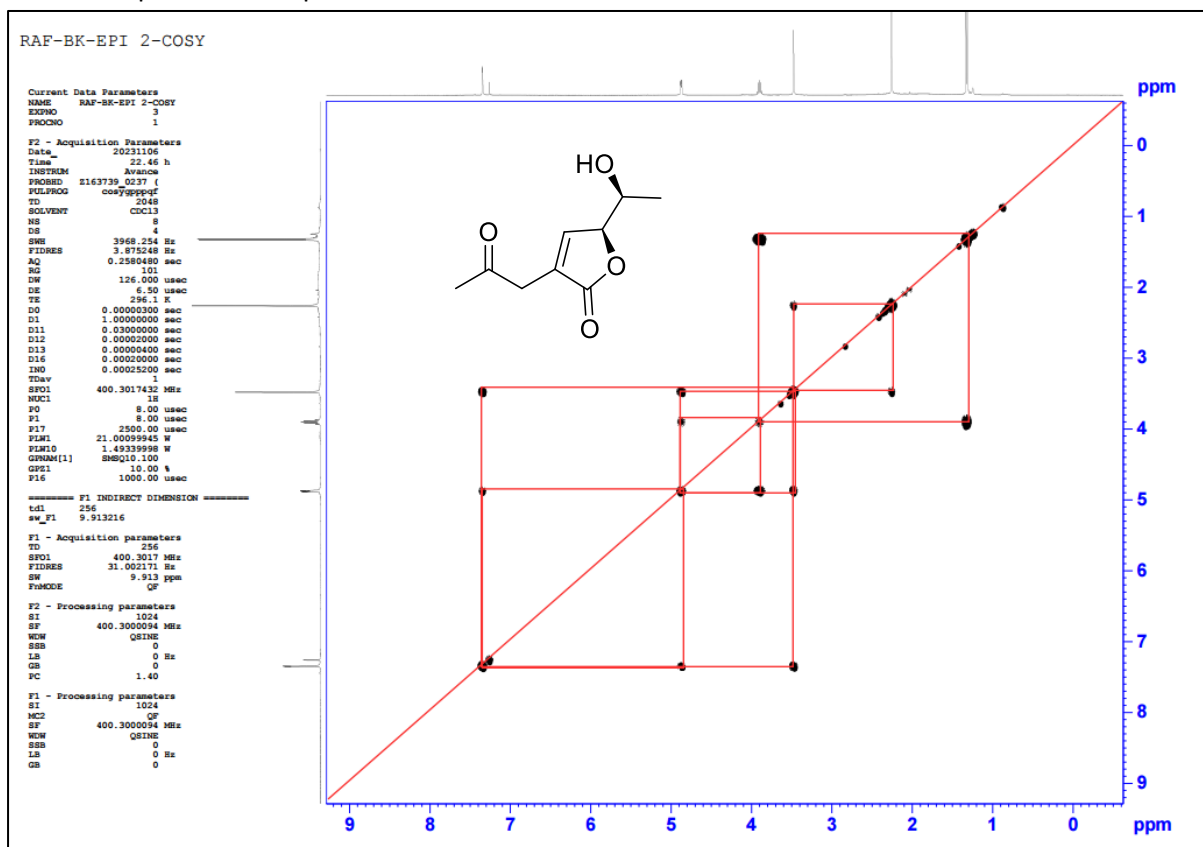

### NOESY spectra of compound **1b'**

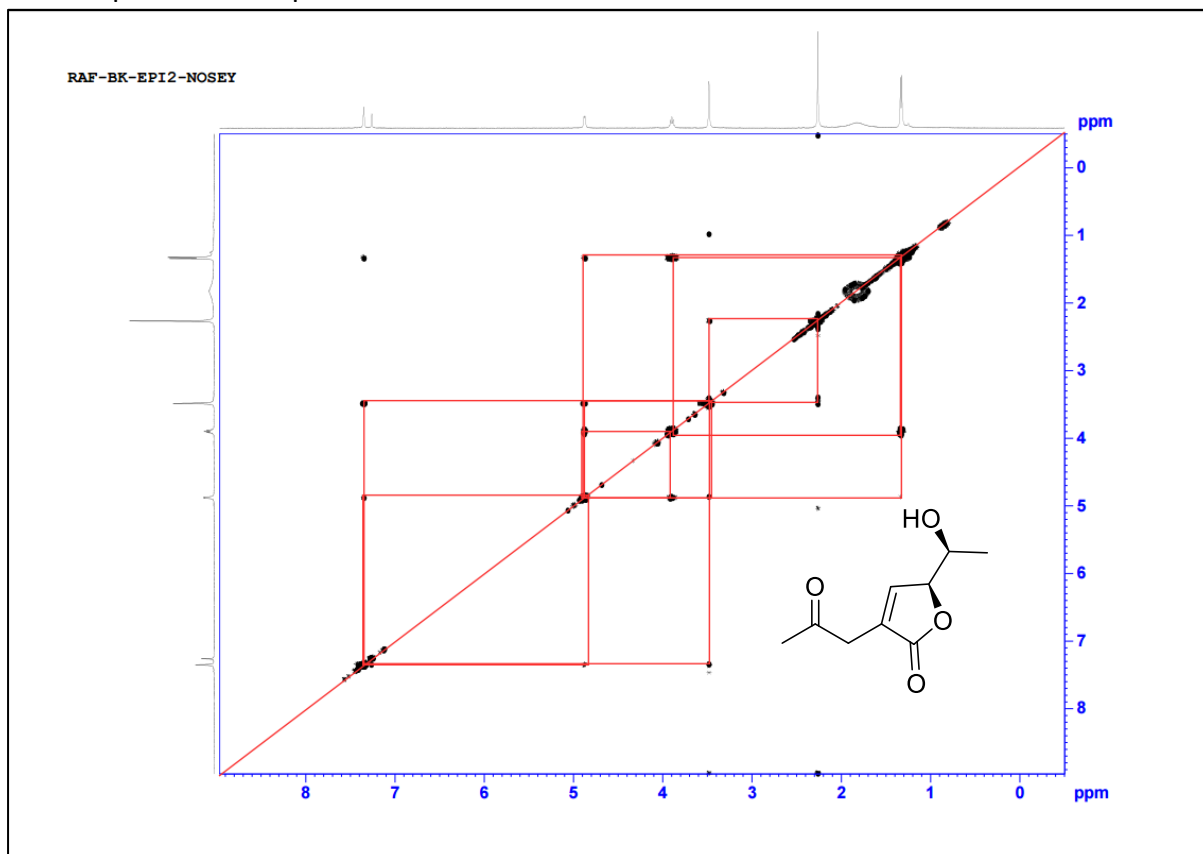



### HSQC spectra of compound **1b'**

RAF-BK-EPI2-HSQC

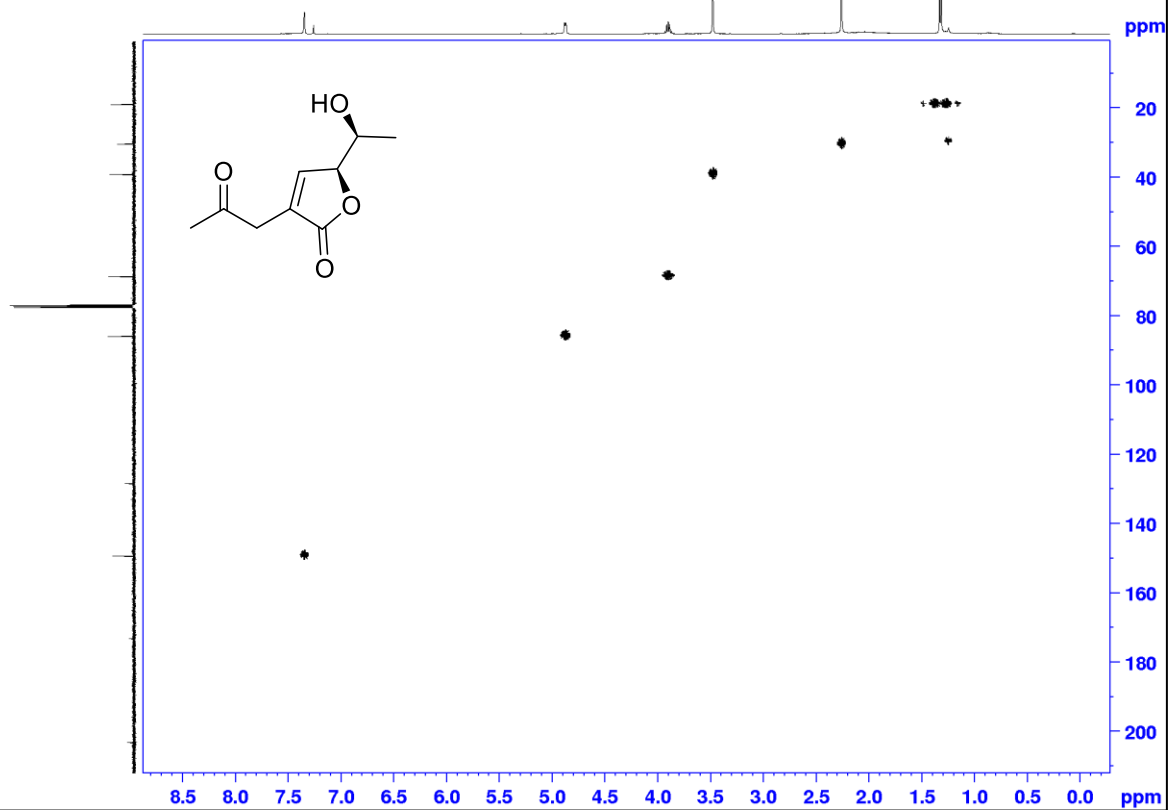

### HSBC spectra of compound **1b'**

RAF-BK-EPI2-HMBC

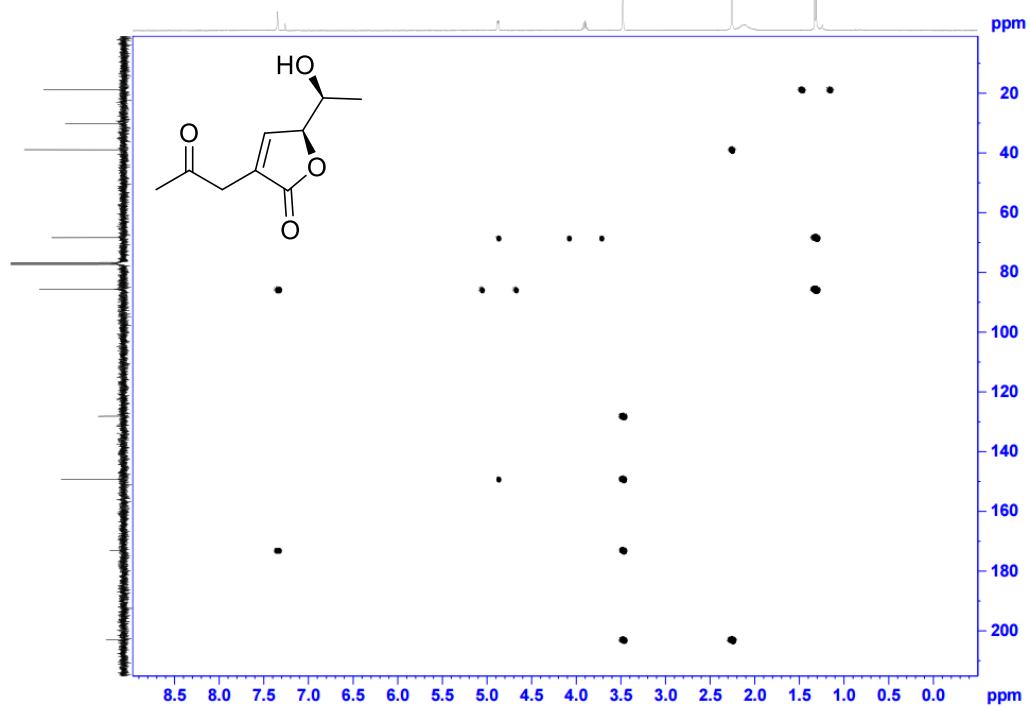

**1b'**: HRMS (Q-TOF)  $m/z$ :  $[M + H]^+$  Calcd for  $C_9H_{13}O_4$  185.0809; Found 185.0811.

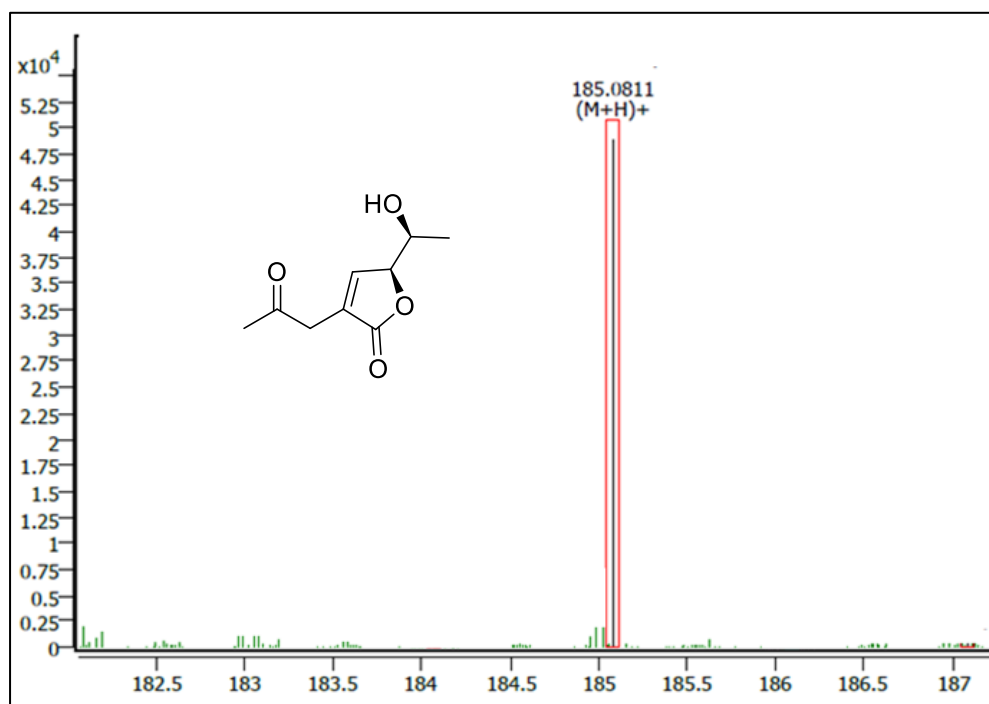

$^1\text{H}$  NMR (500 MHz,  $\text{CDCl}_3$ ) and  $^{13}\text{C}\{^1\text{H}\}$  NMR (125 MHz,  $\text{CDCl}_3$ ) of compound **1b**

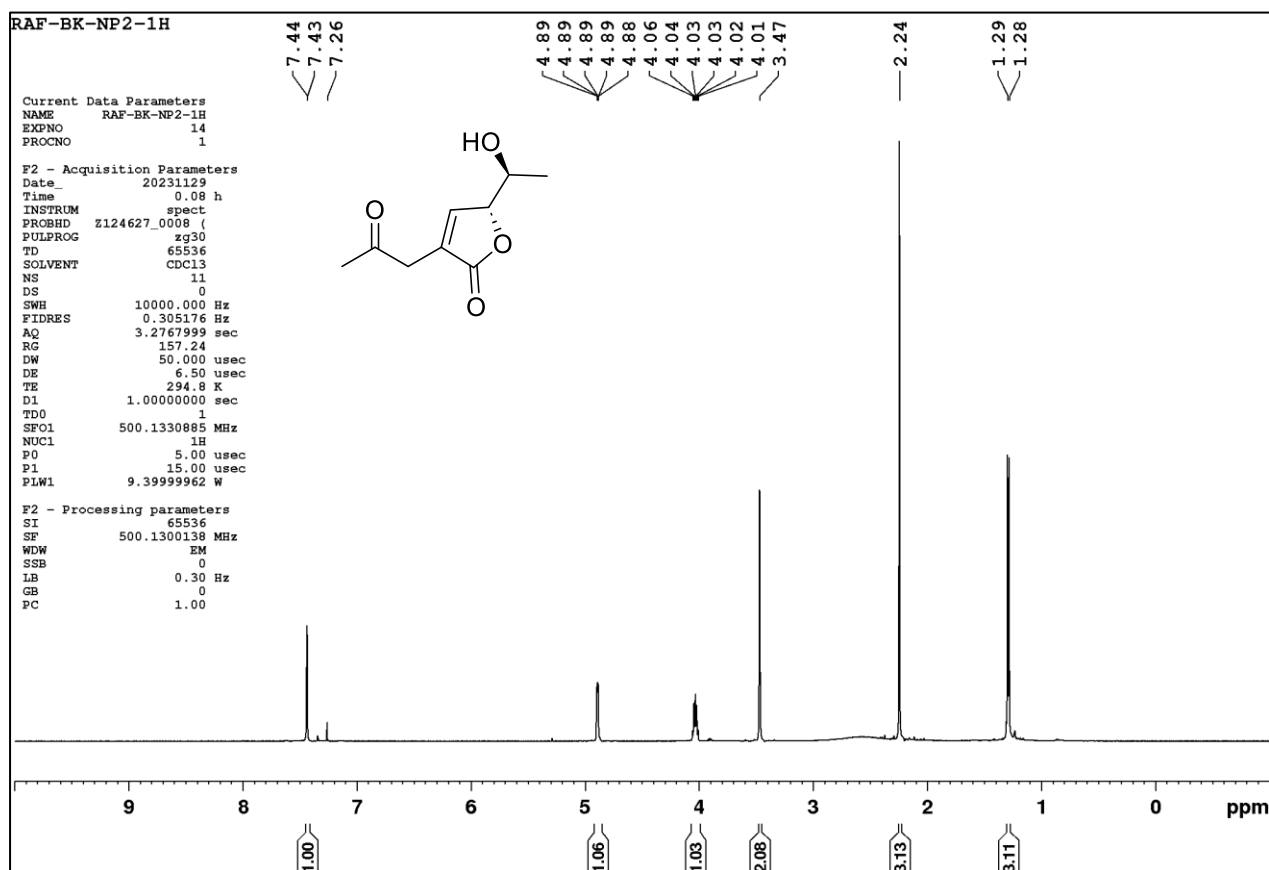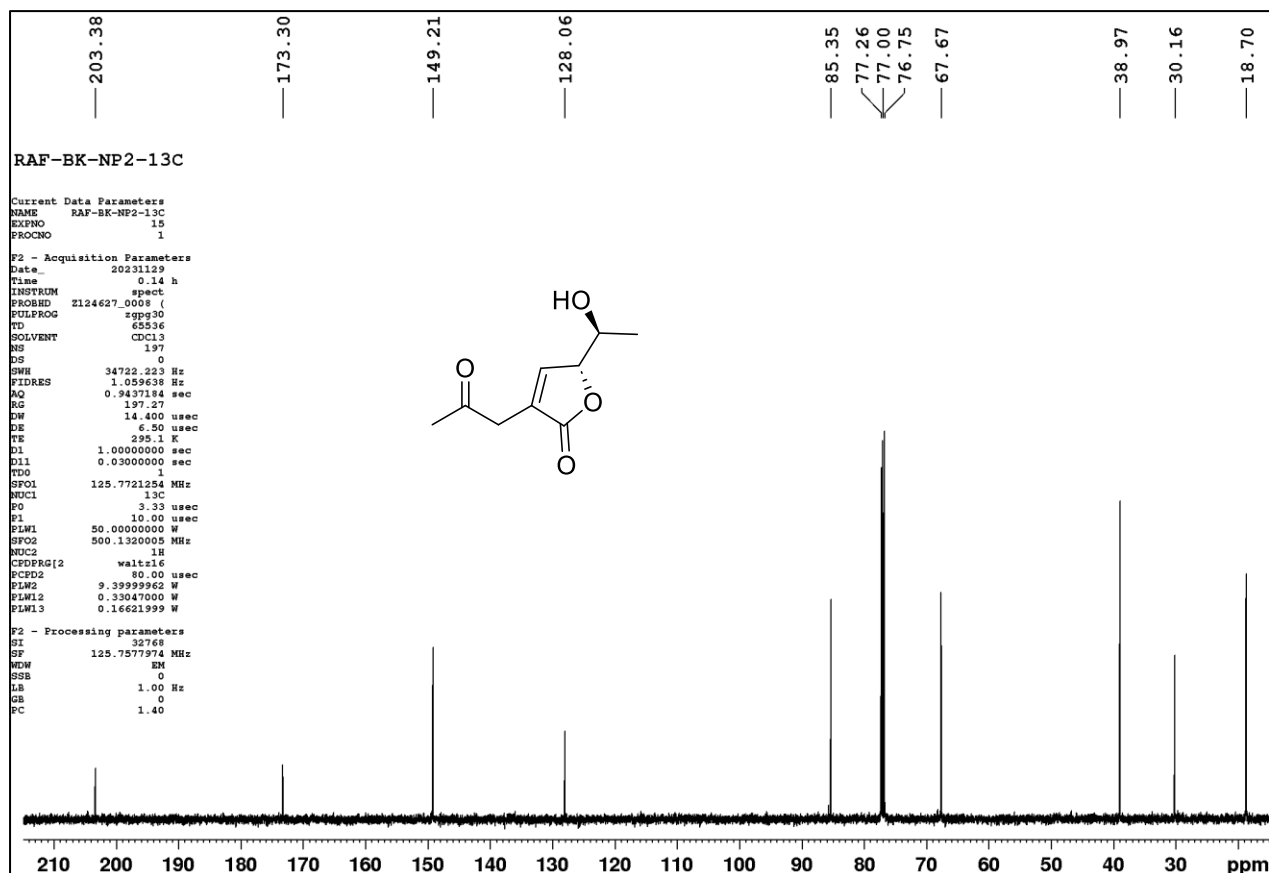

<sup>1</sup>H NMR Comparison data of compound **1b**: Isolated and our work

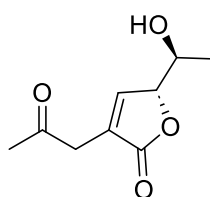

| <sup>1</sup> H NMR (400 MHz, CDCl <sub>3</sub> )<br>Isolated by Cui<br><i>Mar. Drugs</i> , 2014, 12, 3116 | <sup>1</sup> H NMR (500 MHz, CDCl <sub>3</sub> )<br>Our work |
|-----------------------------------------------------------------------------------------------------------|--------------------------------------------------------------|
| 7.43 (q, <i>J</i> = 1.4 Hz, 1H)                                                                           | 7.43 (d, <i>J</i> = 1.1 Hz, 1H)                              |
| 4.88 (dq, <i>J</i> = 4.7, 1.4 Hz, 1H)                                                                     | 4.88 (dq, <i>J</i> = 3.0, 1.4 Hz, 1H)                        |
| 4.02 (dq, <i>J</i> = 6.5, 4.7 Hz, 1H)                                                                     | 4.06–3.99 (m, 1H)                                            |
| 3.46 (t, <i>J</i> = 1.4 Hz, 2H)                                                                           | 3.47 (s, 2H)                                                 |
| 2.24 (s, 3H)                                                                                              | 2.24 (s, 3H)                                                 |
| 1.28 (d, <i>J</i> = 6.6 Hz, 3H)                                                                           | 1.28 (d, <i>J</i> = 6.6 Hz, 3H)                              |

<sup>13</sup>C NMR Comparison data of compound **1b**: Isolated and our work

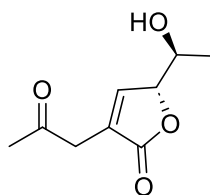

| <sup>13</sup> C NMR (100 MHz, CDCl <sub>3</sub> )<br>Isolated by Cui<br><i>Mar. Drugs</i> , 2014, 12, 3116 | <sup>13</sup> C NMR (125 MHz, CDCl <sub>3</sub> )<br>Our work |
|------------------------------------------------------------------------------------------------------------|---------------------------------------------------------------|
| 203.6                                                                                                      | 203.4                                                         |
| 173.5                                                                                                      | 173.3                                                         |
| 149.4                                                                                                      | 149.2                                                         |
| 128.2                                                                                                      | 128.1                                                         |
| 85.5                                                                                                       | 85.4                                                          |
| 67.8                                                                                                       | 67.7                                                          |
| 39.1                                                                                                       | 39.0                                                          |
| 30.3                                                                                                       | 30.2                                                          |
| 18.9                                                                                                       | 18.7                                                          |

## H-H COSY spectra of compound **1b**

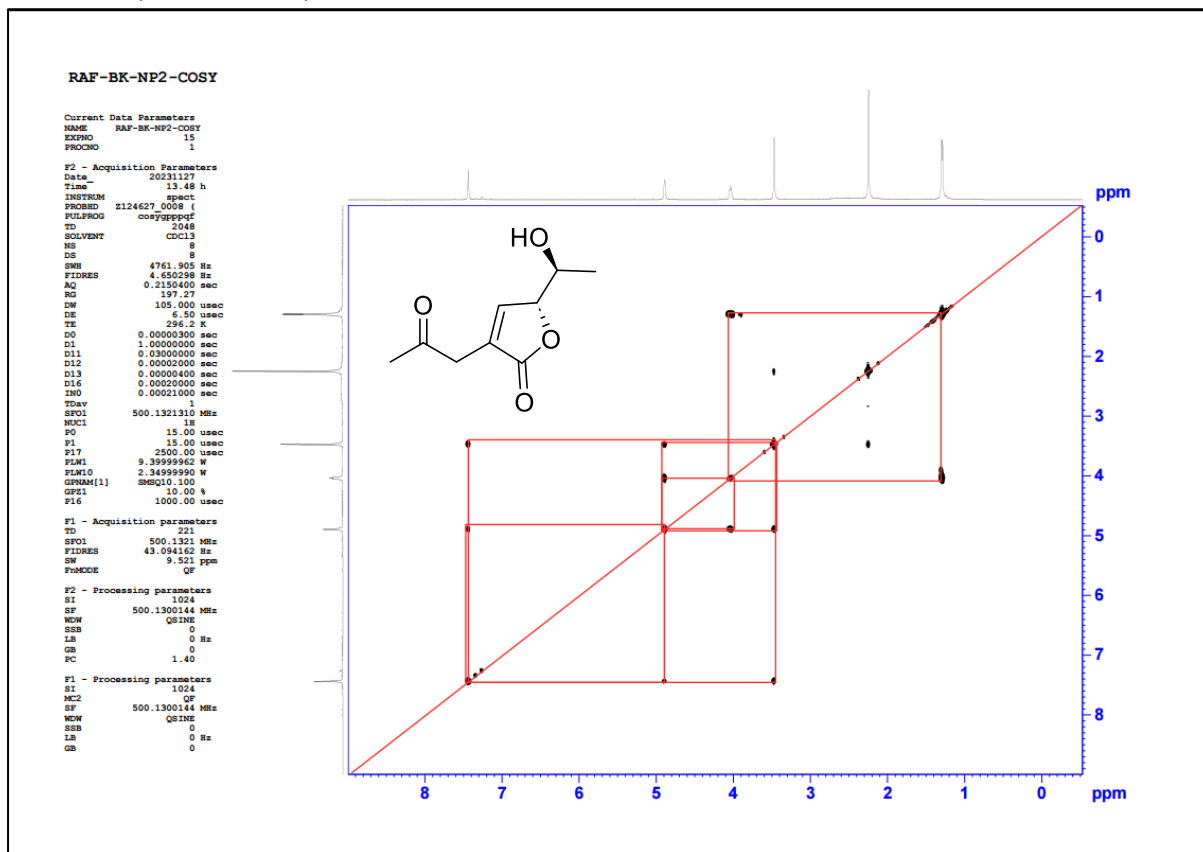

## NOESY spectra of compound **1b**

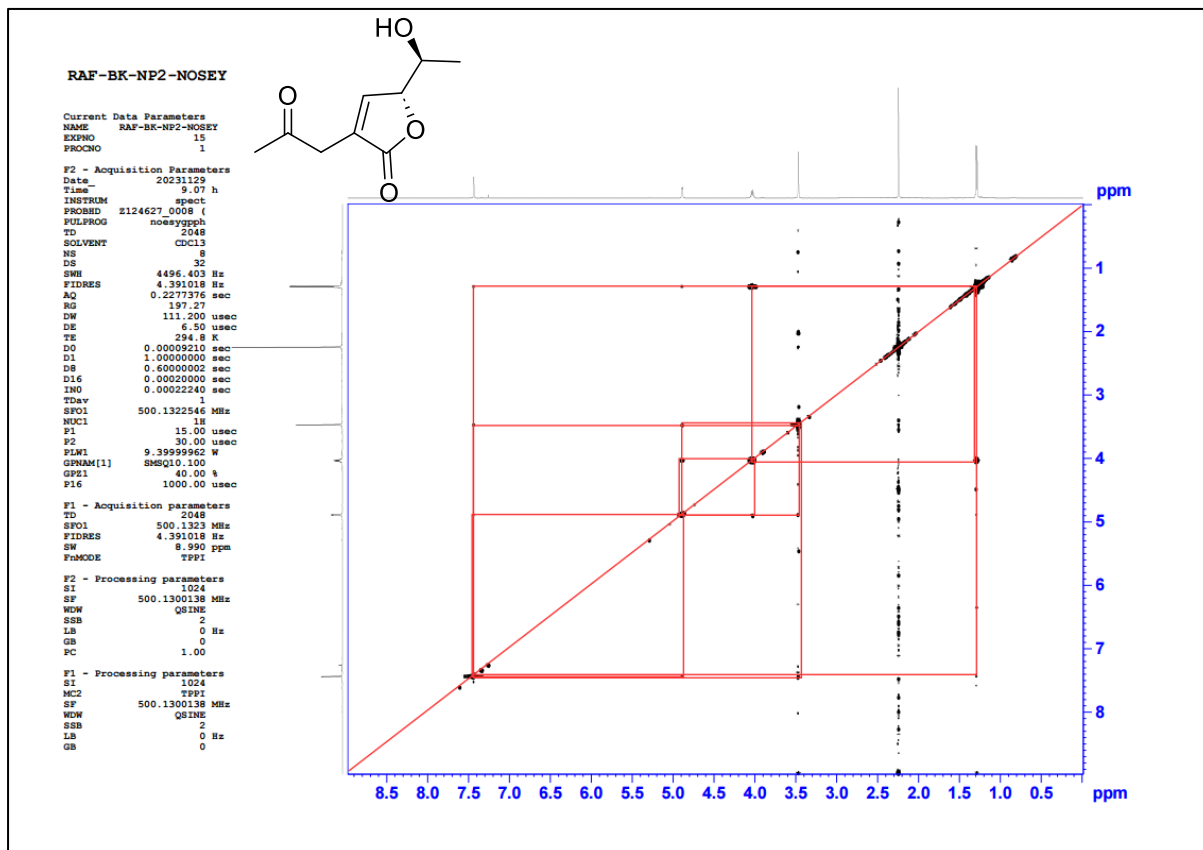

### HSBC spectra of compound **1b**

RAF-BK-NP2-HSQC

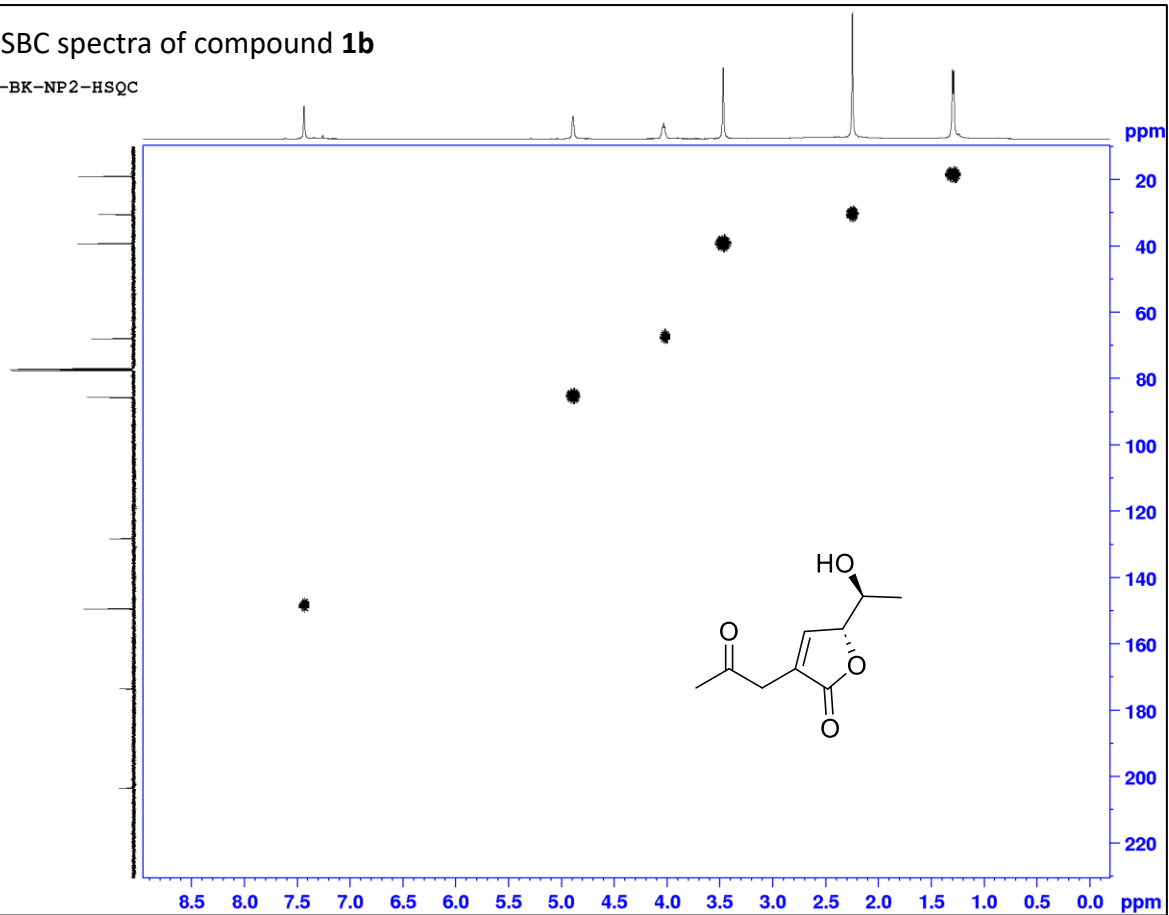

### HSBC spectra of compound **1b**

RAF-BK-NP2-HMBC

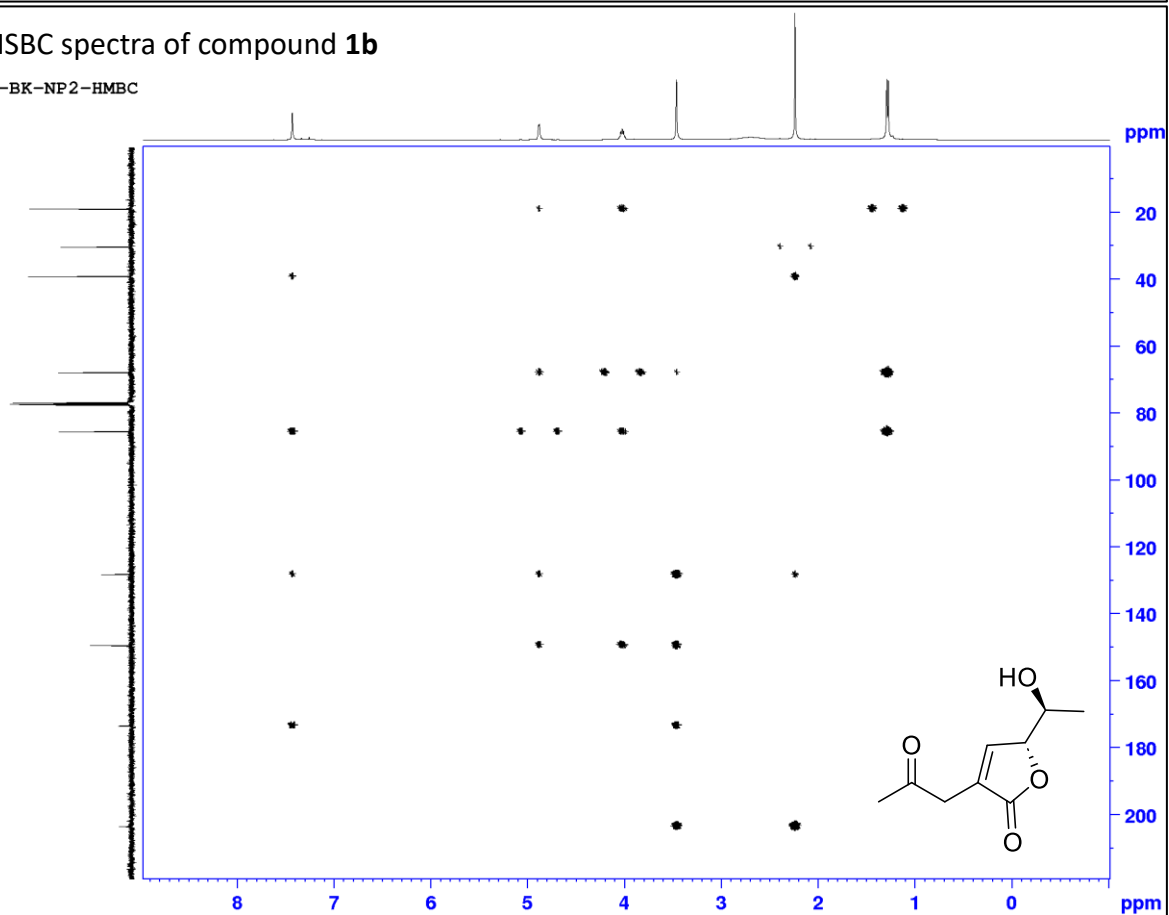

**1b**: HRMS (Q-TOF)  $m/z$ :  $[M + H]^+$  Calcd for  $C_9H_{13}O_4$  185.0809; Found 185.0812.

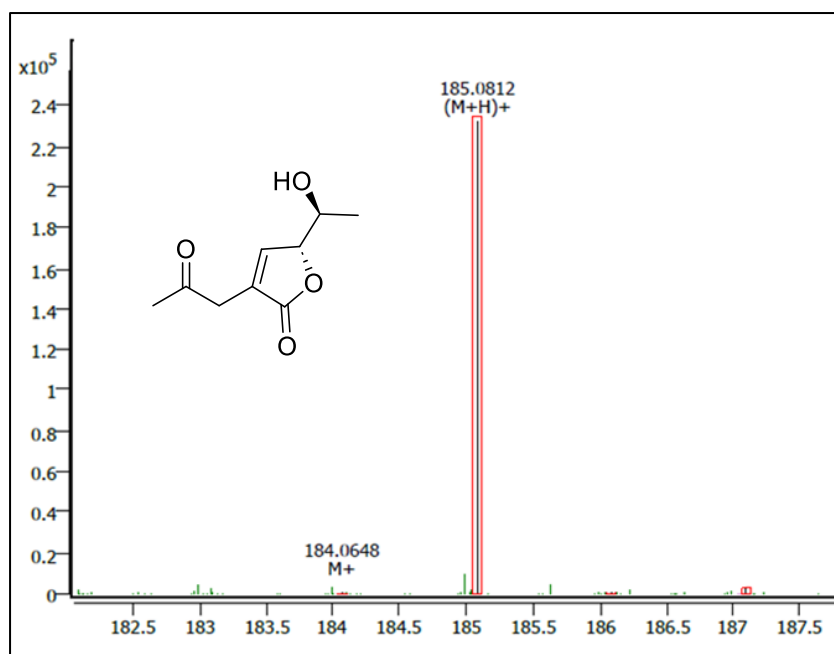

Supplement: d4ob00549j2.pdf [file d4ob00549j2.pdf]
