# Supplementary material for: Asymmetric total syntheses of aspilactonol F and aspiketolactonol and synthetic studies toward diplofuranoxin
Source: Royal Society of Chemistry journal article supplement (doi:10.1039/d4ob00549j), 2024-01-01

Comparison of Spectral data of final compounds with that reported in literature. For review only.

$^1\text{H}$  NMR (500 MHz,  $\text{CDCl}_3$ ) and reported spectra of compound **1a**

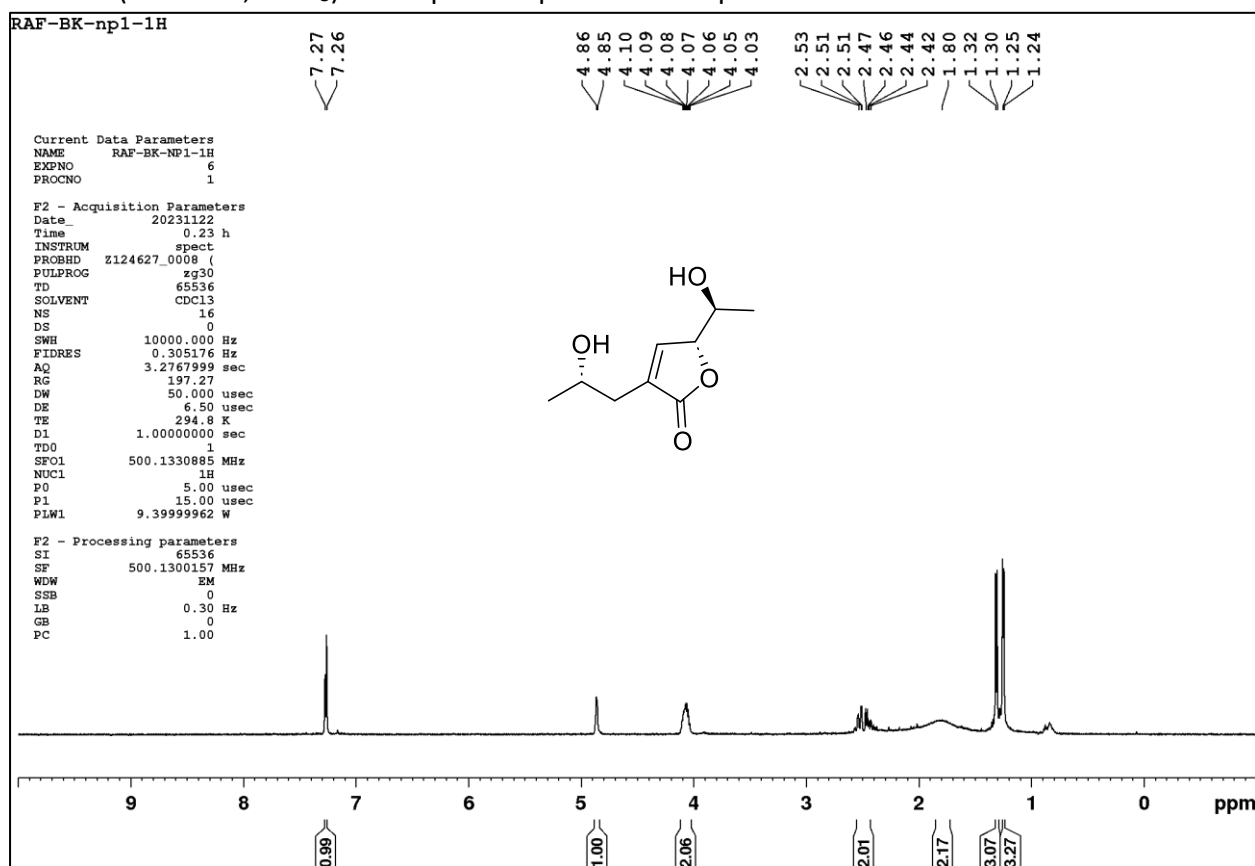

Figure S1.  $^1\text{H}$  NMR (500 MHz,  $\text{CDCl}_3$ ) spectrum of aspiralonol F (**1**)

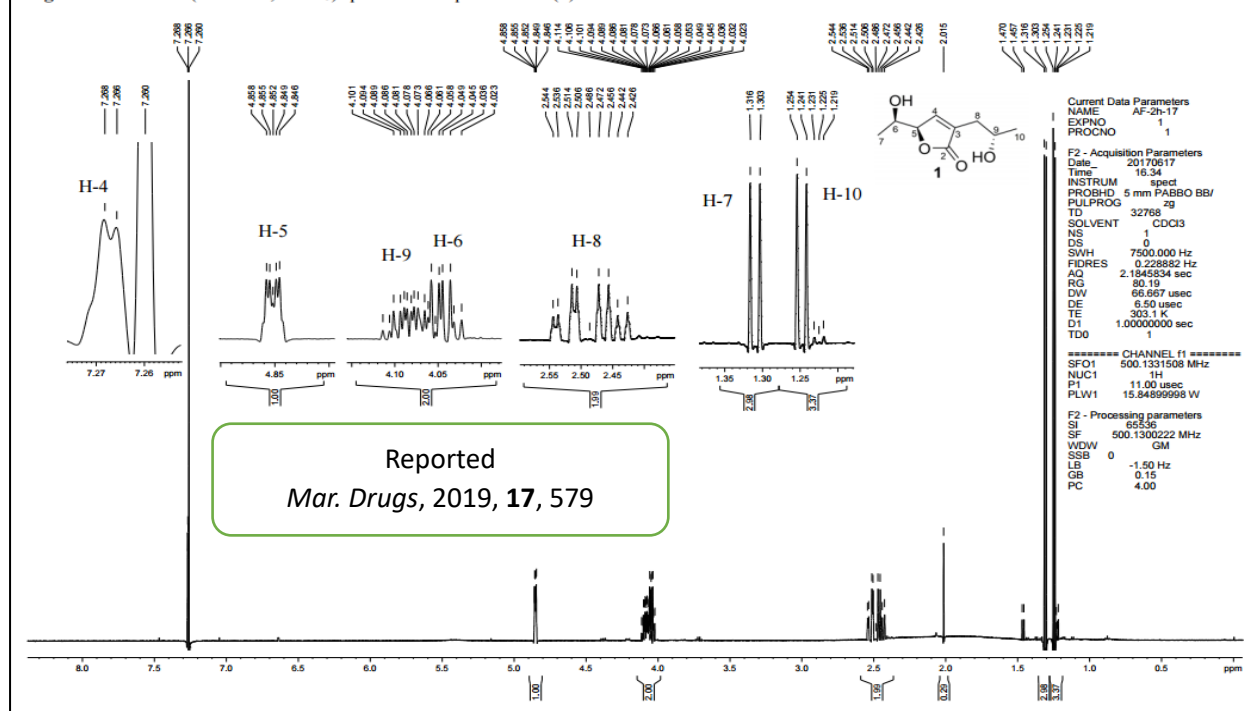

**NOTE:** Here the structure in the literature spectra is wrongly given by them. It should be actually the **1a** with 5,6-chirality anti. In the paper they have given correctly.

$^{13}\text{C}\{^1\text{H}\}$  NMR (125 MHz,  $\text{CDCl}_3$ ) and reported spectra of compound **1a**

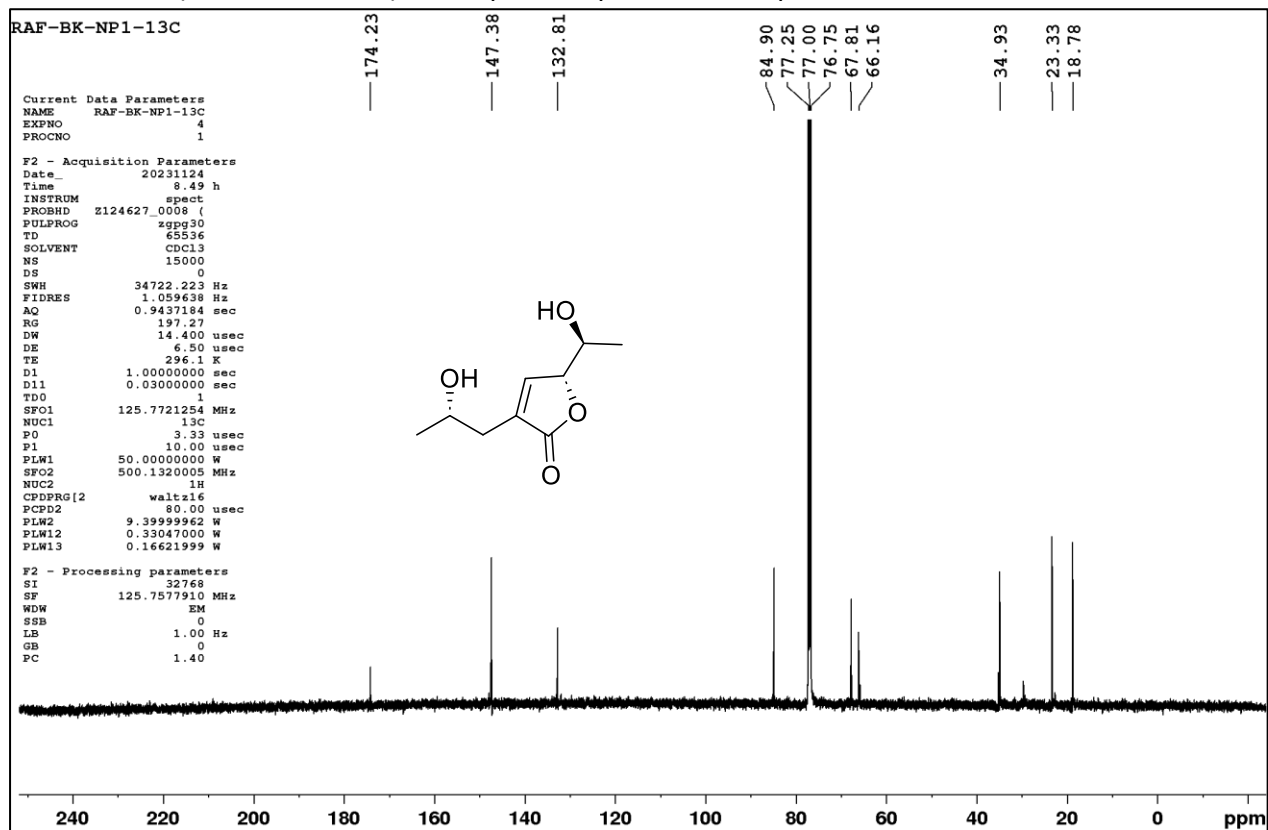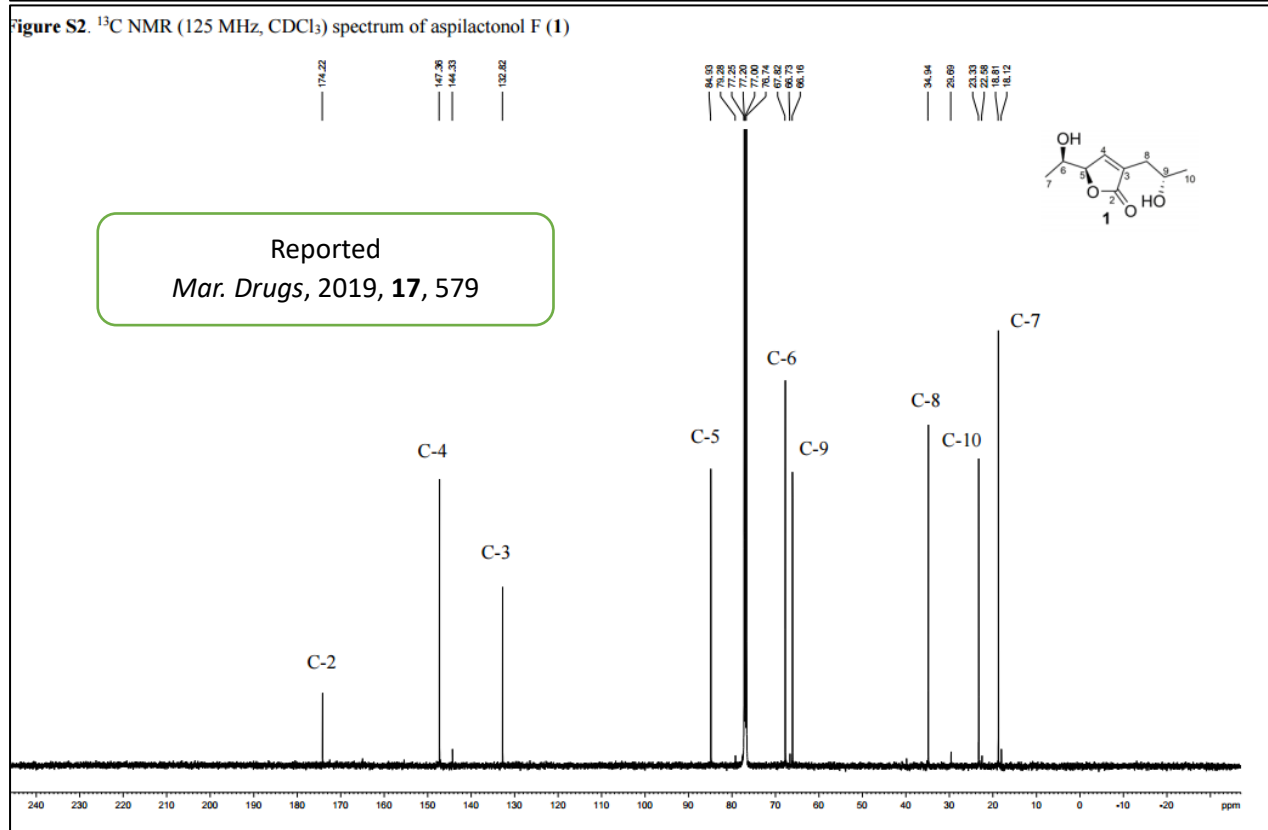

**NOTE:** Here the structure in the literature spectra is wrongly given by them. It should be actually the **1a** with 5,6-chirality anti. In the paper they have given correctly.

<sup>1</sup>H NMR (500 MHz, CDCl<sub>3</sub>) and reported spectra of compound **1b**

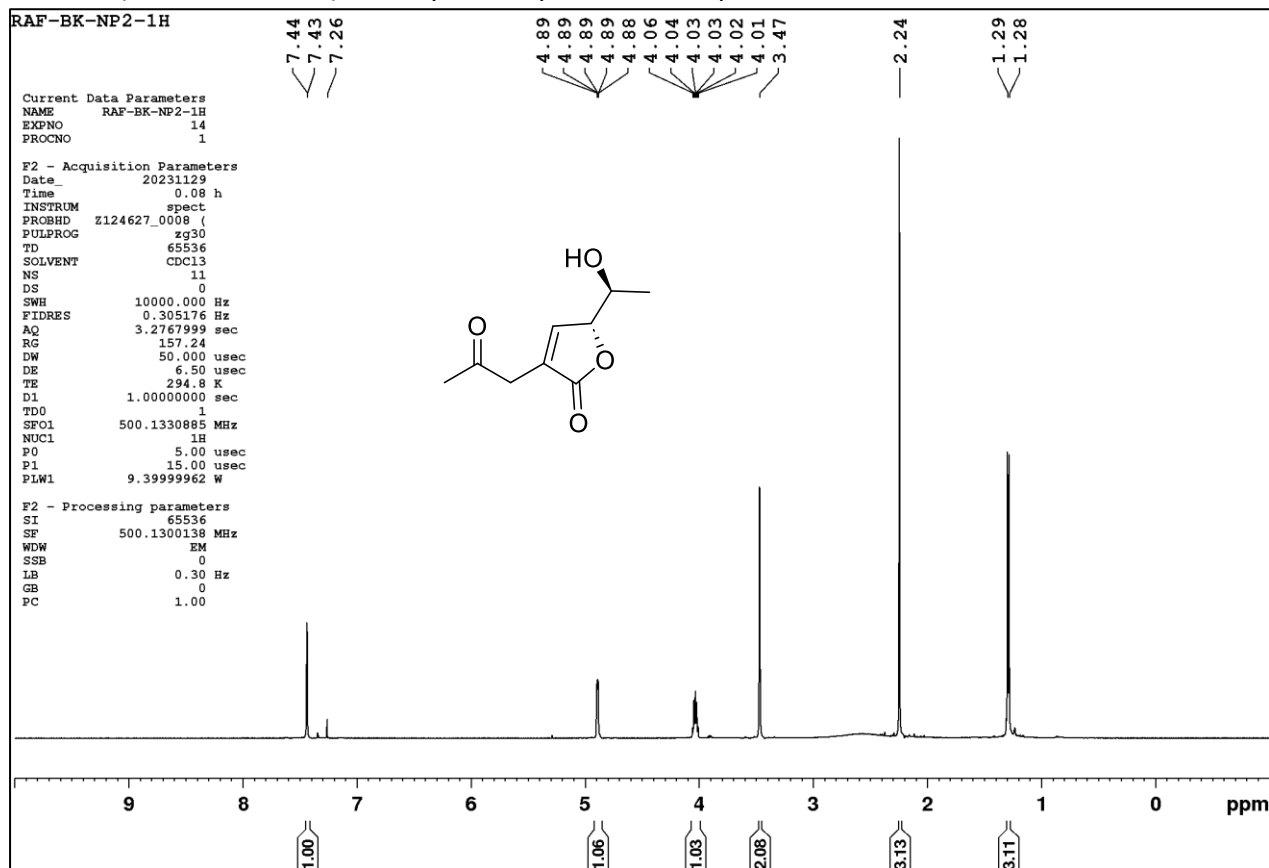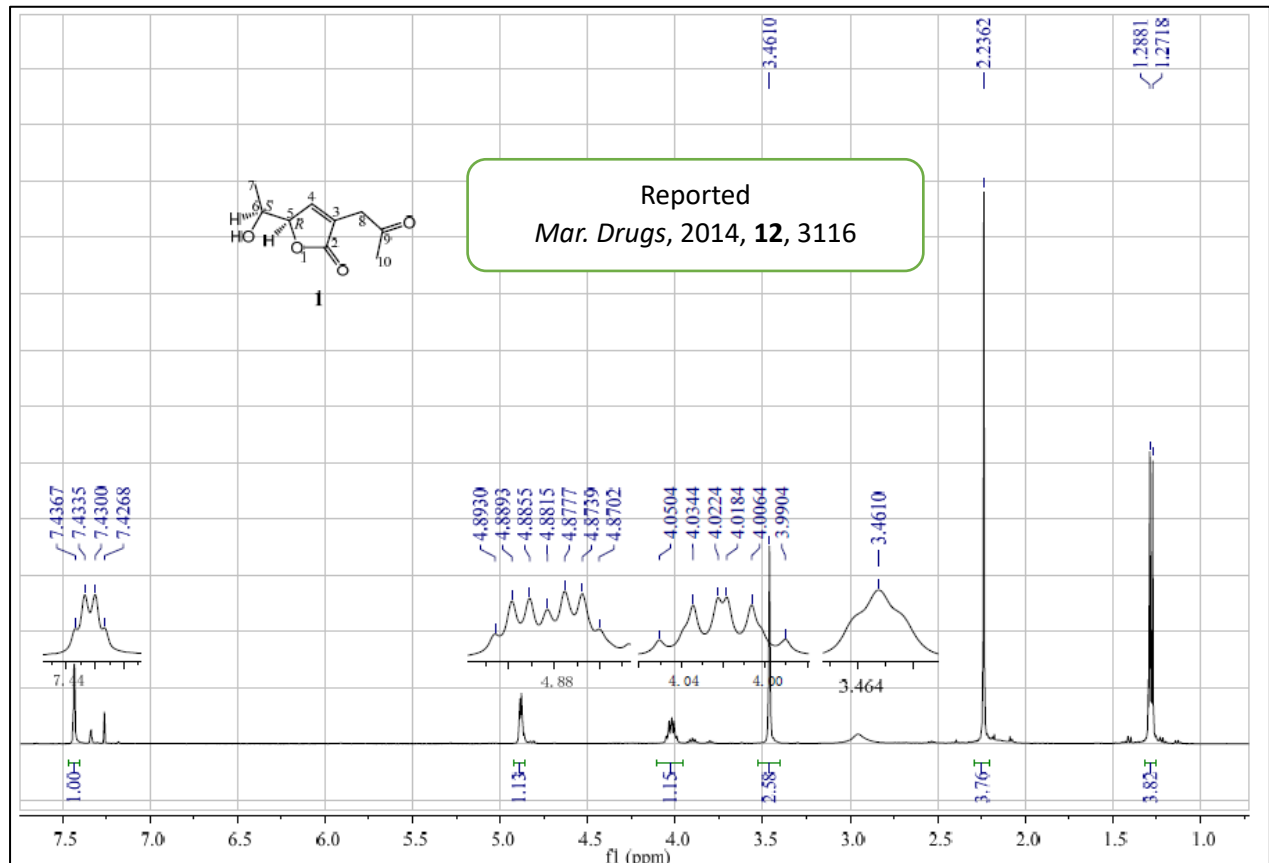

$^{13}\text{C}\{^1\text{H}\}$  NMR (125 MHz,  $\text{CDCl}_3$ ) and reported spectra of compound **1b**

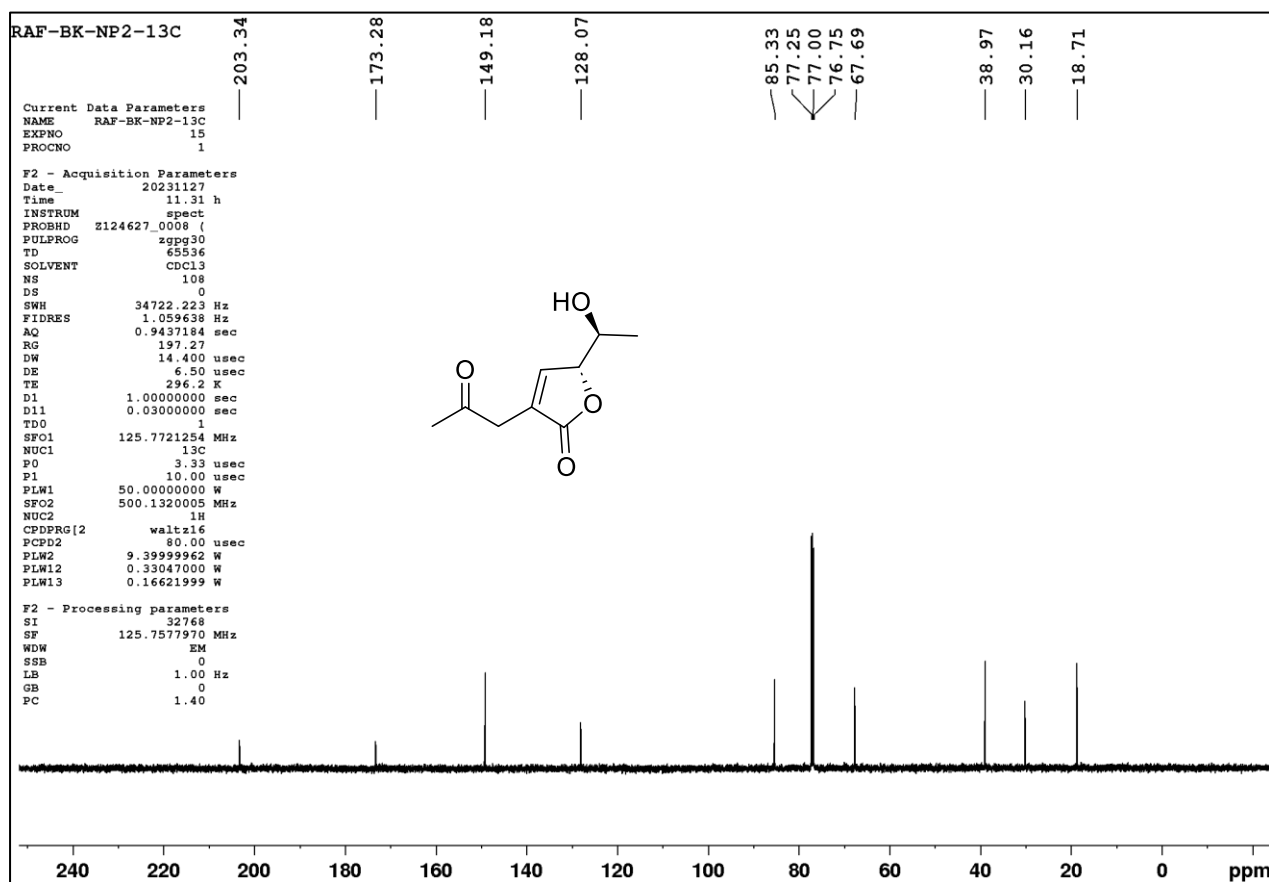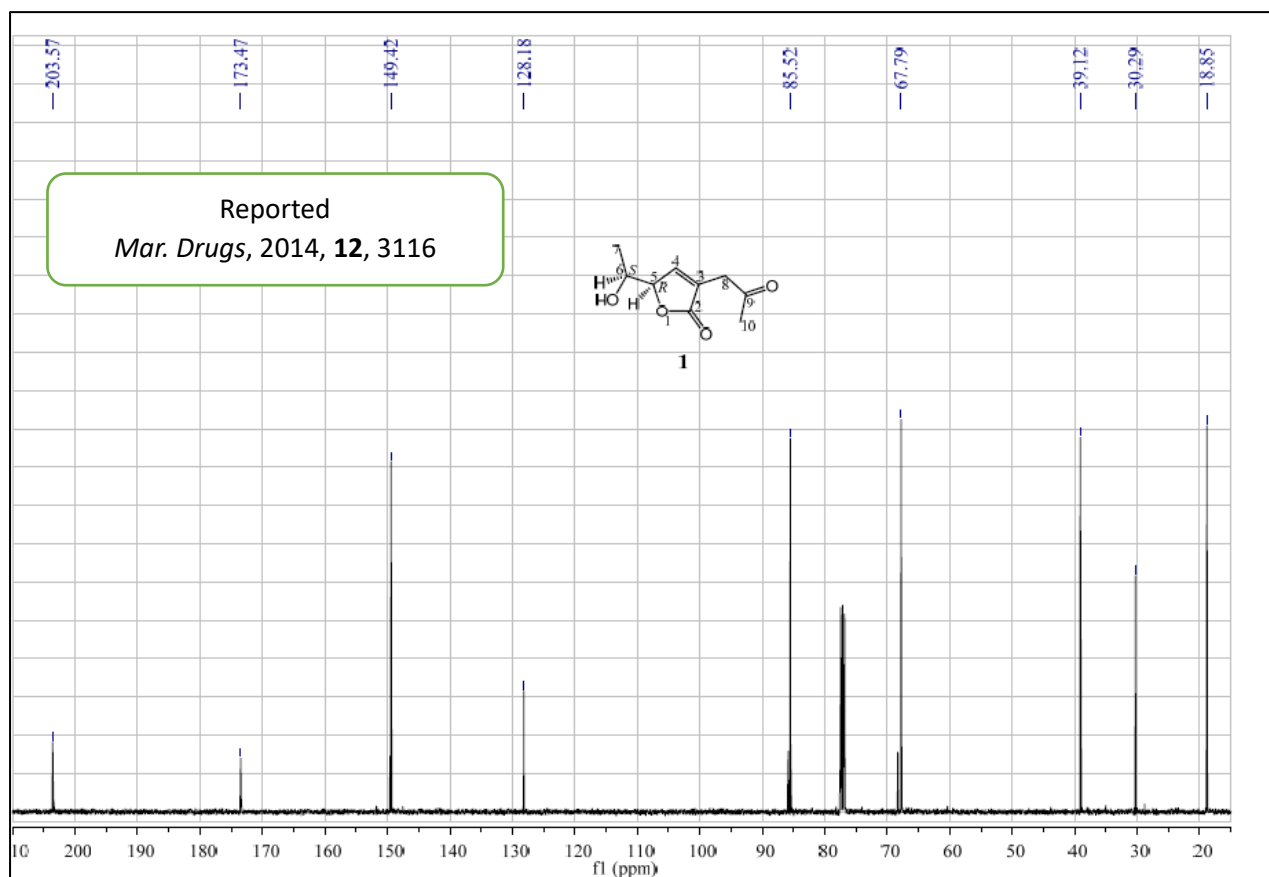

Supplement: d4ob00549j1.pdf [file d4ob00549j1.pdf]
